# Supplementary material
Source: PubMed Central journal article supplement (PMC5324081)
Supplement: oc6b00330_si_001.pdf [file oc6b00330_si_001.pdf]

## SUPPORTING INFORMATION

### Two-Way Chemical Communication between Artificial and Natural Cells

Roberta Lentini,<sup>†,‡</sup> Noël Yeh Martín,<sup>†,‡</sup> Michele Forlin,<sup>†</sup> Luca Belmonte,<sup>†</sup> Jason Fontana,<sup>†</sup> Michele Cornella,<sup>†</sup> Laura Martini,<sup>†</sup> Sabrina Tamburini,<sup>†</sup> William E. Bentley,<sup>§</sup> Olivier Jousson,<sup>†</sup> and Sheref S. Mansy<sup>\*,†</sup>

<sup>†</sup>CIBIO, University of Trento, via Sommarive 9, 38123 Povo, Italy

<sup>§</sup>Institute for Bioscience and Biotechnology Research, University of Maryland, College Park, Maryland 20742, United States

<sup>‡</sup>R.L. and N.Y.M. contributed equally to this work.

\*Corresponding Author; E-mail: mansy@science.unitn.it.

## MATERIAL AND METHODS

**Bacterial strains and media.** Strains used in this study are listed in Table S4. *E. coli* and *P. aeruginosa* were grown in LB. *V. fischeri* was grown in LBS (10 g/L tryptone, 5 g/L yeast extract, 20 g/L NaCl, 50mM Tris-HCl, 0.3% glycerol) for experiments and either LBS or photobacterium broth (0.3 g/L NH<sub>4</sub>Cl, 1 g/L CaCO<sub>3</sub>, 5 g/L casein enzymatic hydrolysate, 0.01 g/L FeCl<sub>3</sub>, 0.3 g/L MgSO<sub>4</sub>•7H<sub>2</sub>O, 3 g/L KH<sub>2</sub>PO<sub>4</sub>, 30 g/L NaCl, 23.5 g/L sodium glycerophosphate, 2.5 g/L yeast extract) to make glycerol cell stocks. *V. harveyi* was grown in marine broth supplemented with 2% casamino acids when glycerol cell stocks were made or in Autoinducer Bioassay (AB) media (17.5 g/L NaCl, 12.3 g/L MgSO<sub>4</sub>•7H<sub>2</sub>O, 2 g/L casamino acids, 10 mM potassium phosphate pH 7, 1 mM L-arginine, 1% (v/v) glycerol) for the chemical communication experiments. When necessary, media were supplemented with antibiotic (100 µg/mL ampicillin, 50 µg/mL kanamycin, or 34 µg/mL chloramphenicol).

**Genetic constructs.** *IsrR*, *IsrK*, and the intergenic operon region of *Isr* were amplified from the genome of *E. coli* MG1655 by PCR. The gene coding for *Staphylococcus aureus* α-hemolysin (αHL) was synthesized by Genscript. T3 RNA polymerase (BBa\_K346000), AiiA (BBa\_C0160) and the following devices BBa\_K575024, BBa\_K575037, and BBa\_T9002 were taken from the registry of standard biological parts. The gene encoding firefly luciferase was amplified from pBESTluc (Promega). Sequence information for the exploited constructs can be found in Table S5.

**In vitro transcription-translation.** The constructs encoding parts of the *E. coli* AI-2 quorum pathway were expressed with the PURE system (New England BioLabs). Each reaction contained

10  $\mu$ L solution A, 7.5  $\mu$ L solution B, 20 U RNase inhibitor, and 250 ng DNA, unless specifically stated otherwise. When needed, between 0  $\mu$ M and 250  $\mu$ M AI-2 or 0.5 mM of *S*-adenosyl-L-homocysteine (SAH) was added to the solution. The constructs designed to express parts of the quorum pathways of *P. aeruginosa* and *V. fischeri* used either a cell-free *E. coli* S30 extract for circular DNA (Promega) (20  $\mu$ L premix, 15  $\mu$ L S30 extract, 5  $\mu$ L amino acids mix, 40 U of RNase inhibitor, and 2  $\mu$ g of DNA) or the *E. coli* S30 T7 High Yield Protein Expression System (Promega) (20  $\mu$ L S30 premix, 18  $\mu$ L T7 S30 extract, 40 U of RNase inhibitor, and 1  $\mu$ g of DNA). When needed, 10  $\mu$ M of 3OC12 HSL, C8 HSL, 3OC6 HSL, or C4 HSL (Sigma Aldrich or Cayman Chemical) were added to induce expression, or 300  $\mu$ M of acetyl coenzyme A and 0.5 mM of *S*-adenosyl-L-methionine (SAM) were added for the synthesis of *N*-Acyl homoserine lactones. Reactions were incubated at 37 °C for 4 h to 6 h. In vitro reactions assembled for the sensing of 3OC12 HSL were shaken (50 s orbital shaking, 1 mm orbital amplitude prior to fluorescence acquisition every min) in 384 microwell plates (781076 Greiner Bio One) during incubation in an Infinite m200 plate reader (Tecan). Negative controls were the same reactions in the absence of quorum molecules. Fluorescence was either measured with a Photon Technology International (PTI) QuantaMaster 40 UV-vis spectrofluorometer or a CFX96 Touch Real-Time PCR Detection System (Bio-Rad).

**Enzymatic production of AI-2.** AI-2 was enzymatically produced *in vitro* with 12  $\mu$ M of the purified fusion protein HLPT<sup>1</sup> and 5 mM of *S*-adenosyl-L-homocysteine. Reactions were incubated overnight at 37 °C, 220 RPM. The protein was then removed by two chloroform extractions. The aqueous phase contained AI-2. Since the enzymatic reaction produces in a 1:1 ratio AI-2 and homocysteine, AI-2 was indirectly quantified using 5,5'-dithio-bis(2-nitrobenzoic acid) (DTNB).

The solution for quantification contained 10  $\mu\text{L}$  of sample, 100  $\mu\text{L}$  of Tris-HCl, pH 8, 50  $\mu\text{L}$  of 2 mM DTNB, 50  $\mu\text{M}$  sodium acetate, and 840  $\mu\text{L}$  of water. After 5 min of incubation at room temperature, the absorbance at 412 nm was measured and the concentration of homocysteine was calculated by using the molar extinction coefficient ( $13,600 \text{ M}^{-1}\text{cm}^{-1}$ ) of the reaction product 5-thio-2-nitrobenzoic acid (TNB).

**Vesicle stability.** To test whether bacteria could break phospholipid vesicles, a dye leakage assay<sup>2</sup> was performed. Dehydrated aliquots of 1:2 POPC:cholesterol vesicles<sup>11</sup> were hydrated with 60  $\mu\text{L}$  S30 *E. coli* extract for circular DNA template (Promega) supplemented with 4  $\mu\text{g}$  of DNA (RL081A), 1 mM S-adenosyl methionine, 700  $\mu\text{M}$  acetyl coenzyme A, and 80 mM calcein (Sigma). The vesicles were then extruded through a polycarbonate membrane with 1  $\mu\text{m}$  pores (Whatman) with an Avanti mini-extruder and purified with a sepharose 4B (Sigma-Aldrich) column. Fluorescence was monitored with excitation and emission at 495 nm and 515 nm, respectively. Subsequently, 0.3% (v/v) Triton X-100 was added as a control to break the vesicles.

**The effect of cholesterol on chemical communication.** Dehydrated aliquots of POPC vesicles with either 0 mol%, 10 mol%, or 66 mol% cholesterol were hydrated with 50  $\mu\text{L}$  S30 *E. coli* extract for circular DNA template (Promega) supplemented with 4  $\mu\text{g}$  of DNA (NY013A), 1 mM S-adenosyl-L-methionine, and 700  $\mu\text{M}$  acetyl coenzyme A. The experiments were run as described below in the cellular Turing test section.

**Artificial cells that sense 3OC6 and C8 HSL.** Aliquots of 1:2 POPC:cholesterol vesicles were formed as previously described<sup>3</sup>. 100  $\mu$ L aliquots were rehydrated with 50  $\mu$ L of S30 *E. coli* extract containing 20  $\mu$ L S30 premix, 15  $\mu$ L S30 extract, 5  $\mu$ L amino acids mixture, 40 U of RNase inhibitor, and 4  $\mu$ g of DNA (RL082A, RL093A or RL094A, see Table S5 for sequences). Vesicles were diluted 1:1 with LB supplemented with 0.7 mg/mL proteinase K, 0.07 mg/mL RNase A, and 170 U/mL RNase T1 (Thermo Fisher Scientific) to remove any residual activity in the extravesicular solution. Reactions were incubated at 30 °C for 4 h. For sensing of externally added 3OC6 HSL, 1  $\mu$ M of synthetic 3OC6 HSL or C8 HSL (Cayman Chemical) was added to the artificial cells. For the sensing of *V. fischeri*, bacteria were first grown from 200  $\mu$ L of a glycerol stock at 30 °C in LBS until OD<sup>600</sup> = 1.8. The bacteria were then pelleted, and the supernatant filtered through a 0.2  $\mu$ m membrane (Sartorius). The supernatant (100  $\mu$ L) was then mixed with 50  $\mu$ L of artificial cells. LBS was used as a negative control in place of the *V. fischeri* supernatant. Samples were incubated at 30 °C for 4 h, then the artificial cells were collected and loaded into 96 well plates. 0.3% (v/v) Triton X-100 was added to break the vesicles, and 150  $\mu$ L of the luciferase assay reagent (Promega) was added to the samples. Luminescence was recorded immediately with a plate reader (Tecan).

**Artificial sender cells.** Dehydrated aliquots of 1:2 POPC:cholesterol vesicles<sup>3,4</sup> were hydrated with 50  $\mu$ L of S30 T7 High-Yield Protein Expression System supplemented with 2  $\mu$ g of DNA encoding the corresponding synthase behind a T7 promoter (constructs MC001A, MC002A, MC003A, NY018A, NY019A and JF005A, Table S5). For the production of acyl homoserine lactones, 1 mM *S*-adenosyl-L-methionine and 700  $\mu$ M acetyl coenzyme A were added. The

production of AI-2 required 1 mM S-adenosyl-L-homocysteine. For the experiment corresponding to Figure 2A, artificial cells were diluted 1:3 in buffer A (50 mM HEPES, 10 mM MgCl<sub>2</sub>, 100 mM KCl, pH 7.6) plus 0.7 mg/mL proteinase K. Reactions were incubated at 37 °C for 6 h. In the meantime, the corresponding *E. coli* reporter strain was grown from one colony in LB supplemented with antibiotic until OD<sup>600 nm</sup> = 0.5. Bacteria were pelleted, resuspended in fresh LB, and added to artificial cells to a final OD<sup>600 nm</sup> = 0.1. Samples were incubated at 37 °C. Aliquots were removed every hour, diluted in PBS, and monitored by flow cytometry with a FACS canto A (BD biosciences). Positive controls contained 0.1 μM of the corresponding quorum molecule. LB was added in place of quorum molecules for the negative control. Parameters for each flow cytometry experiment were: Forward scatter (FSC) signal (Ex.: 488 nm, Type: Area, Voltage: 525); Side scatter (SSC) signal (Ex.: 488 nm, Em.: 488 +/- 10 nm, Type: Area, Width, Voltage: 403) Green channel (FITC) signal (Ex.: 488 nm, Em.: 530 +/- 30 nm, Type: Area, Voltage: 600); Threshold parameters (FCS: 200, SSC: 200, Threshold operator: And). For the experiment corresponding to Figure 2B, artificial sender cells were diluted 1:1 with *V. fischeri* MJ11 at OD<sup>600</sup>=0.2-0.3 and 0.7 mg/mL Proteinase K, 0.07 mg/mL RNase A, and 170 U/mL RNase T1 (Thermo Fisher Scientific) were also added to avoid any residual activity of the S30 reactions outside the artificial cells. Samples were incubated at 30 °C in 96-well plates (Thermo Fischer Scientific, 216305) without shaking. Every hour luminescence was measured with an Infinite M200 plate reader (Tecan). After 3 h of incubation, 5 μL of each sample were serially diluted and 10 μL of the 10<sup>-5</sup> fold dilution were plated on LBS agar following the “track dilution” method to enumerate the colony forming units (CFU) with one plating per sample per experiment. Pictures from luminescent bacteria colonies were captured in a dark room with an Olympus OM-D EM5 camera and a M-Zuiko ED

12-50 mm 1:3.5-6.3 EZ lens using an exposure of 40 s at F 5 and an ISO of 200. Negative control were liposomes encapsulating the S30 extract without DNA. For the experiment corresponding to Figure 2C, AI-2 was detected with *V. harveyi* BB170, a strain that can naturally sense AI-2 but has been engineered to not sense its own autoinducer *N*-(3-oxobutanoyl)homoserine lactone. The assay was performed as described by Vilchez et al<sup>5</sup>. Briefly, *V. harveyi* was grown overnight from a 200  $\mu$ L glycerol stock in AB medium supplemented with 50  $\mu$ g/mL kanamycin at 30 °C, 220 RPM. The day after, bacteria were diluted to  $OD^{600\text{ nm}} = 0.7$  and grown for 1.5 h (to  $OD^{600\text{ nm}} = 1.1$ ) in AB medium. The culture was then diluted 1:5000 and 90  $\mu$ L were loaded into a white 96-well plate (Nunc). 10  $\mu$ L of sample was added to each well. AB medium was used as a blank, and 100  $\mu$ M of enzymatically produced AI-2 was used as a positive control. AI-2 activity was calculated by dividing the sample value by the blank. Plates were incubated at 30 °C and luminescence was monitored with Infinite M200 plate reader plate reader (Tecan) after 3 h.

**Artificial cells that mediate communication with two different cell types.** *E. coli* reporter strains were grown to  $OD^{600\text{ nm}} = 0.5$  from one colony in LB supplemented with antibiotic. Bacteria were pelleted and resuspended in fresh LB. Dehydrated aliquots<sup>3</sup> of 1:2 POPC cholesterol vesicles were hydrated with 50  $\mu$ L *E. coli* S30 extract for circular DNA supplemented with 4  $\mu$ g of DNA encoding a 3OC6 HSL sensing device and the corresponding synthase (NY016A, RL079A, or RL080A, Table S5). 1 mM of *S*-adenosyl-L-methionine and 700  $\mu$ M of acetyl coenzyme A were added for the synthesis of acyl homoserine lactones and 1 mM of SAH for the production of AI-2. When commercial 3OC6 HSL was used, 1  $\mu$ M of 3OC6 HSL was added to 50  $\mu$ L of artificial cells mixed with 50  $\mu$ L of the corresponding *E. coli* reporter strain at a final  $OD^{600\text{ nm}} = 0.1$ . 0.7 mg/mL

of proteinase K were added, and the samples were incubated at 37 °C. Aliquots were collected after every hour, diluted in PBS, and monitored by flow cytometry. When the presence of *V. fischeri* 7744 was sensed, bacteria were grown at 28 °C in LBS supplemented with ampicillin until  $OD^{600} = 1.2$ . Cells were harvested and the supernatant mixed with 50  $\mu$ L of artificial cells and 50  $\mu$ L of the *E. coli* reporter strain. Samples were incubated at 37 °C. Aliquots were collected each hour, diluted in PBS, and monitored by flow cytometry. Positive controls contained 0.1 mM of 3OC12 HSL. Negative controls were in the absence of supplemental quorum molecules or *V. fischeri* supernatant. Unspecific fluorescence was determined by adding the supernatant of *V. fischeri* to the *E. coli* reporter strain. Samples collected at 6 h were analyzed with BD FACSDiva software. For AI-2 synthesis, samples were mixed with *V. harveyi* BB170, following the protocol described above for the *V. harveyi* bioluminescence assay.

**Quorum quenching.** Dehydrated aliquots of 1:2 POPC:cholesterol vesicles<sup>3</sup> were hydrated with 50  $\mu$ L of S30 *E. coli* extract supplemented with 4  $\mu$ g of DNA encoding AiiA behind a tet promoter or a 3OC6-C8 HSL responsive-AiiA production device. 1 U of DNaseI (Thermo Fisher Scientific), 0.07 mg/mL RNaseA, and 170 U/mL of RNase T1 (Thermo Fisher Scientific) were added to the extravesicular solution to remove any residual activity of the S30 *E. coli* extract outside of the artificial cells. When necessary, 1  $\mu$ M of 3OC6 HSL and 1  $\mu$ M of C8 HSL or an aliquot of a *V. fischeri* culture at  $OD^{600\text{ nm}} = 0.2$  were added to the outside of the vesicles. Reactions were incubated at 37 °C for 4 h. *P. aeruginosa* was grown from 200  $\mu$ L of a glycerol stock in LB until  $OD^{600\text{ nm}} = 0.3$  and added to artificial cells in a 1:1 ratio. After 2 h of incubation at 37 °C at 220 RPM, cells were harvested and the supernatants mixed 1:20 with the 3OC12 HSL *E. coli* sensor strain. Samples



were incubated at 37 °C. 2 µL were collected every hour, diluted 1:100 in PBS, and monitored by flow cytometry. Controls were performed by adding to the reporter strain a culture of *P. aeruginosa* grown in LB and with *V. fischeri* supernatant to monitor unspecific interaction. The positive control was the addition of 0.1 µM 3OC12 HSL to the *E. coli* reporter strain. Negative controls included samples without added quorum molecules. Samples were collected at 2 h and analyzed with BD FACSDiva software. The population distribution was analyzed and plotted with FlowJo software.

**Cellular Turing test.** Dehydrated aliquots of 1:2 POPC:cholesterol vesicles<sup>3</sup> were hydrated with 50 µL S30 *E. coli* extract for circular DNA template (Promega) supplemented with 4 µg of DNA, 1 mM S-adenosyl-L-methionine, and 700 µM acetyl coenzyme A. 200 µL glycerol stock of exponential phase *V. fischeri* MJ11 were grown in 5 mL of LBS (30 °C, 145 rpm) until  $OD^{600\text{ nm}} = 0.2-0.3$ . Cells were undiluted or mixed in a 1:1 ratio with either functional artificial cells encapsulating DNA plasmids (RL078A, NY009A, NY013A, or NY014A) coding for the different versions of *luxR* and the *luxI* or nonfunctional artificial cells containing DNA plasmid (RL081A) coding for *luxR* and T7 RNA polymerase. Extravesicle solutions contained 0.7 mg/mL Proteinase K, 0.07 mg/mL RNase A, and 170 U/mL RNase T1 (Thermo Fisher Scientific) to avoid any residual activity of the S30 *E. coli* extract outside of the artificial cells. Samples were incubated at 30 °C in 96-well plates (Thermo Fisher Scientific, 216305) without shaking. Every hour luminescence was measured with an Infinite M200 plate reader (Tecan). After 3 h of incubation, 5 µL of each sample were serially diluted and 10 µL of the  $10^{-5}$  fold dilution were plated on LBS agar following the “track dilution” method to enumerate the colony forming units (CFU)<sup>6</sup> with one plating per

sample per experiment. Pictures from luminescent bacteria colonies were captured in a dark room with an Olympus OM-D EM5 camera and a M-Zuiko ED 12-50 mm 1:3.5-6.3 EZ lens using an exposure of 40 s at F 5 and an ISO of 200. Noise reduction and an exposure setting of +1.0 EV were applied on the JPEG image files in Adobe Photoshop lightroom CC 2016 prior the cell counting. A crop of one of the resulting images is shown in (Figure S10). Single colonies were then counted manually. Subsequently, the rest of the samples were collected for RNA extraction. Total RNA was isolated with the GeneJET RNA Purification Kit (Thermo Fischer Scientific), and 500 ng of RNA was retro transcribed using the RevertAid Reverse Transcriptase kit (Thermo Fischer Scientific). 5 ng of cDNA was mixed with the iQ SYBR Green supermix (Bio-Rad) and supplemented with the appropriate primers. 10  $\mu$ L reactions were loaded in 96-well plates (HSP9655 Bio-Rad), and the cDNA was quantified with a CFX96 Touch real-time PCR (Bio-Rad) with SYBR green detection. The real-time PCR run protocol was one initial cycle of denaturation at 95  $^{\circ}$ C for 3 min followed by 40 cycles of denaturation (95  $^{\circ}$ C, 10 s) and annealing + extension (60  $^{\circ}$ C, 30 s) followed by one melt curve cycle (55-95  $^{\circ}$ C with 0.5  $^{\circ}$ C, 40 s). The primers to quantify the gene expression of *luxA* and *luxB* were *luxA* FW: 5'-cagagtttggctcttacgggaaat-3' (150 nM), *luxA* REV: 5'-gggtgtgctgtcgggaataac-3' (150 nM), *luxB* FW: 5'-attaccaccatcacctgt-3' (250 nM), *luxB* REV: 5'-gtcactaaaaccaagaatgaagcg-3' (250 nM). Gene expression was normalized to the expression of the malate dehydrogenase (*mdh*) housekeeping gene that was amplified with the following primers *mdh* FW: 5'-cactctggtgttactatcttacctct-3' and *mdh* REV: 5'-acttctgttcccgcattttgg-3' (300 nM). Primers were designed with Primer3 software.

For RNA-seq analysis, total RNA was treated with DNase (RapidOut DNA Removal kit, ThermoFisher) prior to RNA quantification with a spectrofluorometric detection method using the Quantum-iT RiboGreen RNA assay kit (Life-Technologies). Library preparation and sequencing were performed at Edinburgh Genomics (Ashworth laboratories, University of Edinburgh). Briefly, libraries were prepared using the TruSeq stranded total RNA-seq kit (Illumina) and the depletion of ribosomal RNAs was accomplished with the RiboZero rRNA removal kit for Gram negative bacteria (Illumina). Libraries were then sequenced on one lane of an Illumina HiSeq2500 in high output mode with v4 chemistry to a length of 125 base paired end. The quality of the raw sequence data was assessed with FastQC<sup>7</sup>. The average number of reads were 10,397,486, 11,006,173, and 11,077,471 for samples containing functional artificial cells, nonfunctional artificial cells, and no artificial cells, respectively. Reads in FASTQ format were mapped to the *V. fischeri* MJ11 genome reference sequence using bowtie<sup>8</sup>. Transcripts were assembled with cufflink and cuffmerge and the quantification of isoforms was with cuffdiff<sup>9-11</sup>. The sample size for the RNA-seq experiments was chosen based on the average number of reads per sample (10M), read length (200bp), preliminary results, and prior reports<sup>12</sup> showing an effect size of at least two for *lux* operon gene expression from activation by quorum sensing. Therefore, to ensure a statistical power of at least 0.8 at a significance level of 0.05 for a standard two-tailed t-test, the sample size was set to six. Differences in the mean between groups were assessed using an unpaired two-tailed standard t-test. Standard deviations are shown in the bar plots as a measure of variability. RNA-seq differentially expressed genes are determined by cufflinks/cuffdiff after *p* value adjustment for multiple comparisons using FDR (False Discovery Rate). The functional and

clusterization analysis for the three sets of differently expressed coding sequences was with DAVID<sup>13</sup>. The Benjamini test threshold was set to  $10^{-2}$ .

## SUPPORTING FIGURES

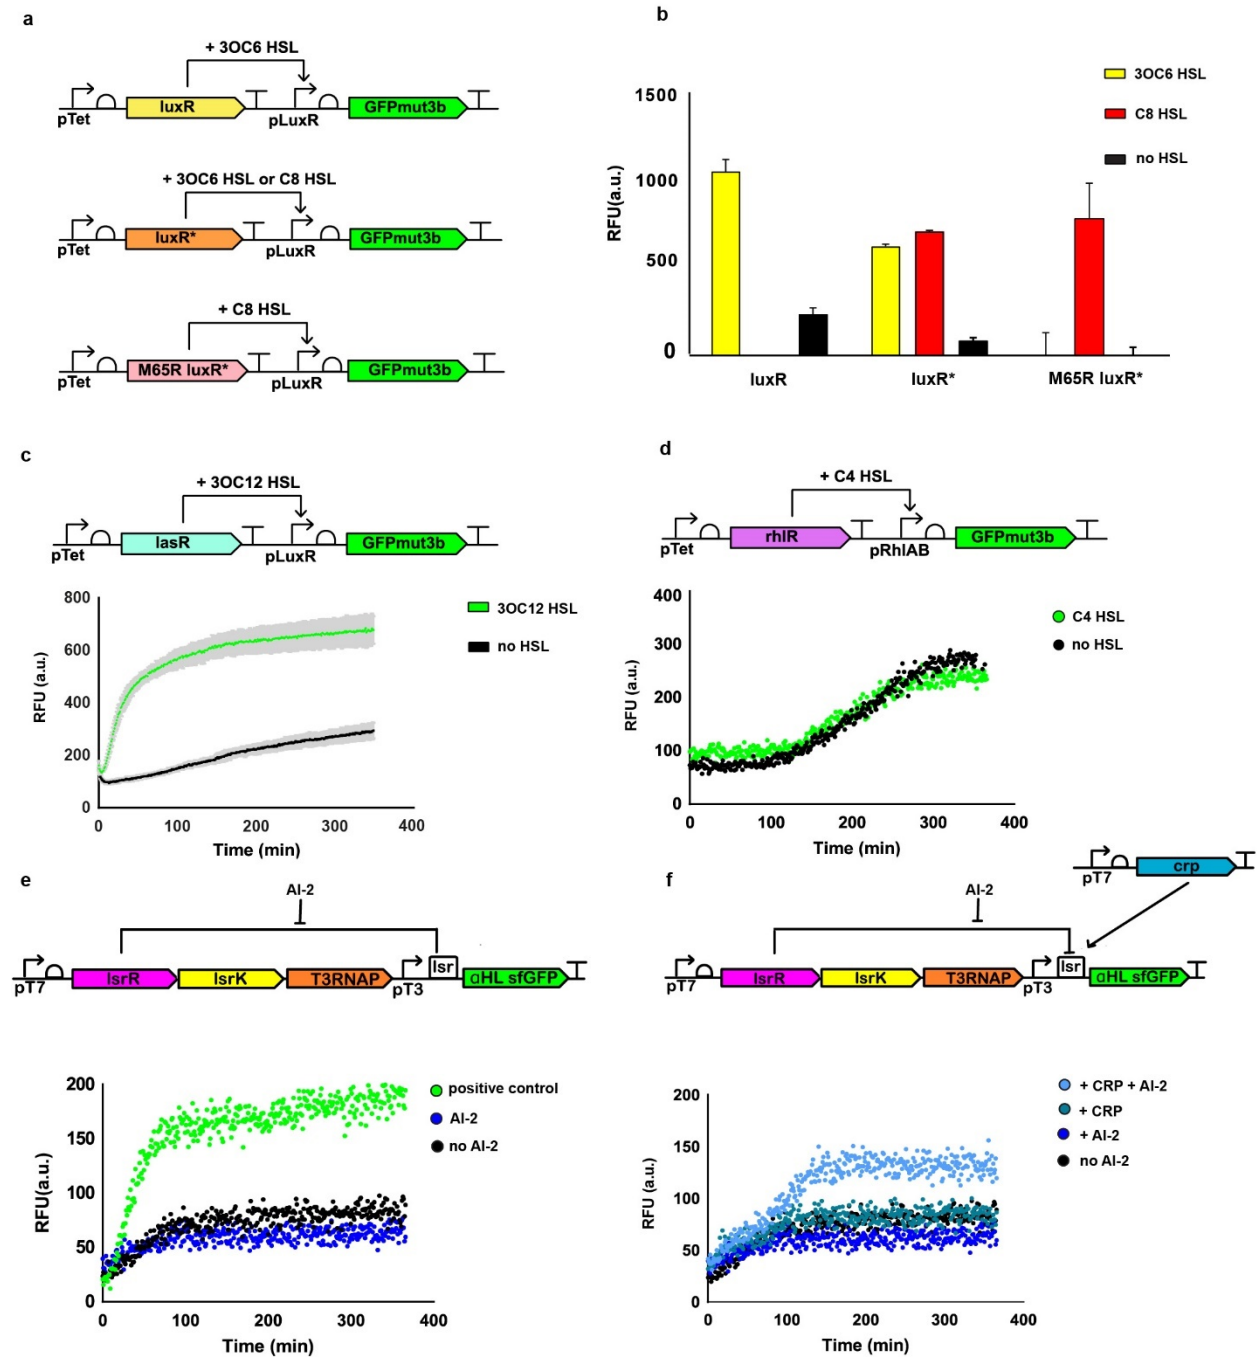

**Figure S1. *In vitro* sensing of quorum molecules.** (a) A schematic illustration of the genetic constructs for the sensing of 3OC6 HSL, 3OC6 HSL and C8 HSL, and C8 HSL is illustrated. (b) LuxR controlled *in vitro* expression of GFP was monitored by fluorescence spectroscopy for the genetic

constructs shown in panel a ( $n=3$  biological replicates, mean  $\pm$  s.d.). (c) DNA encoding *lasR* for the sensing of 3OC12 HSL controlled the expression of GFP ( $n=3$  biological replicates, mean  $\pm$  s.d.). (d) The C4 HSL responsive, *rhII* encoding construct was expressed *in vitro* ( $n=2$  technical replicates). (e) The genetic circuit for sensing AI-2 was expressed with the PURE system ( $n=2$  technical replicates). (f) CRP was added to the AI-2 sensing genetic circuit ( $n=2$  technical replicates). RFU (Relative Fluorescence Units).

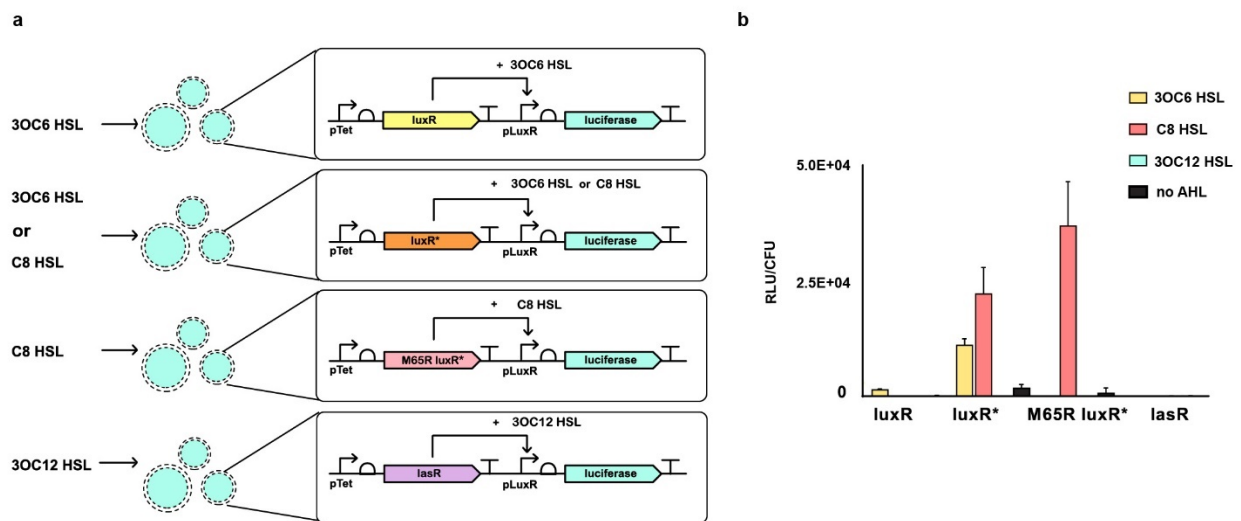

**Figure S2. Artificial cells sense quorum molecules.** Artificial cells carrying genetic constructs for the sensing of quorum molecules (a) were incubated with the corresponding HSL and monitored by luminescence (b) ( $n=3$  technical replicates, mean  $\pm$  s.d.). RLU/CFU (Relative luminescence Units/ Colony Forming Units per milliliter).

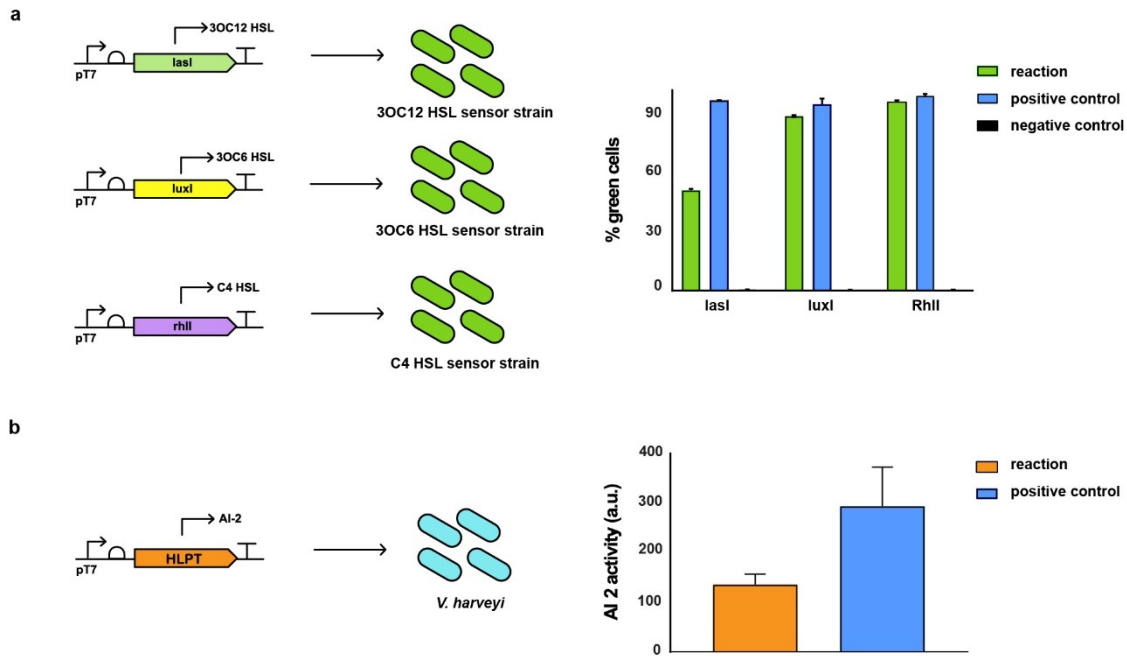

**Figure S3. *In vitro* production of quorum sensing molecules.** (a) Genetic constructs for the synthesis of 3OC12 HSL, 3OC6 HSL, and C4 HSL were expressed *in vitro*. After 6 h, samples were incubated with *E. coli* sensor strains and quantified by flow cytometry ( $n=3$  technical replicates, mean  $\pm$  s.d.). (b) Genetic constructs expressing the AI-2 synthesizing, HLPT fusion protein<sup>1</sup> were expressed *in vitro*. After 6 h, samples were incubated with *V. harvey* BB170 and the luminescence (referred to as AI-2 activity) was measured. Samples were normalized against reactions without a DNA template ( $n=3$  technical replicates, mean  $\pm$  s.d.).

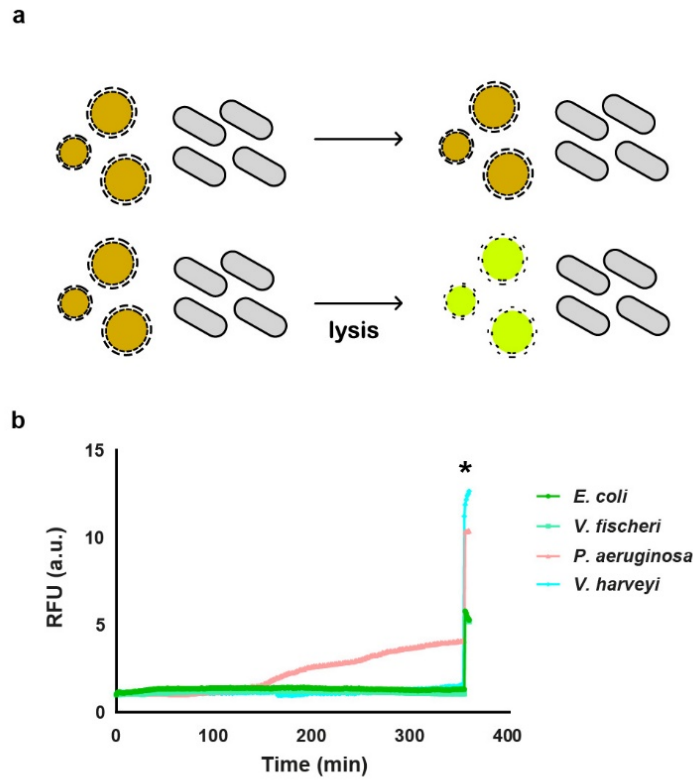

**Figure S4. Artificial cell leakage assay.** (a) Artificial cells supplemented with the self-quenching fluorophore calcein were incubated with different bacteria and monitored by fluorescence spectroscopy for 6 h. (b) *E. coli*, *V. fischeri*, and *V. harveyi* did not degrade the artificial cells under the same test conditions used for the chemical communication experiments, whereas the presence of *P. aeruginosa* compromised the integrity of the membrane. \* indicates the addition of 0.3% (v/v) Triton X-100. RFU (Relative Fluorescence Units).



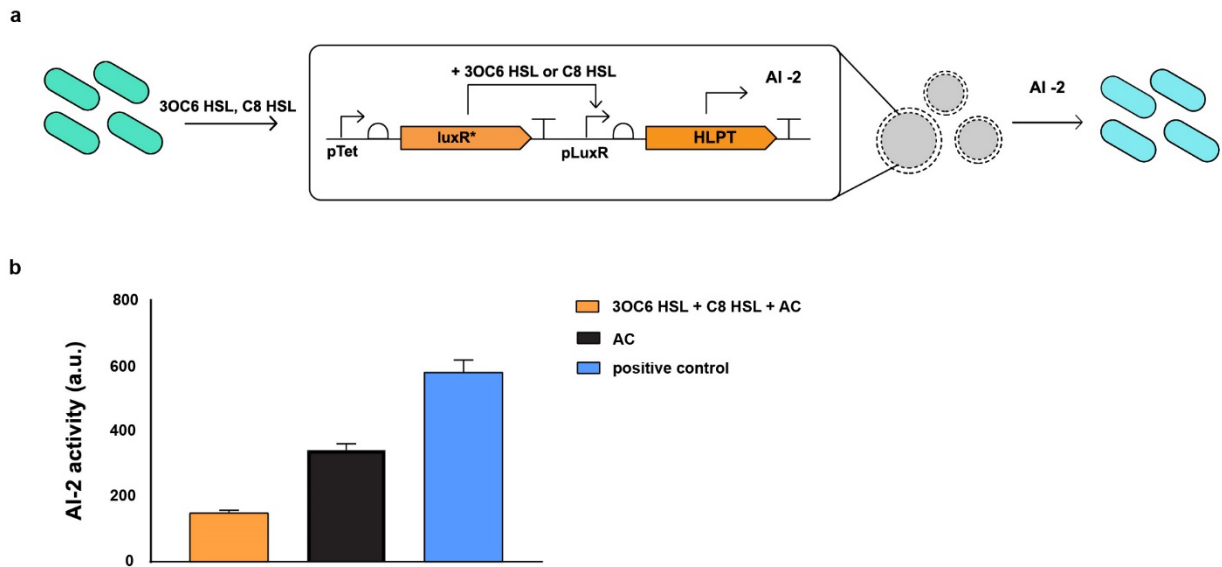

**Figure S5. Artificial cells failed to produce AI-2 in response to quorum sensing molecules.** (a) Artificial cells carrying a genetic construct to produce AI-2 in response to 3OC6 HSL and C8 HSL were incubated at 30 °C for 6 h. (b) Artificial cells were then mixed with *V. harveyi* BB170 and luminescence was monitored after 3 h ( $n=3$  technical replicates, mean  $\pm$  s.d.).

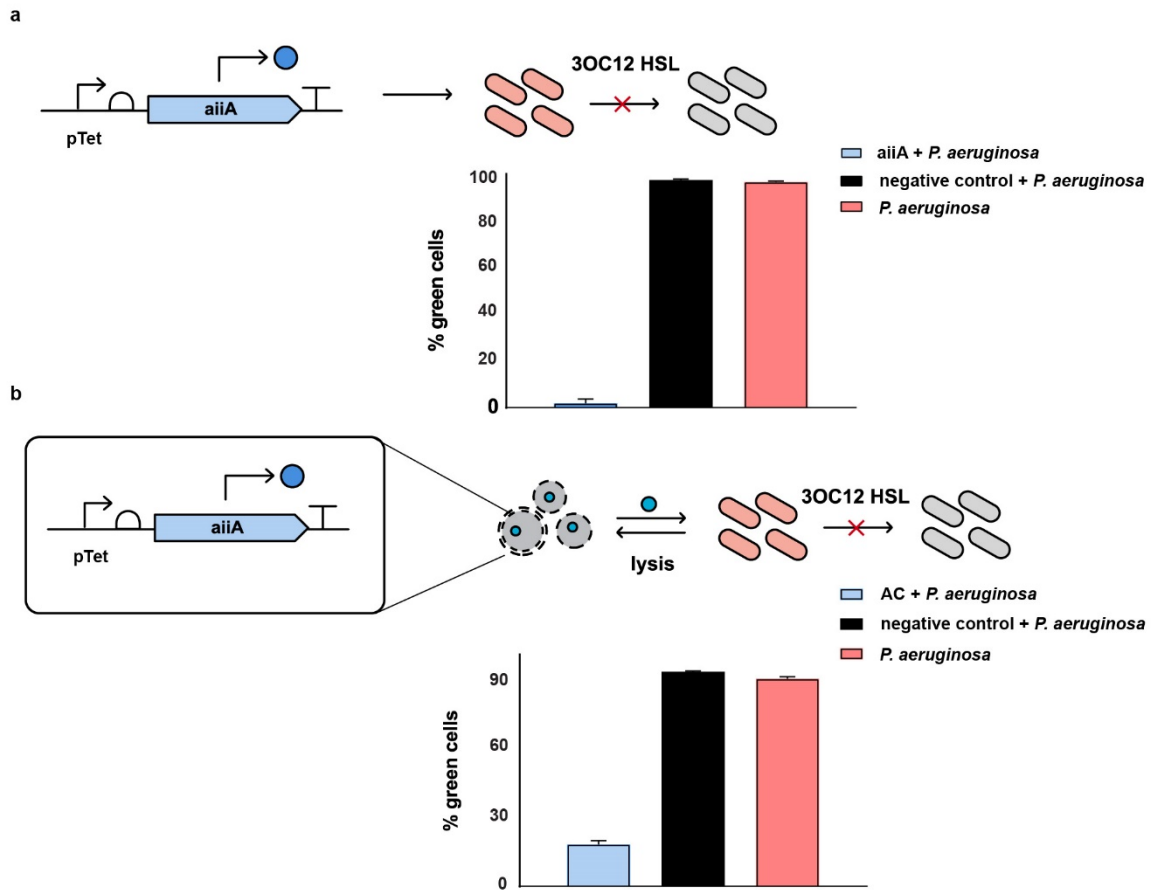

**Figure S6. Artificial cells quench *P. aeruginosa* quorum sensing.** (a) *In vitro* expressed AiiA was sufficient to degrade the 3OC12 HSL released by *P. aeruginosa*. 3OC12 HSL levels were assessed by flow cytometry of an *E. coli* reporter strain ( $n=3$  technical replicates, mean  $\pm$  s.d.). (b) Artificial cells carrying the same construct in panel a were capable of degrading *P. aeruginosa* secreted 3OC12 HSL ( $n=3$  biological replicates, mean  $\pm$  s.d.).

a

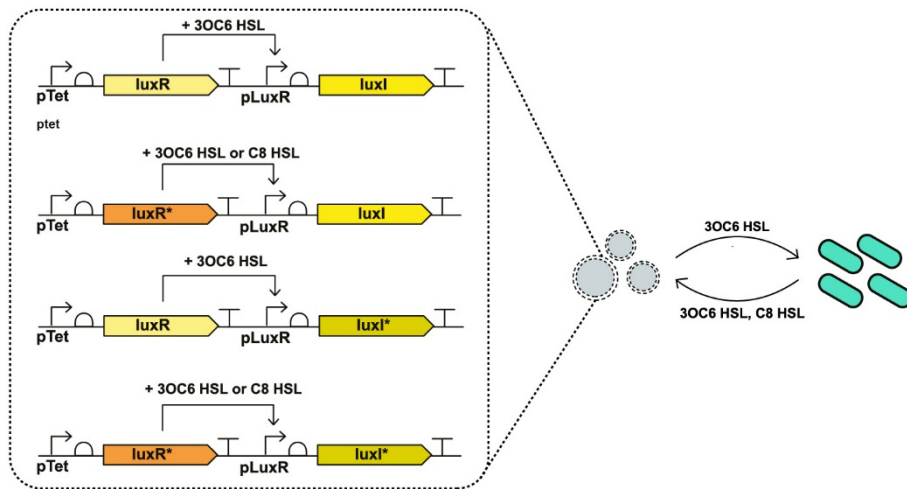

b

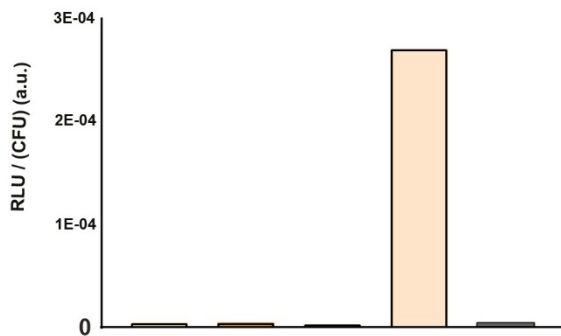

c

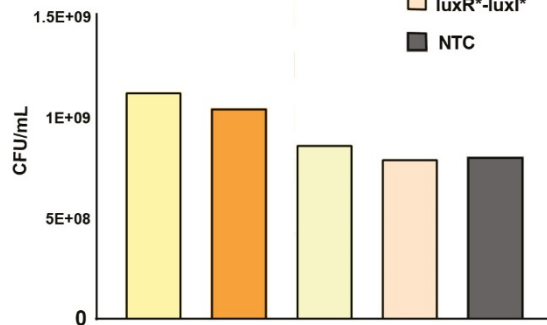

**Figure S7. Screening of genetic constructs for the cellular Turing test.** (a) A schematic illustration of the four genetic constructs tested for their ability to sense and produce 3OC6 HSL. (b) Luminescence data were acquired after 3 h of incubation of artificial cells with *V. fischeri* ( $n=1$ ). (c) The number of viable cells per sample was determined by measuring the colony forming units ( $n=1$ ). RLU/CFU (Relative Luminescence Units/Colony Forming Units per milliliter), CFU/mL (Colony Forming Units per milliliter).

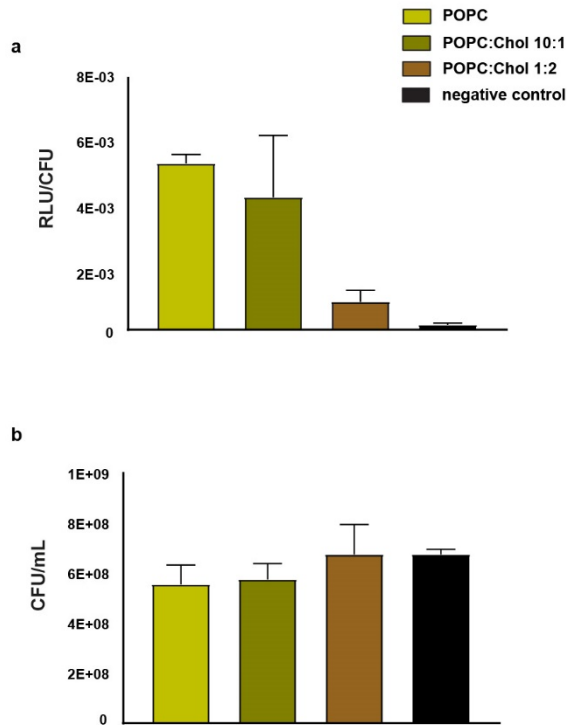

**Figure S8.** Influence of cholesterol on chemical communication. Artificial cells with different membrane compositions (POPC, 10:1 POPC:cholesterol, 1:2 POPC:cholesterol) containing DNA encoding LuxR\* and LuxI\* (NY013A) was incubated with *V. fischeri*. (a) The luminescent response per single cell of *V. fischeri* after 3 h showed a clear dependence on the concentration of cholesterol. (b) The number of viable *V. fischeri* cells per sample was determined by measuring the colony forming units. The negative control was an unencapsulated S30 reaction containing the same DNA and necessary components for transcription-translation. RLU/CFU (Relative Luminescence Units/Colony Forming Units per milliliter), CFU/mL (Colony Forming Units per milliliter).

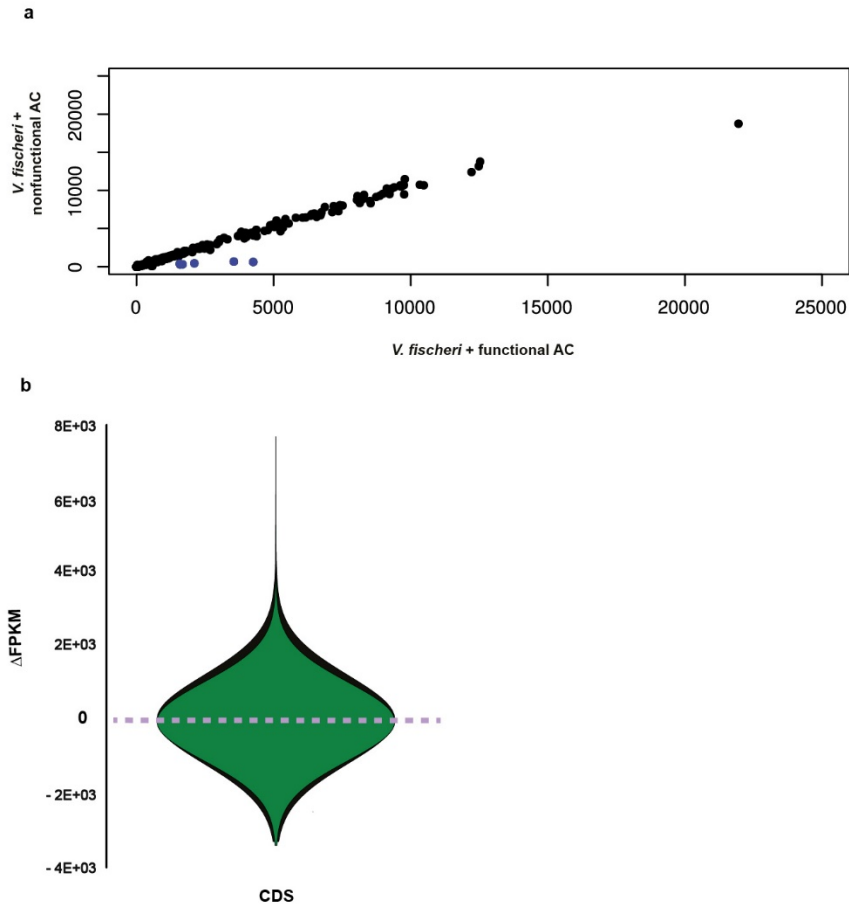

**Figure S9. RNA sequencing data.** (a) The correlation of *V. fischeri* gene expression in response to nonfunctional and functional artificial cells was highly correlated,  $r=0.99$ . Blue dots depict the genes falling off the correlation trend, including six out of the seven genes of the *lux* operon. (b) Distribution of the difference in FPKM per coding sequence between *V. fischeri*–*V. fischeri* with *V. fischeri*–functional artificial cells (green) and *V. fischeri*–*V. fischeri* with *V. fischeri*–nonfunctional artificial cells (black). FPKM (fragments per kilobase of transcript per million mapped reads), CDS (Coding DNA Sequences).

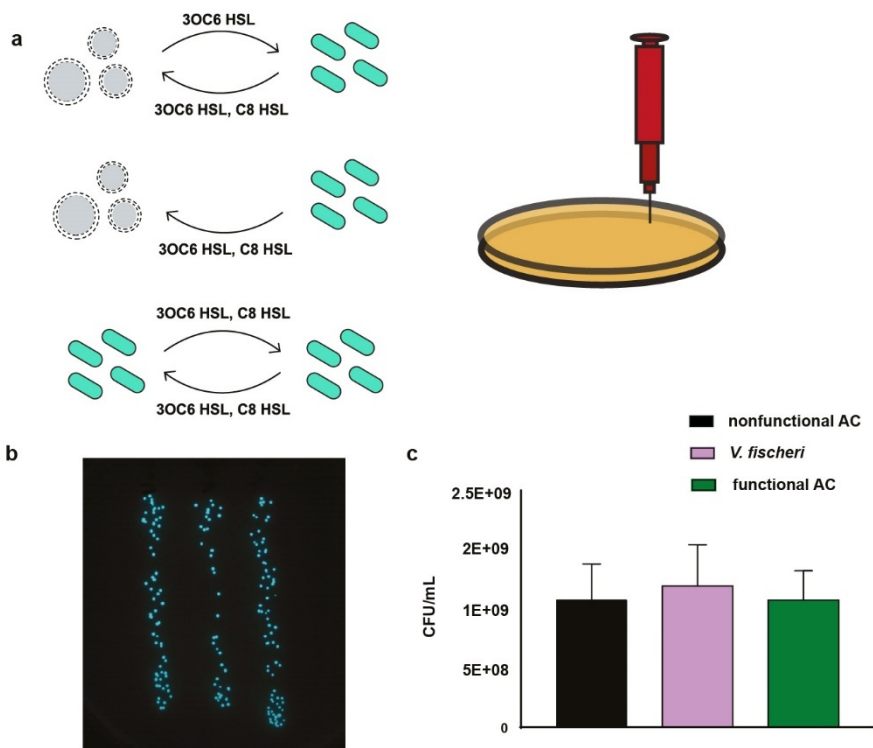

**Figure S10. Determining the viable *V. fischeri* count for the cellular Turing test experiments. (a)**

A schematic illustration of the samples used for CFU enumeration. The number of cells was determined by track dilution with one plating per sample per experiment. (b) A representative picture of a plated sample of bacterial colonies used to calculate CFU. (c) No significant differences in number of viable cells were observed among the samples. ( $n=6$  biological replicates, mean  $\pm$  s.d.). CFU/mL (Colony Forming Units per milliliter).

## SUPPORTING TABLES

**Table S1.** Enrichment analysis of the 81 differently expressed coding sequences that were commonly found for *V. fischeri* + functional artificial cells and *V. fischeri* + nonfunctional artificial cells with respect to *V. fischeri* + *V. fischeri*. Highlighted in grey are the significantly enriched ten gene sets with  $FDR < 10^{-2}$ .

| Category        | Term                                                     | Count | %    | PValue    | Genes                                                                           | List Total | Pop Hits | Pop Total | Fold Enrichment | Bonferroni | Benjamini | FDR      |
|-----------------|----------------------------------------------------------|-------|------|-----------|---------------------------------------------------------------------------------|------------|----------|-----------|-----------------|------------|-----------|----------|
| GOTERM_BP_FAT   | GO:0006525~arginine metabolic process                    | 8     | 10   | 3.3E-09   | 5096830, 5094984, 5098318, 5095180, 5093155, 5097146, 5095530, 5098218          | 46         | 17       | 2757      | 28.2            | 4.92E-07   | 4.92E-07  | 3.91E-06 |
| GOTERM_BP_FAT   | GO:0000103~sulfate assimilation                          | 6     | 7.5  | 4.99E-08  | 5096365, 5094445, 5099740, 5100074, 5099138, 5096397                            | 46         | 8        | 2757      | 44.95           | 7.48E-06   | 3.74E-06  | 5.96E-05 |
| KEGG_PATHWAY    | vfm00920: Sulfur metabolism                              | 7     | 8.75 | 3.251E-07 | 5096365, 5094445, 5096432, 5099740, 5100074, 5099138, 5096397                   | 40         | 14       | 1634      | 20.43           | 1.69E-05   | 1.69E-05  | 3.16E-04 |
| SP_PIR_KEYWORDS | amino-acid biosynthesis                                  | 9     | 11.2 | 7.588E-07 | 5099805, 5096830, 5098318, 5097146, 5096432, 5095530, 5098218, 5099138, 5096397 | 80         | 68       | 7033      | 11.64           | 4.25E-05   | 4.25E-05  | 7.49E-04 |
| KEGG_PATHWAY    | vfi00330: Arginine and proline metabolism                | 9     | 11.2 | 9.292E-07 | 5096830, 5094984, 5098318, 5095180, 5093155, 5097146, 5095995, 5095530, 5098218 | 40         | 36       | 1634      | 10.21           | 4.83E-05   | 2.42E-05  | 9.03E-04 |
| SP_PIR_KEYWORDS | arginine biosynthesis                                    | 5     | 6.25 | 1.781E-06 | 5096830, 5098318, 5097146, 5095530, 5098218                                     | 80         | 9        | 7033      | 48.84           | 9.97E-05   | 4.99E-05  | 1.76E-03 |
| KEGG_PATHWAY    | vfm00330: Arginine and proline metabolism                | 9     | 11.2 | 1.794E-06 | 5096830, 5094984, 5098318, 5095180, 5093155, 5097146, 5095995, 5095530, 5098218 | 40         | 39       | 1634      | 9.43            | 9.33E-05   | 3.11E-05  | 1.74E-03 |
| GOTERM_BP_FAT   | GO:0009064~glutamine family amino acid metabolic process | 8     | 10   | 3.955E-06 | 5096830, 5094984, 5098318, 5095180, 5093155, 5097146, 5095530, 5098218          | 46         | 43       | 2757      | 11.15           | 5.93E-04   | 1.98E-04  | 4.72E-03 |
| GOTERM_BP       | GO:00065                                                 | 5     | 6.25 | 4.139E-06 | 5096830,                                                                        | 46         | 8        | 2757      | 37.46           | 6.21E-04   | 1.55E-04  | 4.94E-03 |



| Category         | Term                                                        | Count | %    | PValue   | Genes                                                                                                               | List Total | Pop Hits | Pop Total | Fold Enrichment | Bonferroni | Benjamini | FDR      |
|------------------|-------------------------------------------------------------|-------|------|----------|---------------------------------------------------------------------------------------------------------------------|------------|----------|-----------|-----------------|------------|-----------|----------|
| _FAT             | 26~arginine biosynthetic process                            |       |      |          | 5098318, 5097146, 5095530, 5098218                                                                                  |            |          |           |                 |            |           |          |
| GOTERM_BP_FAT    | GO:0006790~sulfur metabolic process                         | 8     | 10   | 2.73E-05 | 5099805, 5096365, 5094445, 5096432, 5099740, 5100074, 5099138, 5096397                                              | 46         | 57       | 2757      | 8.41            | 4.09E-03   | 8.20E-04  | 3.26E-02 |
| GOTERM_BP_FAT    | GO:0008652~cellular amino acid biosynthetic process         | 10    | 12.5 | 4.90E-05 | 5099805, 5096830, 5098318, 5094445, 5097146, 5096432, 5095530, 5098218, 5099138, 5096397                            | 46         | 110      | 2757      | 5.45            | 7.33E-03   | 1.22E-03  | 5.85E-02 |
| GOTERM_BP_FAT    | GO:0009309~amine biosynthetic process                       | 10    | 12.5 | 6.08E-05 | 5099805, 5096830, 5098318, 5094445, 5097146, 5096432, 5095530, 5098218, 5099138, 5096397                            | 46         | 113      | 2757      | 5.3             | 9.07E-03   | 1.30E-03  | 7.25E-02 |
| SP_PIR_KEY_WORDS | oxidoreductase                                              | 13    | 16.2 | 1.11E-04 | 5099805, 5094200, 5100277, 5095180, 5094467, 5099138, 5097770, 5096140, 5098116, 5094445, 5095530, 5096397, 5093448 | 80         | 299      | 7033      | 3.82            | 6.18E-03   | 2.07E-03  | 1.09E-01 |
| KEGG_PATHWAY     | vfm00020 :Citrate cycle (TCA cycle)                         | 6     | 7.5  | 1.17E-04 | 5094200, 5093157, 5100277, 5097920, 5096543, 5096140                                                                | 40         | 22       | 1634      | 11.14           | 6.05E-03   | 1.52E-03  | 1.13E-01 |
| GOTERM_BP_FAT    | GO:0009084~glutamine family amino acid biosynthetic process | 5     | 6.25 | 1.26E-04 | 5096830, 5098318, 5097146, 5095530, 5098218                                                                         | 46         | 17       | 2757      | 17.63           | 1.88E-02   | 2.37E-03  | 1.51E-01 |
| GOTERM_BP_FAT    | GO:0019344~cysteine biosynthetic process                    | 4     | 5    | 2.15E-04 | 5094445, 5096432, 5099138, 5096397                                                                                  | 46         | 8        | 2757      | 29.97           | 3.17E-02   | 3.58E-03  | 2.56E-01 |

| Category        | Term                                                     | Count | %    | PValue   | Genes                                                                                    | List Total | Pop Hits | Pop Total | Fold Enrichment | Bonferroni | Benjamini | FDR      |
|-----------------|----------------------------------------------------------|-------|------|----------|------------------------------------------------------------------------------------------|------------|----------|-----------|-----------------|------------|-----------|----------|
| KEGG_PATHWAY    | vfi00920: Sulfur metabolism                              | 5     | 6.25 | 2.34E-04 | 5094445, 5096432, 5099740, 5100074, 5096397                                              | 40         | 14       | 1634      | 14.59           | 1.21E-02   | 2.43E-03  | 2.27E-01 |
| GOTERM_BP_FAT   | GO:0000097~sulfur amino acid biosynthetic process        | 5     | 6.25 | 3.03E-04 | 5099805, 5094445, 5096432, 5099138, 5096397                                              | 46         | 21       | 2757      | 14.27           | 4.44E-02   | 4.53E-03  | 3.61E-01 |
| GOTERM_BP_FAT   | GO:0046394~carboxylic acid biosynthetic process          | 10    | 12.5 | 3.58E-04 | 5099805, 5096830, 5098318, 5094445, 5097146, 5096432, 5095530, 5098218, 5099138, 5096397 | 46         | 142      | 2757      | 4.22            | 5.22E-02   | 4.87E-03  | 4.26E-01 |
| GOTERM_BP_FAT   | GO:0016053~organic acid biosynthetic process             | 10    | 12.5 | 3.77E-04 | 5099805, 5096830, 5098318, 5094445, 5097146, 5096432, 5095530, 5098218, 5099138, 5096397 | 46         | 143      | 2757      | 4.19            | 5.50E-02   | 4.70E-03  | 4.49E-01 |
| GOTERM_BP_FAT   | GO:0000096~sulfur amino acid metabolic process           | 5     | 6.25 | 4.38E-04 | 5099805, 5094445, 5096432, 5099138, 5096397                                              | 46         | 23       | 2757      | 13.03           | 6.35E-02   | 5.04E-03  | 5.21E-01 |
| GOTERM_BP_FAT   | GO:0006534~cysteine metabolic process                    | 4     | 5    | 4.50E-04 | 5094445, 5096432, 5099138, 5096397                                                       | 46         | 10       | 2757      | 23.97           | 6.53E-02   | 4.81E-03  | 5.36E-01 |
| GOTERM_BP_FAT   | GO:0009070~serine family amino acid biosynthetic process | 4     | 5    | 8.07E-04 | 5094445, 5096432, 5099138, 5096397                                                       | 46         | 12       | 2757      | 19.98           | 1.14E-01   | 8.04E-03  | 9.59E-01 |
| KEGG_PATHWAY    | vfm00650: Butanoate metabolism                           | 5     | 6.25 | 8.31E-04 | 5099833, 5094200, 5100277, 5097920, 5096543                                              | 40         | 19       | 1634      | 10.75           | 4.23E-02   | 7.18E-03  | 8.05E-01 |
| KEGG_PATHWAY    | vfm00620: Pyruvate metabolism                            | 6     | 7.5  | 1.31E-03 | 5099833, 5093157, 5100277, 5098542, 5093596, 5096140                                     | 40         | 36       | 1634      | 6.81            | 6.57E-02   | 9.66E-03  | 1.26E+00 |
| SP_PIR_KEYWORDS | Cysteine biosynthesis                                    | 3     | 3.75 | 1.82E-03 | 5096432, 5099138, 5096397                                                                | 80         | 6        | 7033      | 43.96           | 9.67E-02   | 2.51E-02  | 1.78E+00 |
| GOTERM_BP       | GO:0055114                                               | 14    | 17.5 | 2.07E-03 | 5099805,                                                                                 | 46         | 338      | 2757      | 2.48            | 2.67E-01   | 1.92E-02  | 2.45E+00 |

| Category        | Term                                                  | Count | %     | PValue   | Genes                                                                                                               | List Total | Pop Hits | Pop Total | Fold Enrichment | Bonferroni | Benjamini | FDR      |
|-----------------|-------------------------------------------------------|-------|-------|----------|---------------------------------------------------------------------------------------------------------------------|------------|----------|-----------|-----------------|------------|-----------|----------|
| _FAT            | 14~oxidation reduction                                |       |       |          | 5094200, 5100277, 5095180, 5094467, 5099138, 5097770, 5094788, 5098116, 5094445, 5094744, 5095530, 5096397, 5093448 |            |          |           |                 |            |           |          |
| KEGG_PATHWAY    | vfm00450 :Selenoamino acid metabolism                 | 4     | 5     | 2.38E-03 | 5096365, 5096432, 5099740, 5100074                                                                                  | 40         | 12       | 1634      | 13.62           | 1.17E-01   | 1.54E-02  | 2.29E+00 |
| GOTERM_BP_FAT   | GO:0009069~serine family amino acid metabolic process | 4     | 5     | 4.40E-03 | 5094445, 5096432, 5099138, 5096397                                                                                  | 46         | 21       | 2757      | 11.42           | 4.84E-01   | 3.82E-02  | 5.13E+00 |
| KEGG_PATHWAY    | vfm00010 :Glycolysis / Gluconeogenesis                | 5     | 6.25  | 4.86E-03 | 5093157, 5100277, 5098542, 5093596, 5096140                                                                         | 40         | 30       | 1634      | 6.81            | 2.24E-01   | 2.78E-02  | 4.62E+00 |
| KEGG_PATHWAY    | vfm00230 :Purine metabolism                           | 7     | 8.75  | 6.97E-03 | 5093686, 5096365, 5099740, 5098542, 5100074, 5095995, 5099174                                                       | 40         | 74       | 1634      | 3.86            | 3.05E-01   | 3.57E-02  | 6.57E+00 |
| GOTERM_BP_FAT   | GO:0044272~sulfur compound biosynthetic process       | 5     | 6.25  | 7.14E-03 | 5099805, 5094445, 5096432, 5099138, 5096397                                                                         | 46         | 48       | 2757      | 6.24            | 6.59E-01   | 5.80E-02  | 8.20E+00 |
| SP_PIR_KEYWORDS | heme                                                  | 3     | 3.75  | 8.97E-03 | 5094788, 5096397, 5093448                                                                                           | 80         | 13       | 7033      | 20.29           | 3.96E-01   | 9.60E-02  | 8.51E+00 |
| GOTERM_BP_FAT   | GO:0044271~nitrogen compound biosynthetic process     | 11    | 13.75 | 9.37E-03 | 5093686, 5099805, 5096830, 5098318, 5094445, 5097146, 5096432, 5095530, 5098218, 5099138, 5096397                   | 46         | 268      | 2757      | 2.46            | 7.56E-01   | 7.16E-02  | 1.06E+01 |
| SMART           | SM00116: CBS                                          | 3     | 3.75  | 1.03E-02 | 5099786, 5098938, 5096473                                                                                           | 7          | 31       | 1123      | 15.53           | 6.04E-02   | 6.04E-02  | 4.85E+00 |
| GOTERM_MF_FAT   | GO:0048037~cofactor binding                           | 9     | 11.25 | 1.55E-02 | 5094984, 5098116, 5094200,                                                                                          | 48         | 224      | 3173      | 2.66            | 8.96E-01   | 8.96E-01  | 1.69E+01 |

| Category         | Term                                                      | Count | %    | PValue   | Genes                                                                           | List Total | Pop Hits | Pop Total | Fold Enrichment | Bonferroni | Benjamini | FDR      |
|------------------|-----------------------------------------------------------|-------|------|----------|---------------------------------------------------------------------------------|------------|----------|-----------|-----------------|------------|-----------|----------|
|                  |                                                           |       |      |          | 5093157,<br>5096432,<br>5095530,<br>5099138,<br>5096397,<br>5096140             |            |          |           |                 |            |           |          |
| GOTERM_BP_FAT    | GO:0006091~generation of precursor metabolites and energy | 6     | 7.5  | 1.72E-02 | 5094788,<br>5094200,<br>5093157,<br>5099257,<br>5098542,<br>5099138             | 46         | 94       | 2757      | 3.83            | 9.26E-01   | 1.22E-01  | 1.87E+01 |
| SP_PIR_KEY_WORDS | Acyltransferase                                           | 5     | 6.25 | 1.96E-02 | 5096830,<br>5099833,<br>5093157,<br>5093155,<br>5097146                         | 80         | 92       | 7033      | 4.78            | 6.69E-01   | 1.68E-01  | 1.77E+01 |
| KEGG_PATHWAY     | vfm00250:Alanine, aspartate and glutamate metabolism      | 4     | 5    | 2.24E-02 | 5096830,<br>5098318,<br>5099257,<br>5093650                                     | 40         | 26       | 1634      | 6.28            | 6.92E-01   | 1.01E-01  | 1.97E+01 |
| KEGG_PATHWAY     | vfm00190:Oxidative phosphorylation                        | 4     | 5    | 2.48E-02 | 5094788,<br>5094200,<br>5097920,<br>5096543                                     | 40         | 27       | 1634      | 6.05            | 7.28E-01   | 1.03E-01  | 2.16E+01 |
| KEGG_PATHWAY     | vfm00632:Benzoate degradation via CoA ligation            | 3     | 3.75 | 2.67E-02 | 5094200,<br>5097920,<br>5096543                                                 | 40         | 11       | 1634      | 11.14           | 7.55E-01   | 1.02E-01  | 2.31E+01 |
| KEGG_PATHWAY     | vfi00250:Alanine, aspartate and glutamate metabolism      | 4     | 5    | 2.73E-02 | 5096830,<br>5098318,<br>5099257,<br>5093650                                     | 40         | 28       | 1634      | 5.84            | 7.63E-01   | 9.76E-02  | 2.36E+01 |
| GOTERM_MF_FAT    | GO:0050662~coenzyme binding                               | 7     | 8.75 | 2.89E-02 | 5098116,<br>5094200,<br>5093157,<br>5095530,<br>5099138,<br>5096397,<br>5096140 | 48         | 160      | 3173      | 2.89            | 9.86E-01   | 8.81E-01  | 2.94E+01 |
| SP_PIR_KEY_WORDS | nadp                                                      | 3     | 3.75 | 2.93E-02 | 5095530,<br>5099138,<br>5096397                                                 | 80         | 24       | 7033      | 10.99           | 8.11E-01   | 2.12E-01  | 2.55E+01 |
| GOTERM_MF_FAT    | GO:0016407~acetyltransferase activity                     | 5     | 6.25 | 2.94E-02 | 5096114,<br>5096830,<br>5099833,<br>5093157,<br>5097146                         | 48         | 80       | 3173      | 4.13            | 9.87E-01   | 7.64E-01  | 2.98E+01 |
| GOTERM_MF_FAT    | GO:0016667~oxidoreductase activity, acting on             | 4     | 5    | 3.13E-02 | 5094445,<br>5094467,<br>5099138,<br>5096397                                     | 48         | 47       | 3173      | 5.63            | 9.90E-01   | 6.85E-01  | 3.15E+01 |

| Category         | Term                                                 | Count | %     | PValue   | Genes                                                                                                                                 | List Total | Pop Hits | Pop Total | Fold Enrichment | Bonferroni | Benjamini | FDR      |
|------------------|------------------------------------------------------|-------|-------|----------|---------------------------------------------------------------------------------------------------------------------------------------|------------|----------|-----------|-----------------|------------|-----------|----------|
|                  | sulfur group of donors                               |       |       |          |                                                                                                                                       |            |          |           |                 |            |           |          |
| GOTERM_M F_FAT   | GO:0009055~electron carrier activity                 | 7     | 8.75  | 3.22E-02 | 5094788, 5094200, 5094467, 5094744, 5099138, 5096397, 5096140                                                                         | 48         | 164      | 3173      | 2.82            | 9.91E-01   | 6.12E-01  | 3.22E+01 |
| SP_PIR_KEY WORDS | pyruvate                                             | 3     | 3.75  | 3.40E-02 | 5093157, 5100277, 5098542                                                                                                             | 80         | 26       | 7033      | 10.14           | 8.56E-01   | 2.15E-01  | 2.89E+01 |
| GOTERM_M F_FAT   | GO:0016209~antioxidant activity                      | 3     | 3.75  | 3.44E-02 | 5094467, 5093448, 5097770                                                                                                             | 48         | 20       | 3173      | 9.92            | 9.94E-01   | 5.71E-01  | 3.40E+01 |
| GOTERM_BP_FAT    | GO:0009310~amine catabolic process                   | 3     | 3.75  | 3.74E-02 | 5095180, 5093155, 5097935                                                                                                             | 46         | 19       | 2757      | 9.46            | 9.97E-01   | 2.38E-01  | 3.65E+01 |
| GOTERM_BP_FAT    | GO:0009063~cellular amino acid catabolic process     | 3     | 3.75  | 3.74E-02 | 5095180, 5093155, 5097935                                                                                                             | 46         | 19       | 2757      | 9.46            | 9.97E-01   | 2.38E-01  | 3.65E+01 |
| INTERPRO         | IPR002500:Phosphoadenosine phosphosulphate reductase | 2     | 2.5   | 3.75E-02 | 5096365, 5094445                                                                                                                      | 71         | 3        | 5525      | 51.88           | 9.99E-01   | 9.99E-01  | 3.76E+01 |
| INTERPRO         | IPR000362:Fumarate lyase                             | 2     | 2.5   | 3.75E-02 | 5096830, 5099257                                                                                                                      | 71         | 3        | 5525      | 51.88           | 9.99E-01   | 9.99E-01  | 3.76E+01 |
| SP_PIR_KEY WORDS | transferase                                          | 15    | 18.75 | 4.32E-02 | 5096114, 5093157, 5093155, 5097146, 5096432, 5099740, 5097432, 5093686, 5096830, 5099833, 5094984, 5096365, 5098542, 5100074, 5098218 | 80         | 763      | 7033      | 1.73            | 9.16E-01   | 2.40E-01  | 3.53E+01 |
| GOTERM_M F_FAT   | GO:0004783~sulfite reductase (NADPH) activity        | 2     | 2.5   | 4.38E-02 | 5099138, 5096397                                                                                                                      | 48         | 3        | 3173      | 44.07           | 9.98E-01   | 6.05E-01  | 4.12E+01 |
| GOTERM_M F_FAT   | GO:0004779~sulfate adenylyltransferase activity      | 2     | 2.5   | 4.38E-02 | 5096365, 5100074                                                                                                                      | 48         | 3        | 3173      | 44.07           | 9.98E-01   | 6.05E-01  | 4.12E+01 |

| Category        | Term                                                      | Count | %    | PValue   | Genes                              | List Total | Pop Hits | Pop Total | Fold Enrichment | Bonferroni | Benjamini | FDR      |
|-----------------|-----------------------------------------------------------|-------|------|----------|------------------------------------|------------|----------|-----------|-----------------|------------|-----------|----------|
| GOTERM_MF_FAT   | GO:0004781~sulfate adenylyltransferase (ATP) activity     | 2     | 2.5  | 4.38E-02 | 5096365, 5100074                   | 48         | 3        | 3173      | 44.07           | 9.98E-01   | 6.05E-01  | 4.12E+01 |
| COG_ONTOLOGY    | Amino acid transport and metabolism / Coenzyme metabolism | 2     | 2.5  | 4.39E-02 | 5096365, 5094445                   | 15         | 4        | 1257      | 41.9            | 3.61E-01   | 3.61E-01  | 2.36E+01 |
| UP_SEQ_FEATURE  | domain:N-acetyltransferase                                | 2     | 2.5  | 4.39E-02 | 5096830, 5097146                   | 16         | 2        | 676       | 42.25           | 8.26E-01   | 8.26E-01  | 3.35E+01 |
| GOTERM_BP_FAT   | GO:0019419~sulfate reduction                              | 2     | 2.5  | 4.82E-02 | 5096365, 5094445                   | 46         | 3        | 2757      | 39.96           | 9.99E-01   | 2.86E-01  | 4.46E+01 |
| GOTERM_BP_FAT   | GO:0016054~organic acid catabolic process                 | 3     | 3.75 | 4.89E-02 | 5095180, 5093155, 5097935          | 46         | 22       | 2757      | 8.17            | 9.99E-01   | 2.79E-01  | 4.51E+01 |
| GOTERM_BP_FAT   | GO:0046395~carboxylic acid catabolic process              | 3     | 3.75 | 4.89E-02 | 5095180, 5093155, 5097935          | 46         | 22       | 2757      | 8.17            | 9.99E-01   | 2.79E-01  | 4.51E+01 |
| SP_PIR_KEYWORDS | arginine metabolism                                       | 2     | 2.5  | 5.49E-02 | 5095180, 5093155                   | 80         | 5        | 7033      | 35.17           | 9.58E-01   | 2.71E-01  | 4.28E+01 |
| INTERPRO        | IPR000644:Cystathionine beta-synthase, core               | 3     | 3.75 | 5.81E-02 | 5099786, 5098938, 5096473          | 71         | 31       | 5525      | 7.53            | 1.00E+00   | 9.95E-01  | 5.22E+01 |
| GOTERM_BP_FAT   | GO:0009066~aspartate family amino acid metabolic process  | 3     | 3.75 | 7.07E-02 | 5099805, 5099257, 5093650          | 46         | 27       | 2757      | 6.66            | 1.00E+00   | 3.67E-01  | 5.83E+01 |
| GOTERM_MF_FAT   | GO:0016410~N-acyltransferase activity                     | 4     | 5    | 7.55E-02 | 5096114, 5096830, 5093155, 5097146 | 48         | 67       | 3173      | 3.95            | 1.00E+00   | 7.59E-01  | 6.06E+01 |
| KEGG_PATHWAY    | vf00450: Selenoamino acid metabolism                      | 3     | 3.75 | 8.05E-02 | 5096432, 5099740, 5100074          | 40         | 20       | 1634      | 6.13            | 9.87E-01   | 2.52E-01  | 5.58E+01 |
| GOTERM_BP_FAT   | GO:0045333~cellular respiration                           | 3     | 3.75 | 8.49E-02 | 5094788, 5094200, 5099257          | 46         | 30       | 2757      | 5.99            | 1.00E+00   | 4.13E-01  | 6.54E+01 |

| Category      | Term                                  | Count | %   | PValue   | Genes            | List Total | Pop Hits | Pop Total | Fold Enrichment | Bonferroni | Benjamini | FDR      |
|---------------|---------------------------------------|-------|-----|----------|------------------|------------|----------|-----------|-----------------|------------|-----------|----------|
| INTERPRO      | IPR000089:Biotin/lysoyl attachment    | 2     | 2.5 | 8.54E-02 | 5093157, 5095222 | 71         | 7        | 5525      | 22.23           | 1.00E+00   | 9.95E-01  | 6.67E+01 |
| SMART         | SM00421: HTH_LU XR                    | 2     | 2.5 | 9.26E-02 | 5097659, 5097215 | 7          | 18       | 1123      | 17.83           | 4.42E-01   | 2.53E-01  | 3.72E+01 |
| GOTERM_BP_FAT | GO:0006527~arginine catabolic process | 2     | 2.5 | 9.41E-02 | 5095180, 5093155 | 46         | 6        | 2757      | 19.98           | 1.00E+00   | 4.35E-01  | 6.93E+01 |

**Table S2.** Enrichment analysis of the 94 differently expressed coding sequences for *V. fischeri* + nonfunctional artificial cells with respect to *V. fischeri* + *V. fischeri*.

|                   |                                                                                             |    |      |          |                                             |    |     |      |       |          |          |          |
|-------------------|---------------------------------------------------------------------------------------------|----|------|----------|---------------------------------------------|----|-----|------|-------|----------|----------|----------|
| GOTERM_<br>BP_FAT | GO:0006189<br>~'de novo'<br>IMP<br>biosynthetic<br>process                                  | 4  | 4.26 | 8.40E-05 | 5097940,<br>5095472,<br>5093469,<br>5098195 | 47 | 6   | 2757 | 39.11 | 1.62E-02 | 1.62E-02 | 1.05E-01 |
| GOTERM_<br>BP_FAT | GO:0006188<br>~IMP<br>biosynthetic<br>process                                               | 4  | 4.26 | 2.30E-04 | 5097940,<br>5095472,<br>5093469,<br>5098195 | 47 | 8   | 2757 | 29.33 | 4.36E-02 | 2.20E-02 | 2.86E-01 |
| GOTERM_<br>BP_FAT | GO:0046040<br>~IMP<br>metabolic<br>process                                                  | 4  | 4.26 | 2.30E-04 | 5097940,<br>5095472,<br>5093469,<br>5098195 | 47 | 8   | 2757 | 29.33 | 4.36E-02 | 2.20E-02 | 2.86E-01 |
| GOTERM_<br>BP_FAT | GO:0009168<br>~purine<br>ribonucleosi<br>de<br>monophosph<br>ate<br>biosynthetic<br>process | 4  | 4.26 | 6.53E-04 | 5097940,<br>5095472,<br>5093469,<br>5098195 | 47 | 11  | 2757 | 21.33 | 1.19E-01 | 4.14E-02 | 8.12E-01 |
| GOTERM_<br>BP_FAT | GO:0009126<br>~purine<br>nucleoside<br>monophosph<br>ate<br>metabolic<br>process            | 4  | 4.26 | 6.53E-04 | 5097940,<br>5095472,<br>5093469,<br>5098195 | 47 | 11  | 2757 | 21.33 | 1.19E-01 | 4.14E-02 | 8.12E-01 |
| GOTERM_<br>BP_FAT | GO:0009127<br>~purine<br>nucleoside<br>monophosph<br>ate<br>biosynthetic<br>process         | 4  | 4.26 | 6.53E-04 | 5097940,<br>5095472,<br>5093469,<br>5098195 | 47 | 11  | 2757 | 21.33 | 1.19E-01 | 4.14E-02 | 8.12E-01 |
| GOTERM_<br>BP_FAT | GO:0009167<br>~purine<br>ribonucleosi<br>de<br>monophosph<br>ate<br>metabolic<br>process    | 4  | 4.26 | 6.53E-04 | 5097940,<br>5095472,<br>5093469,<br>5098195 | 47 | 11  | 2757 | 21.33 | 1.19E-01 | 4.14E-02 | 8.12E-01 |
| GOTERM_<br>BP_FAT | GO:0009161<br>~ribonucleos<br>ide<br>monophosph<br>ate<br>metabolic<br>process              | 4  | 4.26 | 1.39E-03 | 5097940,<br>5095472,<br>5093469,<br>5098195 | 47 | 14  | 2757 | 16.76 | 2.37E-01 | 6.53E-02 | 1.72E+00 |
| GOTERM_<br>BP_FAT | GO:0009156<br>~ribonucleos<br>ide<br>monophosph<br>ate<br>biosynthetic<br>process           | 4  | 4.26 | 1.39E-03 | 5097940,<br>5095472,<br>5093469,<br>5098195 | 47 | 14  | 2757 | 16.76 | 2.37E-01 | 6.53E-02 | 1.72E+00 |
| GOTERM_<br>BP_FAT | GO:0044271<br>~nitrogen<br>compound                                                         | 12 | 12.7 | 3.59E-03 | 5097940,<br>5096595,<br>5099333,            | 47 | 268 | 2757 | 2.63  | 5.03E-01 | 1.30E-01 | 4.39E+00 |



|                 |                                                                                      |    |       |          |                                                                                 |    |     |      |       |          |          |          |
|-----------------|--------------------------------------------------------------------------------------|----|-------|----------|---------------------------------------------------------------------------------|----|-----|------|-------|----------|----------|----------|
|                 | biosynthetic process                                                                 |    |       |          | 5099487, 5097435, 5097146, 5099025, 5095472, 5093469, 5100143, 5098195, 5096166 |    |     |      |       |          |          |          |
| KEGG_PATHWAY    | vfm00230:P urine metabolism                                                          | 7  | 7.45  | 4.01E-03 | 5097940, 5099350, 5094638, 5096722, 5095472, 5093469, 5098195                   | 36 | 74  | 1634 | 4.29  | 2.01E-01 | 2.01E-01 | 3.89E+00 |
| GOTERM_BP_FAT   | GO:0009124 ~nucleoside monophosphate biosynthetic process                            | 4  | 4.26  | 4.06E-03 | 5097940, 5095472, 5093469, 5098195                                              | 47 | 20  | 2757 | 11.73 | 5.46E-01 | 1.23E-01 | 4.95E+00 |
| GOTERM_BP_FAT   | GO:0009123 ~nucleoside monophosphate metabolic process                               | 4  | 4.26  | 5.36E-03 | 5097940, 5095472, 5093469, 5098195                                              | 47 | 22  | 2757 | 10.67 | 6.48E-01 | 1.38E-01 | 6.49E+00 |
| GOTERM_BP_FAT   | GO:0034404 ~nucleobase, nucleoside and nucleotide biosynthetic process               | 6  | 6.38  | 7.48E-03 | 5097940, 5096595, 5095472, 5093469, 5100143, 5098195                            | 47 | 75  | 2757 | 4.69  | 7.67E-01 | 1.66E-01 | 8.94E+00 |
| GOTERM_BP_FAT   | GO:0034654 ~nucleobase, nucleoside, nucleotide and nucleic acid biosynthetic process | 6  | 6.38  | 7.48E-03 | 5097940, 5096595, 5095472, 5093469, 5100143, 5098195                            | 47 | 75  | 2757 | 4.69  | 7.67E-01 | 1.66E-01 | 8.94E+00 |
| GOTERM_BP_FAT   | GO:0009152 ~purine ribonucleotide biosynthetic process                               | 4  | 4.26  | 1.17E-02 | 5097940, 5095472, 5093469, 5098195                                              | 47 | 29  | 2757 | 8.09  | 8.99E-01 | 2.25E-01 | 1.37E+01 |
| GOTERM_BP_FAT   | GO:0009150 ~purine ribonucleotide metabolic process                                  | 4  | 4.26  | 1.41E-02 | 5097940, 5095472, 5093469, 5098195                                              | 47 | 31  | 2757 | 7.57  | 9.36E-01 | 2.41E-01 | 1.62E+01 |
| GOTERM_BP_FAT   | GO:0009260 ~ribonucleotide biosynthetic process                                      | 4  | 4.26  | 1.54E-02 | 5097940, 5095472, 5093469, 5098195                                              | 47 | 32  | 2757 | 7.33  | 9.51E-01 | 2.39E-01 | 1.76E+01 |
| SP_PIR_KEYWORDS | cytoplasm                                                                            | 10 | 10.64 | 1.59E-02 | 5099350, 5094741, 5099487, 5093882, 5096673,                                    | 94 | 296 | 7033 | 2.53  | 6.24E-01 | 6.24E-01 | 1.49E+01 |

|                     |                                                                                |   |      |          |                                                                     |    |    |      |       |          |          |          |                                                         |
|---------------------|--------------------------------------------------------------------------------|---|------|----------|---------------------------------------------------------------------|----|----|------|-------|----------|----------|----------|---------------------------------------------------------|
|                     |                                                                                |   |      |          |                                                                     |    |    |      |       |          |          |          | 5097146,<br>5094544,<br>5097559,<br>5100143,<br>5098195 |
| SP_PIR_KE<br>YWORDS | purine<br>biosynthesis                                                         | 3 | 3.19 | 1.62E-02 | 5097940,<br>5095472,<br>5098195                                     | 94 | 15 | 7033 | 14.96 | 6.32E-01 | 3.93E-01 | 1.52E+01 |                                                         |
| GOTERM_<br>BP_FAT   | GO:0009259<br>~ribonucleot<br>ide<br>metabolic<br>process                      | 4 | 4.26 | 1.81E-02 | 5097940,<br>5095472,<br>5093469,<br>5098195                         | 47 | 34 | 2757 | 6.9   | 9.71E-01 | 2.56E-01 | 2.04E+01 |                                                         |
| GOTERM_<br>BP_FAT   | GO:0009165<br>~nucleotide<br>biosynthetic<br>process                           | 5 | 5.32 | 1.97E-02 | 5097940,<br>5096595,<br>5095472,<br>5093469,<br>5098195             | 47 | 63 | 2757 | 4.66  | 9.79E-01 | 2.57E-01 | 2.20E+01 |                                                         |
| KEGG_PA<br>THWAY    | vfi00230:Pu<br>rine<br>metabolism                                              | 6 | 6.38 | 2.66E-02 | 5097940,<br>5099350,<br>5094638,<br>5095472,<br>5093469,<br>5098195 | 36 | 81 | 1634 | 3.36  | 7.79E-01 | 5.30E-01 | 2.34E+01 |                                                         |
| GOTERM_<br>BP_FAT   | GO:0006399<br>~tRNA<br>metabolic<br>process                                    | 5 | 5.32 | 2.92E-02 | 5093607,<br>5094741,<br>5097710,<br>5096673,<br>5100143             | 47 | 71 | 2757 | 4.13  | 9.97E-01 | 3.37E-01 | 3.09E+01 |                                                         |
| INTERPRO            | IPR014729:<br>Rossmann-<br>like<br>alpha/beta/al<br>pha<br>sandwich<br>fold    | 4 | 4.26 | 3.03E-02 | 5093607,<br>5096827,<br>5098671,<br>5095818                         | 83 | 46 | 5525 | 5.79  | 9.98E-01 | 9.98E-01 | 3.20E+01 |                                                         |
| GOTERM_<br>BP_FAT   | GO:0009264<br>~deoxyribon<br>ucleotide<br>catabolic<br>process                 | 2 | 2.13 | 3.31E-02 | 5099350,<br>5097559                                                 | 47 | 2  | 2757 | 58.66 | 9.99E-01 | 3.53E-01 | 3.43E+01 |                                                         |
| GOTERM_<br>BP_FAT   | GO:0006164<br>~purine<br>nucleotide<br>biosynthetic<br>process                 | 4 | 4.26 | 3.57E-02 | 5097940,<br>5095472,<br>5093469,<br>5098195                         | 47 | 44 | 2757 | 5.33  | 9.99E-01 | 3.57E-01 | 3.65E+01 |                                                         |
| GOTERM_<br>MF_FAT   | GO:0004638<br>~phosphorib<br>osylaminoim<br>idazole<br>carboxylase<br>activity | 2 | 2.13 | 4.93E-02 | 5097940,<br>5095472                                                 | 54 | 3  | 3173 | 39.17 | 9.99E-01 | 9.99E-01 | 4.52E+01 |                                                         |
| GOTERM_<br>BP_FAT   | GO:0006163<br>~purine<br>nucleotide<br>metabolic<br>process                    | 4 | 4.26 | 4.94E-02 | 5097940,<br>5095472,<br>5093469,<br>5098195                         | 47 | 50 | 2757 | 4.69  | 1.00E+00 | 4.39E-01 | 4.68E+01 |                                                         |
| SP_PIR_KE<br>YWORDS | amino-acid<br>biosynthesis                                                     | 4 | 4.26 | 6.06E-02 | 5099333,<br>5099487,<br>5097146,<br>5096166                         | 94 | 68 | 7033 | 4.4   | 9.78E-01 | 7.20E-01 | 4.67E+01 |                                                         |
| GOTERM_<br>BP_FAT   | GO:0034660                                                                     | 5 | 5.32 | 7.62E-02 | 5093607,<br>5095472,<br>5098195                                     | 47 | 97 | 2757 | 3.02  | 1.00E+00 | 5.75E-01 | 6.28E+01 |                                                         |

|                   |                                                                                            |   |      |          |                                             |    |   |      |       |          |          |          |
|-------------------|--------------------------------------------------------------------------------------------|---|------|----------|---------------------------------------------|----|---|------|-------|----------|----------|----------|
| BP_FAT            | ~ncRNA<br>metabolic<br>process                                                             |   |      |          | 5094741,<br>5097710,<br>5096673,<br>5100143 |    |   |      |       |          |          |          |
| GOTERM_<br>BP_FAT | GO:0016042<br>~lipid<br>catabolic<br>process                                               | 2 | 2.13 | 8.07E-02 | 5097258,<br>5093882                         | 47 | 5 | 2757 | 23.46 | 1.00E+00 | 5.77E-01 | 6.50E+01 |
| GOTERM_<br>BP_FAT | GO:0009262<br>~deoxyribon<br>ucleotide<br>metabolic<br>process                             | 2 | 2.13 | 8.07E-02 | 5099350,<br>5097559                         | 47 | 5 | 2757 | 23.46 | 1.00E+00 | 5.77E-01 | 6.50E+01 |
| INTERPRO          | IPR001150:<br>Formate C-<br>acetyltransfe<br>rase glycine<br>radical                       | 2 | 2.13 | 9.94E-02 | 5098574,<br>5098553                         | 83 | 7 | 5525 | 19.02 | 1.00E+00 | 1.00E+00 | 7.31E+01 |
| INTERPRO          | IPR003088:<br>Cytochrome<br>c, class I                                                     | 2 | 2.13 | 9.94E-02 | 5099252,<br>5100068                         | 83 | 7 | 5525 | 19.02 | 1.00E+00 | 1.00E+00 | 7.31E+01 |
| INTERPRO          | IPR019777:<br>Formate C-<br>acetyltransfe<br>rase glycine<br>radical,<br>conserved<br>site | 2 | 2.13 | 9.94E-02 | 5098574,<br>5098553                         | 83 | 7 | 5525 | 19.02 | 1.00E+00 | 1.00E+00 | 7.31E+01 |

**Table S3.** Enrichment analysis of the 26 differently expressed coding sequences for *V. fischeri* + functional artificial cells with respect to *V. fischeri* + *V. fischeri*. Highlighted in grey are the significantly enriched five gene sets with  $FDR < 10^{-2}$ .

|                 |                               |    |       |           |                                                                                                            |    |     |      |       |          |          |          |
|-----------------|-------------------------------|----|-------|-----------|------------------------------------------------------------------------------------------------------------|----|-----|------|-------|----------|----------|----------|
| GOTERM_MF_FAT   | GO:0016151~nickel ion binding | 5  | 19.23 | 8.9E-08   | 5100389, 5097037, 5098484, 5100141, 5097212                                                                | 17 | 10  | 3173 | 93.32 | 4.63E-06 | 4.63E-06 | 8.65E-05 |
| SP_PIR_KEYWORDS | Chaperone                     | 6  | 23.08 | 9.64E-08  | 5100389, 5099958, 5097037, 5098484, 5094048, 5100141                                                       | 26 | 34  | 7033 | 47.74 | 3.28E-06 | 3.28E-06 | 8.48E-05 |
| GOTERM_MF_FAT   | GO:0043167~ion binding        | 12 | 46.15 | 1.142E-06 | 5098855, 5096094, 5100389, 5097037, 5098484, 5098990, 5095327, 5099644, 5099334, 5099244, 5100141, 5097212 | 17 | 459 | 3173 | 4.88  | 5.94E-05 | 2.97E-05 | 1.11E-03 |
| GOTERM_MF_FAT   | GO:0043169~cation binding     | 12 | 46.15 | 1.142E-06 | 5098855, 5096094, 5100389, 5097037, 5098484, 5098990, 5095327, 5099644, 5099334, 5099244, 5100141, 5097212 | 17 | 459 | 3173 | 4.88  | 5.94E-05 | 2.97E-05 | 1.11E-03 |
| SP_PIR_KEYWORDS | cytoplasm                     | 9  | 34.62 | 5.18E-06  | 5100389, 5099958, 5097037, 5098484, 5098990, 5099244, 5094048, 5100141, 5097212                            | 26 | 296 | 7033 | 8.22  | 1.76E-04 | 8.80E-05 | 4.55E-03 |
| GOTERM_MF_FAT   | GO:0046872~metal ion binding  | 11 | 42.31 | 7.071E-06 | 5096094, 5100389, 5097037, 5098484, 5098990, 5095327, 5099644, 5099334, 5099244, 5100141, 5097212          | 17 | 430 | 3173 | 4.77  | 3.68E-04 | 1.23E-04 | 6.87E-03 |

|                 |                                                                                      |   |       |           |                                                                                 |    |     |      |        |          |          |          |
|-----------------|--------------------------------------------------------------------------------------|---|-------|-----------|---------------------------------------------------------------------------------|----|-----|------|--------|----------|----------|----------|
| GOTERM_MF_FAT   | GO:0046914~transition metal binding                                                  | 9 | 34.62 | 4.412E-05 | 5100389, 5097037, 5098484, 5098990, 5095327, 5099644, 5099334, 5100141, 5097212 | 17 | 306 | 3173 | 5.49   | 2.29E-03 | 5.73E-04 | 4.29E-02 |
| SP_PIR_KEYWORDS | Nickel insertion                                                                     | 3 | 11.54 | 1.21E-04  | 5100389, 5097037, 5100141                                                       | 26 | 5   | 7033 | 162.3  | 4.09E-03 | 1.37E-03 | 1.06E-01 |
| SP_PIR_KEYWORDS | zinc                                                                                 | 4 | 15.38 | 3.13E-03  | 5098990, 5095327, 5099644, 5099334                                              | 26 | 84  | 7033 | 12.88  | 1.01E-01 | 2.63E-02 | 2.72E+00 |
| KEGG_PATHWAY    | vfm006413-Chloroacrylic acid degradation                                             | 2 | 7.69  | 1.46E-02  | 5095327, 5099334                                                                | 9  | 3   | 1634 | 121.04 | 2.66E-01 | 2.66E-01 | 1.08E+01 |
| KEGG_PATHWAY    | vfm006241- and 2-Methylnaphthalene degradation                                       | 2 | 7.69  | 1.46E-02  | 5095327, 5099334                                                                | 9  | 3   | 1634 | 121.04 | 2.66E-01 | 2.66E-01 | 1.08E+01 |
| GOTERM_BP_FAT   | GO:0006457~protein folding                                                           | 3 | 11.54 | 1.55E-02  | 5099958, 5098484, 5098672                                                       | 13 | 45  | 2757 | 14.14  | 6.95E-01 | 6.95E-01 | 1.52E+01 |
| GOTERM_BP_FAT   | GO:0034308~monohydric alcohol metabolic process                                      | 2 | 7.69  | 1.73E-02  | 5095327, 5099334                                                                | 13 | 4   | 2757 | 106.04 | 7.35E-01 | 4.85E-01 | 1.68E+01 |
| GOTERM_BP_FAT   | GO:0019627~urea metabolic process                                                    | 2 | 7.69  | 1.73E-02  | 5098484, 5097212                                                                | 13 | 4   | 2757 | 106.04 | 7.35E-01 | 4.85E-01 | 1.68E+01 |
| GOTERM_BP_FAT   | GO:0006069~ethanol oxidation                                                         | 2 | 7.69  | 1.73E-02  | 5095327, 5099334                                                                | 13 | 4   | 2757 | 106.04 | 7.35E-01 | 4.85E-01 | 1.68E+01 |
| GOTERM_BP_FAT   | GO:0006067~ethanol metabolic process                                                 | 2 | 7.69  | 1.73E-02  | 5095327, 5099334                                                                | 13 | 4   | 2757 | 106.04 | 7.35E-01 | 4.85E-01 | 1.68E+01 |
| INTERPRO        | IPR014183:Alcohol dehydrogenase class III/S-(hydroxymethyl)glutathione dehydrogenase | 2 | 7.69  | 1.80E-02  | 5095327, 5099334                                                                | 26 | 4   | 5525 | 106.25 | 7.19E-01 | 7.19E-01 | 1.71E+01 |
| KEGG_PATHWAY    | vfm00980:Metabolism of xenobiotic                                                    | 2 | 7.69  | 1.95E-02  | 5095327, 5099334                                                                | 9  | 4   | 1634 | 90.78  | 3.38E-01 | 1.86E-01 | 1.41E+01 |

|                 |                                                                  |   |       |          |                                    |    |     |      |       |          |          |          |                             |
|-----------------|------------------------------------------------------------------|---|-------|----------|------------------------------------|----|-----|------|-------|----------|----------|----------|-----------------------------|
|                 |                                                                  |   |       |          |                                    |    |     |      |       |          |          |          | s by<br>cytochrom<br>e P450 |
| GOTERM_ MF_FAT  | GO:0051903~S-(hydroxymethyl)glutathione dehydrogenase activity   | 2 | 7.69  | 2.00E-02 | 5095327, 5099334                   | 17 | 4   | 3173 | 93.32 | 6.51E-01 | 1.90E-01 | 1.78E+01 |                             |
| GOTERM_ MF_FAT  | GO:0008270~zinc ion binding                                      | 4 | 15.38 | 2.54E-02 | 5098990, 5095327, 5099644, 5099334 | 17 | 130 | 3173 | 5.74  | 7.38E-01 | 2.00E-01 | 2.22E+01 |                             |
| GOTERM_ MF_FAT  | GO:0004022~alcohol dehydrogenase (NAD) activity                  | 2 | 7.69  | 2.99E-02 | 5095327, 5099334                   | 17 | 6   | 3173 | 62.22 | 7.94E-01 | 2.02E-01 | 2.55E+01 |                             |
| INTERPRO        | IPR002328:Alcohol dehydrogenase, zinc-containing, conserved site | 2 | 7.69  | 3.13E-02 | 5095327, 5099334                   | 26 | 7   | 5525 | 60.71 | 8.92E-01 | 6.71E-01 | 2.80E+01 |                             |
| KEGG_PATHWAY    | vfm00350:Tyrosine metabolism                                     | 2 | 7.69  | 3.38E-02 | 5095327, 5099334                   | 9  | 7   | 1634 | 51.87 | 5.15E-01 | 2.14E-01 | 2.33E+01 |                             |
| SP_PIR_KEYWORDS | metal-binding                                                    | 4 | 15.38 | 4.09E-02 | 5098990, 5095327, 5099644, 5099334 | 26 | 218 | 7033 | 4.96  | 7.58E-01 | 2.47E-01 | 3.07E+01 |                             |
| KEGG_PATHWAY    | vfm00680:Methane metabolism                                      | 2 | 7.69  | 4.80E-02 | 5095327, 5099334                   | 9  | 10  | 1634 | 36.31 | 6.44E-01 | 2.28E-01 | 3.16E+01 |                             |
| KEGG_PATHWAY    | vfm00071:Fatty acid metabolism                                   | 2 | 7.69  | 5.27E-02 | 5095327, 5099334                   | 9  | 11  | 1634 | 33.01 | 6.79E-01 | 2.03E-01 | 3.42E+01 |                             |
| INTERPRO        | IPR013149:Alcohol dehydrogenase, zinc-binding                    | 2 | 7.69  | 5.30E-02 | 5095327, 5099334                   | 26 | 12  | 5525 | 35.42 | 9.78E-01 | 7.19E-01 | 4.31E+01 |                             |
| INTERPRO        | IPR002085:Alcohol dehydrogenase superfamily, zinc-containing     | 2 | 7.69  | 5.30E-02 | 5095327, 5099334                   | 26 | 12  | 5525 | 35.42 | 9.78E-01 | 7.19E-01 | 4.31E+01 |                             |
| INTERPRO        | IPR013154:Alcohol dehydrogenase GroES-                           | 2 | 7.69  | 5.30E-02 | 5095327, 5099334                   | 26 | 12  | 5525 | 35.42 | 9.78E-01 | 7.19E-01 | 4.31E+01 |                             |

|                 | like                                                     |   |       |          |                                             |    |     |      |       |          |          |          |
|-----------------|----------------------------------------------------------|---|-------|----------|---------------------------------------------|----|-----|------|-------|----------|----------|----------|
| GOTERM_MF_FAT   | GO:0051082~unfolded protein binding                      | 2 | 7.69  | 6.85E-02 | 5099958, 5098484                            | 17 | 14  | 3173 | 26.66 | 9.75E-01 | 3.69E-01 | 4.98E+01 |
| SP_PIR_KEYWORDS | nucleotide-binding                                       | 5 | 19.23 | 6.96E-02 | 5096094, 5099958, 5097037, 5099244, 5094048 | 26 | 445 | 7033 | 3.04  | 9.14E-01 | 3.36E-01 | 4.70E+01 |
| GOTERM_BP_FAT   | GO:0006547~histidine metabolic process                   | 2 | 7.69  | 8.38E-02 | 5098990, 5094537                            | 13 | 20  | 2757 | 21.21 | 9.99E-01 | 8.91E-01 | 6.02E+01 |
| GOTERM_BP_FAT   | GO:0009075~histidine family amino acid metabolic process | 2 | 7.69  | 8.38E-02 | 5098990, 5094537                            | 13 | 20  | 2757 | 21.21 | 9.99E-01 | 8.91E-01 | 6.02E+01 |

**Table S4.** Bacterial strains used in this study.

| Strain                                                | Plasmid | Use                                                                                                                       |
|-------------------------------------------------------|---------|---------------------------------------------------------------------------------------------------------------------------|
| 3OC12 HSL <i>E. coli</i> TOP10 reporter               | K575024 | <i>E. coli</i> strain used to sense 3OC12 HSL                                                                             |
| 3OC12 HSL <i>E. coli</i> NEBexpress reporter          | K575024 | <i>E. coli</i> strain used to sense 3OC12 HSL                                                                             |
| 3OC6 HSL <i>E. coli</i> TOP10 reporter                | T9002   | <i>E. coli</i> strain used to sense 3OC6 HSL and leakage experiments                                                      |
| C4 HSL <i>E. coli</i> TOP10 reporter                  | K575037 | <i>E. coli</i> strain used to sense C4SL                                                                                  |
| <i>V. fischeri</i> MJ11 (ATCC BAA-1741)               |         | Strain used to perform the cellular Turing test, quorum quenching experiments, to sense 3OC6 HSL, and leakage experiments |
| <i>V. fischeri</i> 7744 (ATCC 7744)                   |         | Strain used to activate artificial cells able to produce 3OC12 HSL                                                        |
| <i>V. harveyi</i> BB170 (ATCC BAA-1117)               |         | Strain used to sense AI-2 and leakage experiments                                                                         |
| <i>P. aeruginosa</i> PT5 PAO1 wild-type <sup>14</sup> |         | Strain used for quorum quenching experiments and leakage experiments                                                      |

**Table S5.** DNA sequences used in this study.

| NAME    | NOTE                                                                                  | SEQUENCE*                                                                                                                                                                                                                                                                                                                                                                                                                                                                                                                                                                                                                                                                                                                                                                                                                                                                                                                                                                                                                                                                                                                                                                                                                                                                                                                                                                                                                                                                                                                                                                                                              |
|---------|---------------------------------------------------------------------------------------|------------------------------------------------------------------------------------------------------------------------------------------------------------------------------------------------------------------------------------------------------------------------------------------------------------------------------------------------------------------------------------------------------------------------------------------------------------------------------------------------------------------------------------------------------------------------------------------------------------------------------------------------------------------------------------------------------------------------------------------------------------------------------------------------------------------------------------------------------------------------------------------------------------------------------------------------------------------------------------------------------------------------------------------------------------------------------------------------------------------------------------------------------------------------------------------------------------------------------------------------------------------------------------------------------------------------------------------------------------------------------------------------------------------------------------------------------------------------------------------------------------------------------------------------------------------------------------------------------------------------|
| JF005A  | pT7-<br>RBS-<br>HLPT-<br>T7 term                                                      | TAATACGACTCACTATAGGGGAATTGTGAGCGGATAACAATTCCCCTCTAGAAAAATTTTGTTTAACTTTAAGA<br>AGGAGATATACATATGATGCGGTGTTAGATAGCTTCACAGTCGATCATACCCGGATGGAAGCGCTGCAGTTTCG<br>GGTGGCGAAAACAATGAACACCCCGCATGGCGACGCAATCACCGTGTTCGATCTGCGCTTCTGCGTGCCGAACAA<br>AGAAGTGATGCCAGAAAGAGGGATCCATACCCTGGAGCACCTGTTTGTGGTTTTATGCGTAACCATCTTAACGG<br>TAATGGTGTAGAGATTATCGATATCTCGCCAATGGGCTGCCGACCGGTTTTTATATGAGTCTGATTGGTACGCC<br>AGATGAGCAGCGTGTGCTGATGCCGAAAGCGGCAATGGAAGACGTGCTGAAAGTGCAGGATCAGAATCAGAT<br>CCCGGAACCTGAACGTCTACCAGTGTGGCACTTACCAGATGCACTCGTTCAGGAAGCGCAGGATATTGCGCGTAG<br>CATTCTGGAACGTGACGTACGCATCAACAGCAACGAAGAAGTGGCACTGCCGAAAGAGAAGTTGCAGGAACCTGCA<br>CATCggccgaaagatccgacctcgagatATGAAAAATCGGCATCATTGGTGCAATGGAAGAAGTACCGCTGCT<br>GCGTGACAAAATCGAAAACCGTCAAACTATCAGTCTCGGCGGTTGCGAAATCTATACCGGCAACTGAATGGAAC<br>CGAGGTGCGCTTCTGAAATCGGGCATCGGTAAAGTCGCTGCGGCGCTGGGTGCCACTTTGCTGTGGAACACTG<br>CAAGCCAGATGTGATTATTAACACCGGTTCTGCGGTTGGCCTGGCACCAACGTTGAAAGTGGGCGATATCGTTGT<br>CTCGGACGAAGCACGTTATCACGACGCGGATGTCACGGCATTTGGTTATGAATACGGTCACTTACCAGGCTGCC<br>GGCAGGCTTTAAAGCTGACGATAAACTGATCGCTGCGGCTGAGGCTGCATTGCCGAACCTGAATCTTAACGCTGT<br>ACGTGGCCTGATTGTTAGCGGCGACGCTTTTCATCAACGGTTCGTGTTGGTCTGGCGAAAATCCGCCACAACCTCCC<br>ACAGGCCATTTGCTGTAGAGATGGAAGCGACGGCAATCGCCCATGTCTGCCACAATTTCAACGTCCCGTTTGTGT<br>CGTACGCGCCATCTCCGACGTGGCCGATCAACAGTCTCATCTAGCTTCGATGAGTCCCTGGCTGTGCGGCTAA<br>ACAGTCCAGCCTGATGGTTGAGTCACTGGTGCAGAAACTTGACATGGCTAAAGAATTCGAGCTCCGTCGACAAGC<br>TTGCGGCCGCACTCGAGCACCACCACCACCACCTGAGATCCGGCTGCTAACAAAGCCGAAAGGAAGCTGAGT<br>TGGCTGCTGCCACCGCTGAGCAATAACTAGCATAACCCCTTGGGGCTCTAAACGGGCTTGAGGGGTTTTTTG |
| K575024 | pLasB-<br>BBa_<br>B0030-<br>GFPmut<br>3b-<br>BBa_<br>J2311-<br>BBa_<br>B0034-<br>lasR | GCCCCTCGCTGAGCGCGTCCCGGAGCTGGGGCAACCTAGCTGCCACCTGCTTTTCTGCTAGCTATTCCAGCGAA<br>AACATACAGATTTCCGGCGAAATCAAGGCTACCTGCCAGTTCTGGCAGGTTTGGCCGCGGGTCTTTTTTGGTACA<br>CGAAAGCTACTAGAGATTAAAGAGGAGAAATACTAGATGCGGTAAGGAGAAGAATTTTCACTGGAGTTGTCCTCA<br>ATTCTTGTGTAATTAGATGGTGTGTTAATGGGCACAAATTTTCTGTCAGTGGAGAGGGTGAAGGTGATGCAACA<br>TACGGAAAACCTACCCTTAAATTTATTTGCACTATGGAAAACCTACCTGTTCCATGGCCAACTGTGCACTACT<br>TTCCGTTATGGTGTTCATGCTTTTGGAGATACCCAGATCATATGAAACAGCATGCTTTTCAAGAGTGCCTATG<br>CCCGAAGGTTATGTACAGGAAAGAACTATATTTTTCAAAGATGACGGGAACACAAAGACAGTGTGAAGTCAAG<br>TTTGAAGGTGATACCCTTGTTAATAGAATCGAGTTAAAAGGTATTGATTTTAAAGAGATGGAACATTTCTTGA<br>CACAAATTGAATACAACATAACTCACACAATGTATACATCATGGCAGACAAAAGAAATGGAATCAAAGTT<br>AACTTCAAAATTAGACACAACATTTGAAGATGGAAGCGTTCAACTAGCAGACCATTATCAACAAAATACTCCAATT<br>GGCGATGGCCCTGTCTTTTACCAGACAACCACTTACCTGTCCACACAATCTGCCCTTTCGAAAGATCCCAACGAA<br>AAGAGAGACCACATGCTCTCTTGTAGTTTGTAAAGCTGCTGGGATTACACATGGCATGGATGAACTATACAAA<br>TAAATAACTAGAGTTGACAGCTAGCTCAGTCTAGGTATAATGCTAGCTACTAGAGATTAAAGAGGAGAAATAC                                                                                                                                                                                                                                                                                                                                                                                                                                                                                                                                                                          |



|         |                                                                                            |                                                                                                                                                                                                                                                                                                                                                                                                                                                                                                                                                                                                                                                                                                                                                                                                                                                                                                                                                                                                                                                                                                                                                                                                                                                                                                                                                                                                                                                                                                                                                                                                                                                           |
|---------|--------------------------------------------------------------------------------------------|-----------------------------------------------------------------------------------------------------------------------------------------------------------------------------------------------------------------------------------------------------------------------------------------------------------------------------------------------------------------------------------------------------------------------------------------------------------------------------------------------------------------------------------------------------------------------------------------------------------------------------------------------------------------------------------------------------------------------------------------------------------------------------------------------------------------------------------------------------------------------------------------------------------------------------------------------------------------------------------------------------------------------------------------------------------------------------------------------------------------------------------------------------------------------------------------------------------------------------------------------------------------------------------------------------------------------------------------------------------------------------------------------------------------------------------------------------------------------------------------------------------------------------------------------------------------------------------------------------------------------------------------------------------|
|         |                                                                                            | TAGATGGCCTTGGTTGACGGTTTTCTTGAGCTGGAACGCTCAAGTGGAAAATTGGAGTGGAGCGCCATCCTCCAG AAGATGGCGAGCGACCTGGATTCTCGAAGATCCTGTTCCGCTGTTGCCTAAGGACAGCCAGGACTACGAGAAC GCCTTCATCGTCGGCAACTACCCGGCCGCTGGCCGGAGCATTACGACCGGCTGCCTACCGCGTCCGACCCG ACGGTCAGTCACTGTACCCAGACGCTACTGCCGATTTTCTGGAAACCGTCCATCTACCAGACCGAAAGCAGCAC GAGTTCTCGAGGAAGCCTCGGCCCGCGCTGGTGTATGGGCTGACCATGCCGTCGATGGTGTGCGCGCGAA CTCGGCGCGCTGAGCCTCAGCGTGGAAAGCGGAAAACCGGGCCGAGGCCAACCGTTTCATAGAGTCCGGTCTGCCG ACCCTGTGGATGCTCAAGGACTACGCACTGCAAGCGGTGCCGACTGCCCTCGAACATCCGGTCAGCAACCCG GTGGTTCTGACAGCCGGGAGAAGGAGTGTTCAGTGGTGGCGCCATCGGCAAGACCAGTTGGAGATATCGGTT ATCTGCAACTGCTCGGAAGCCAATGTGAACCTCCATATGGGAAATATTCGGCGGAAGTTCGGTGTGACCTCCCGC CGCGTAGCGCCATTATGGCCGTTAATTTGGGTCTTATTACTCTCTAATAA                                                                                                                                                                                                                                                                                                                                                                                                                                                                                                                                                                                                                                                                                                                                                                                                                                                                                                             |
| K575037 | BBa_ J2311-<br>BBa_ B0034-<br>rhIR-<br>BBa_ B0015-<br>pRhLAB<br>- BBa_ B0034-<br>GFPmut 3b | TCCTGTGAAATCTGGCAGTTACCGTTAGCTTTCGAATTGGCTAAAAAGTGTCTACTAGAGAAAAGAGGAGAAATA CTAGATGCGTAAAGGAGAAGAAGCTTTTCACTGGAGTGTCCCAATCTTGTGTAATTAGATGGTGTATGTTAATGG GCACAAATTTTCTGTGAGTGGAGAGGGTGAAGGTGATGCAACATACGGAAAACCTTACCCTTAAATTTATTTGCAC TACTGGAAAACCTACCTGTTCCATGGCCAACACTTGTCACTACTTTTCGGTTATGGTGTCAATGCTTTGCGAGATA CCCAGATCATATGAAACAGCATGACTTTTTCAAGAGTGCATGCCGGAAGGTTATGTACAGGAAAGAACTATATT TTTCAAAGATGACGGGAACCTACAAGACACGTTGCAAGTCAAGTTGAAGGTGCAAGTTGAAGGTGCAAGTTGCA GTTAAAAGGTATTGATTTTAAAGAAGATGGAAACATCTTGGACACAAATGGAAATACTATAACTACACACAA TGTATACATCATGGCAGACAAAACAAAAGATGGAATCAAAGTTAACTTCAAATTAGACACAAACATTTGAAGATGG AAGCGTTCAACTAGCAGACCATTTCAACAAAATACTCCAATTGGCGATGGCCCTGTCTTTTACCAGACAACCA TTACCTGTCCACACAATCTGCCCTTTCGAAAGATCCAACGAAAAGAGAGACACATGGTCTTCTTGAGTTGT AACAGCTGCTGGGATTACACATGGCATGGATGAACATACAAAATAATACTAGAGTTGACAGCTAGCTCAGTC CTAGGTATAATGCTAGCTACTAGAGAAAAGGAGAAAATACTAGATGAGGAATGACGGAGGCTTTTTGCTGTGGTG GGACGGTTTGGCTAGCGAGATGCAGCCGATCCACGACAGCCAGGGCGTGTTCGCCGCTTGGAAAAGGAAAGTGGC GCGCCTGGGCTTCGATTACTACGCCATATGGCGTGCACACAGATFCCCTTCACCCGGCCGAAGACCGGATCCA TGGCACCTATCCCAAGGCTGGCTGGAGCGATACCAGATGCAGAACTACGGGGCCGTGGATCCGGCGATCCTCAA CGGCCCTGCGCTCCTCGGAAATGGTGGTCTGGAGCGACAGCCTGTTCCGACAGAGCCGGATGCTCTGGAACGAGGC TCGCGATTGGGGCTCTGTGTCGGCCGACCTTCCGATCCGCGCCGCAACAATTTGCTCAGCGTGTCTTCCGT GGCGCGCAGCAGCAGAACATCTCCAGCTTCGAGCGCAGGAAATCCGCCCTGCGGTGCGTTGCATGATCGGATTT GCTGACCCAGAAGCTGACCGACCTGGAGCATCCGATGCTGATGTCCAACCCGGTCTGCTGAGCCATCGCGAACC GAGATCCTGCAATGGACCGCCGACGGCAAGATTCGGGGAAATCGCCATCATCTGAGCATCTCCGAGAGCAC GGTGAACTTCCACCACAAGAACATCCAGAAGAAGTTCGACGCGCCGAACAAGACGCTGGCTGCCGCTACGCCGC GCGCTGGGTCTCATCTAATAA |
| MC001A  | pT7-<br>RBS-<br>lasI-<br>T7 term                                                           | TAATACGACTCACTATAGGGGAATTGTGAGCGGATAACAATTCGCCCTCTAGAAAATAATTTTGTTTAACTTTAAGA AGGAGATATACATATGATCGTTCAGATCGGTGCTGCTGAAGAGTTCGACAAAAAAGTGCCTGGGTGAAATGCACA AACTGCGTGCCTCAGGTTTTCAAAGAAGCTAAAGGTTGGGACGTTTTCCGTTATCGACGAAATGGAATCGACGGTT ACGACGCTCTGTCCCGTACTACATGCTGATCCAGGAAGACACCCCGGAAGCTCAGGTTTTCCGGTTGCTGGCGTA TCTTCGACACCACCGTCCGTACATGCTGAAAAACACCTTCCCGAACTGCTGCAGGTAAGAAAGTCCGTGCT CCCCGCACATCTGGGAACTGTCCCGTTTCGCTATCAACTCCGGTCCAGAAAGGTTCCCTGGGTTTCTCCGACTGCA CCCTGGAAGCTATGCGTGTCTGGCTGCTTACTCCTTGCAGAACGACATCCAGACCTGGTTACCCTTACCACCG TTGGTGTGAAAAATGATGATCCGTGCTGGTCTGGACGTTTTCCGTTCCGGTCCGACCTGAAAATCGGGTATCG AACGTGCTGTGCTCTGCGTATCGAACTGAACGCTAAAACCCAGATCGCTCTGCAGGTTGTTCTGGTTGAAAC AGCGTCTGGCTGTTTTCCTAAGCGGATCCGAATTCGAGCTCCGTCGACAAGCTTGCAGCCGACTCGAGCACCACCA CCACCACCCTGAGATCCGGCTGCTAACAAAGCCGAAAGGAAAGCTGAGTTGGCTGCTGCCACCGCTGAGCAATA ACTAGCATAACCCCTTGGGGCTCTAACCGGCTTGGAGGGTTTTTTG                                                                                                                                                                                                                                                                                                                                                                                                                                                                                                                                                                                                                                                                                                                                               |
| MC002A  | pT7-<br>RBS-<br>luxI-<br>T7 term                                                           | TAATACGACTCACTATAGGGGAATTGTGAGCGGATAACAATTCGCCCTCTAGAAAATAATTTTGTTTAACTTTAAGA AGGAGATATACATATGACTATAATGATAAAAAAATCCGATTTTTGGCAATTCATCCGAGGAGTATAAAGGTA TTCTAAGTCTTCGTTATCAAGTGTTTAAGCAAAAGACTTGGTGGACTTAGTTAGAAAATAACCTGAACTCAG ATGAGTATGATAAATCAATGCAGAAATATATTTATGCTTGTGATGATACTGAAAATGTAAGTGGATGCTGGCGTT TATTACCTACAACAGGTGATATATGCTGAAAAGTGTTTTTCCCTGAATTGCTTGGTCAACAGAGTCTCCCAAAG ATCCTAATATAGTCGAATTAAGTCGTTTTGCTGTAGGTAATAAGTCAAGATAAATAACTCTGCTAGTGAAAT TACAATGAACTATTTGAAGCTATATATAAACACCGCTGTAGTCAAGGATTAACAGAAATATGTAACAGTAAACAT CAACAGCAATAGAGCGATTTTTAAAGCGTATTAAGTTCCTTGTCACTGATTTGGAGACAAGAAATTCATGTAT TAGGTGATACTAAATCGGTTGATTTGCTATGCTATTAATGAACAGTTTTAAAAAGCAGTCTTAAATTAAGCGGG ATCCGAATTCGAGCTCCGTCGACAAGCTTGGCGCCGACTCGAGCACCACCACCACCCTGAGATCCGGCTGC TAACAAAGCCCGAAAGGAAAGCTGAGTTGGCTGCTGCCACCGCTGAGCAATAACTAGCATAACCCCTTGGGGCCTC TAAACGGGCTCTGAGGGTTTTTTG                                                                                                                                                                                                                                                                                                                                                                                                                                                                                                                                                                                                                                                                                                                                                                            |
| MC003A  | pT7-<br>RBS-<br>rhII-<br>T7 term                                                           | TAATACGACTCACTATAGGGGAATTGTGAGCGGATAACAATTCGCCCTCTAGAAAATAATTTTGTTTAACTTTAAGA AGGAGATATACATATGATCGAAGTGTCCGAATCCCTGGAAGGCTGTCCGCTGCTATGATCGCTGAACTGGG TCGTTACCCTCACCAGGTTTTTCATCGAAAACCTGGGTTGGGACGTTGTTTCCACCTCCCGTGTTCGTCGACCCAGGA GTTCGACCAAGTTCGACACCAGCCGACAGCCGTTACATCGTTGCTATGTCCGCTCAGGATATCGCGGTTGCCGCTC GCTGCTGCCGACCACCGACGCTTACCTGCTGAAAGACGTTTTTCGCTTACCCTGTGCTCCGAAACCCCGCCGTCGGA CCCGTCGGTTTGGGAACTGTCCCGTTACGCTGCTTCCGCTGCTGACGACCCGACGCTGGCTATGAAAATCTTCTG GTCCTCCCTCCAGTGCCTTGGTACCTGGGTGCTTCCCTCCGTTGTTGCTGTTACCACCACCGCTATGGAACGTTA CTTCCGTTCCGTAACGGTGTATCCCTCCAGCGTTCGGTCCGCGCAGAAAAGTTAAAGGTGAAACCCCTGTTGCTAT CTCTTCCCGCTTACCAGGAACGTTGGTCTGGAATGCTGCTGCGTTACCACCAGGAAATGGCTCCAGGTTGTTCC GCTGTCCATGGCTGTTTAAGCGGATCCGAATTCGAGTCCGTCGACAAGCTTCCGCGCCGACTCGAGCACCACCAC CACCACCCTGAGATCCGGCTGCTAACAAAGCCCGAAAGGAAAGCTGAGTTGGCTGCTGCCACCGCTGAGCAATAA CTAGCATAACCCCTTGGGGCCTCTAACCGGCTTGGAGGGTTTTTTG                                                                                                                                                                                                                                                                                                                                                                                                                                                                                                                                                                                                                                                                                                                                    |

|                                                                                                                               |                                                                                                                                                                                                                                                                                                                                                                                                                                                                                                                                                                                                                                                                                                                                                                                                                                                                                                                                                                                                                                                                                                                                                                                                                                                                                                                                                                                                                                                                                                                                                                                                                                                                                                                                                                                                                                                                                                                                                                                                                                                                                                              |
|-------------------------------------------------------------------------------------------------------------------------------|--------------------------------------------------------------------------------------------------------------------------------------------------------------------------------------------------------------------------------------------------------------------------------------------------------------------------------------------------------------------------------------------------------------------------------------------------------------------------------------------------------------------------------------------------------------------------------------------------------------------------------------------------------------------------------------------------------------------------------------------------------------------------------------------------------------------------------------------------------------------------------------------------------------------------------------------------------------------------------------------------------------------------------------------------------------------------------------------------------------------------------------------------------------------------------------------------------------------------------------------------------------------------------------------------------------------------------------------------------------------------------------------------------------------------------------------------------------------------------------------------------------------------------------------------------------------------------------------------------------------------------------------------------------------------------------------------------------------------------------------------------------------------------------------------------------------------------------------------------------------------------------------------------------------------------------------------------------------------------------------------------------------------------------------------------------------------------------------------------------|
| <p>NY008A</p> <p>pTet-<br/>Bba_ B0034-<br/>lasR-<br/>Bba_ B0015-<br/>pLuxR-<br/>Bba_ B0032-<br/>GFPmut 3b-<br/>Bba_ B0015</p> | <p>TCCCTATCAGTGATAGAGATTGACATCCCTATCAGTGATAGAGATACTGAGCACTACTAGAGAAAGAGGAGAAA<br/>TACTAGT<b>ATG</b>GCCTTGGTTGACGGTTTTCTTGAGCTGGAACGCTCAAGTGGAAAATTGGAGTGGAGCGCCATCCT<br/>CCAGAAGATGGCGAGCGACCTTGGATTCTCGAAGATCCTGTTCGGCTGTTCGCTAAGGACGCCAGGACTACGA<br/>GAACGCCTTCATCGTCGGCAACTACCCGGCCCTGGCGGAGCATTACGACC GGCTTCGAACATCCGGTCAGCAA<br/>CCCGACGGTCAGTCACTGTACCAGAGCGTACTGCCGATTTTCTGGGAACCGTCCATCTACCAGACGCGAAAGCA<br/>GCACGAGTTCTTCGAGGAAGCCTCGCCCGCGCCCTGGTGTATGGCTGACCATGCCGCTGCATGTTGCTCGCGG<br/>CGAACTCGGCGCGCTGAGCCTCAGCGTGAAGCGGAAAACCGGGCCGAGGCCAACCGTTTCATAGAGTCCGGTCT<br/>GCCGACCCTGTGGATGCTCAAGGACTACGCACTGCAAAAGCGGTGCCGACTGGCCTTCGAACATCCGGTCAGCAA<br/>ACCGGTGGTTCTGACCAGCCGGGAGAAGGAAGTGTGCAGTGGTGCGCCATCGGCAAGACCAGTTGGGAGATATC<br/>GGTTATCTGCAACTGCTCGGAAGCCAAATGTGAAGTCCATATGGGAAATATTCGGCGGAAGTTCCGGTGTGACCTC<br/>CCGCCGCTAGCGGCCATTATGGCCGTTAATTTGGGTCTTATTACTCTC<b>TA</b>AACACTGATAGTGTAGTGTAGATC<br/>ACTACTAGAGCCAGGCATCAAAATAAAACGAAAGGCTCAGTCGAAAGACTGGGCCTTTCGTTTTATCTGTTGTTG<br/>TCGGTGAACGCTCTCTACTAGAGTCACTGGCTCACCTTCGGGTGGCCCTTCTCGGCTTTATATACTAGAGACC<br/>TGTAGGATCGTACAGGTTTACGCAAGAAAATGGTTTGTATAGTCGAATAAAATACTAGAGTCACACAGGAAAGT<br/>ACTAG<b>ATG</b>CGTAAAGGAGAAGAACTTTTCACTGGAGTGTCCCAATCTTGTGAAATTAGATGGTGTATGTTAATG<br/>GGCACAAATTTCTGTCACTGGAGGGGTGAAGGTGATGCAACATACGGAACACTTACCTTAAATTTATTTGCA<br/>CTACTGGAAAACCTCTGTTCCATGGCCAACTTGTCACTACTTTCGGTTATGGTGTCAATGCTTTCGGAGAT<br/>ACCCAGATCATATGAAACAGCATGACTTTTTCAAGAGTGCATGCCGCAAGGTTATGTACAGGAAAGAACTATAT<br/>TTTTCAAAGATGACGGGAACACAGACACGCTGCTGAAGTCAAGTTGAAGGTGATACCTTGTAAATAGATCG<br/>AGTTAAAGGTATTGATTTTTAAAGAAGATGAAAACATCTTGGACACAAATTTGGAATACAACATAACTCACACA<br/>ATGTATACATCATGGCAGACAAAACAAAAGAATGGAATCAAAGTAACTTCAAATAGACACAACATGAAGATG<br/>GAAGCGTTCACTAGCAGACCACTTTTCAACAAAATACTCCAATTTGGCGATGGCCCTGTCTTTTTACAGACAAAC<br/>ATTACCTGTCCACACAATCTGCCCTTTCGAAAGATCCCAACGAAAAGAGAGACCACATGGTCTTCTTGAGTTG<br/>TAACAGCTGCTGGGATTACACATGGCATGGATGAAGTATACAAA<b>TA</b>AATAACTAGAGCCAGGCATCAAAATAAA<br/>CGAAAGGCTCAGTCGAAAGACTGGGCCTTTCGTTTTATCTGTTGTTTGTCCGGTGAACGCTCTCTACTAGAGTCA<br/>ACTGGCTCACCTTCGGGTGGCCCTT</p> |
| <p>NY009A</p> <p>pTET-<br/>Bba_ B0034-<br/>LUXR*-<br/>Bba_ B0015-<br/>pluxR-<br/>Bba_ B0032-<br/>luxI-<br/>Bba_ B0015</p>     | <p>TCCCTATCAGTGATAGAGATTGACATCCCTATCAGTGATAGAGATACTGAGCACTACTAGAGAAAGAGGAGAAA<br/>TACTAG<b>ATG</b>AAAAACATAAATGCCGACGACACATACAGAATAATTAATAAAATTAAGCTTGTAGAAGCAATAAT<br/>GATATTAATCAATGCTTATCTGATATGGCGAAAATGGTACATTTGTAATATATTACTCGCGATCATTTATCCT<br/>CATTCTATGGTTAAATCTGATATTTCAATCCTAGATAATTACCCTAAAAAATGGAGGCAATATTATGATGACGCT<br/>AATTTAATAAAATATGATCCTATAGTAGATTATTTCAACTCAATCAATCAATCAATCAATCAATCAATCAATCAAT<br/>AACAAATGCTGTAATAAAAAATCTCCAATGTAATTAAGAAGCGAAAACAGCGGGTCTTATCACTGGGTTTAGT<br/>TTCCTTATTCATACGGCTAACAAATGGCTTCGGAATCTTAGTTTTGCACATTCAGAAAAAGACAACATATATAGAT<br/>AGTTTTATTTTACATGCGTGTATGAACATAACCATAATTTGTTCTCTCTAGTTGATAATATCGAAAAATAAAT<br/>ATAGCAAATAATAAATCAAAACAACGATTTAACCAAAAAGAGAAAAAGAATGTTTAGCGTGGGCATCGGAAGGAAA<br/>AGCTCTTGGGATATTTCAAAAATATTAGGTTGCAGTGAGCGTACTGTCACTTTCCATTTAACCAATGCGCAAAATG<br/>AAACTCAATACAACAACCGCTGCCAAAGTATTTCTAAAGCAATTTAACAGGAGCAATTGATTGCCATACTTT<br/>AAAAAT<b>TA</b>AATAACACTGATAGTGTAGTGTAGATCACTACTAGAGCCAGGCATCAAAATAAAACGAAAGGCTCAGT<br/>CGAAAGACTGGGCCTTTCGTTTTATCTGTTGTTTGTTCGGTGAACGCTCTCTACTAGAGTCACTGGCTCACCTT<br/>CGGGTGGCCCTTTCGCTTTATATACTAGAGACCTGTAGGATCGTACAGGTTTACGCAAGAAAATGGTTTGTGTTA<br/>TAGTCGAATAAAATACTAGAGTCACACAGGAAAGTACTAG<b>ATG</b>ACTATAATGATAAAAAAATCGGATTTTTTGG<br/>CAATTCATCGGAGGAGTATAAAGGTATTTCAAGTCTTCGTTATCAAGTGTTTAAGCAAGACTTGGTGGGACT<br/>TAGTTGTAGAAAATAACCTTGAATCAGATGAGTATGATAACTCAATGCAGAATATATTTATGCTTGTGATGATA<br/>CTGAAAATGTAAGTGGATGCTGGCGTTTTATTTACCTACAACAGGTGATATATGCTGAAAAGTGTTTTTCTCGAAT<br/>TGCTTGGTCAACAGAGTGTCCCAAAGATCCTAATATAGTCGAATTAAGTCGTTTTGCTGTAGGTAATAAATAGCT<br/>CAAAGATAAAATACTCTGCTAGTGAATTAACAATGAAACTATTTGAAAGCTATATATAAACAGCTGTAGTCAAG<br/>GTATTACAGAATATGTAACAGTAACATCAACAGCAATAGAGCGATTTTTAAAGCGTATTAAGGTTCCCTGTGCATC<br/>GTATTGGAGACAAAGAAATTCATGTATTAGGTGATACTAAATCGGTTGATTTGCTATGCTCATTATTAAGAACAGT<br/>TTAAAAAAGCAGCTTTAAATTA<b>TA</b>AATAACTAGAGCCAGGCATCAAAATAAAACGAAAGGCTCAGTCGAAAGAC<br/>TGGCCCTTTCGTTTTATCTGTTGTTTGTTCGGTGAACGCTCTCTACTAGAGTCACTGGCTCACCTTCGGTGGG<br/>CCTTCTCGCTTTATA</p>                                                                        |
| <p>NY013A</p> <p>pTET-<br/>Bba_ B0034-<br/>luxR*-<br/>Bba_ B0015-<br/>pluxR-<br/>Bba_ B0032-<br/>luxI*-<br/>Bba_ B0015</p>    | <p>TCCCTATCAGTGATAGAGATTGACATCCCTATCAGTGATAGAGATACTGAGCACTACTAGAGAAAGAGGAGAAA<br/>TACTAG<b>ATG</b>AAAAACATAAATGCCGACGACACATACAGAATAATTAATAAAATTAAGCTTGTAGAAGCAATAAT<br/>GATATTAATCAATGCTTATCTGATATGGCGAAAATGGTACATTTGTAATATATTACTCGCGATCATTTATCCT<br/>CATTCTATGGTTAAATCTGATATTTCAATCCTAGATAATTACCCTAAAAAATGGAGGCAATATTATGATGACGCT<br/>AATTTAATAAAATATGATCCTATAGTAGATTATTTCAACTCAATCAATCAATCAATCAATCAATCAATCAATCAAT<br/>AACAAATGCTGTAATAAAAAATCTCCAATGTAATTAAGAAGCGAAAACAGCGGGTCTTATCACTGGGTTTAGT<br/>TTCCTTATTCATACGGCTAACAAATGGCTTCGGAATCTTAGTTTTGCACATTCAGAAAAAGACAACATATAGAT<br/>AGTTTTATTTTACATGCGTGTATGAACATAACCATAATTTGTTCTCTCTAGTTGATAATATCGAAAAATAAAT<br/>ATAGCAAATAATAAATCAAAACAACGATTTAACCAAAAAGAGAAAAAGAATGTTTAGCGTGGGCATCGGAAGGAAA<br/>AGCTCTTGGGATATTTCAAAAATATTAGGTTGCAGTGAGCGTACTGTCACTTTCCATTTAACCAATGCGCAAAATG<br/>AAACTCAATACAACAACCGCTGCCAAAGTATTTCTAAAGCAATTTAACAGGCAATTTAACAGGCAATTTGATGCCATTT<br/>AAAAAT<b>TA</b>AATAACACTGATAGTGTAGTGTAGATCACTACTAGAGCCAGGCATCAAAATAAAACGAAAGGCTCAGT<br/>CGAAAGACTGGGCCTTTCGTTTTATCTGTTGTTTGTTCGGTGAACGCTCTCTACTAGAGTCACTGGCTCACCTT<br/>CGGGTGGCCCTTTCGCTTTATATACTAGAGACCTGTAGGATCGTACAGGTTTACGCAAGAAAATGGTTTGTGTTA<br/>TAGTCGAATAAAATACTAGAGTCACACAGGAAAGTACTAG<b>ATG</b>ACTATAATGATAAAAAAATCGGATTTTTTGG<br/>CAATTCATCGGAGGAGTATAAAGGTATTTCAAGTCTTCGTTATCAAGTGTTTAAGCAAGACTTGGTGGGACT<br/>TAGTTGTGGAAATAACCTTGAATCAGATGAGTATGATAACTCAATGCAGAATATATTTATGCTTGTGATGATA<br/>CTGAAAATGTAAGTGGATGCTGGCGTTTTATTTACCTACAACAGGTGATATATGCTGAAAAGTGTTTTTCTCGAAT</p>                                                                                                                                                                                                                                                                                                                                                                                                                                                                                                                                                                                             |

|        |                                                                                                             |                                                                                                                                                                                                                                                                                                                                                                                                                                                                                                                                                                                                                                                                                                                                                                                                                                                                                                                                                                                                                                                                                                                                                                                                                                                                                                                                                                                                                                                                                                                                                                                                                                                                                                                                                                                                                                                                                                                                                                                                                                                                                                                                                                                                                                                                                                                                                                                                                                                                                                                                                                                                |
|--------|-------------------------------------------------------------------------------------------------------------|------------------------------------------------------------------------------------------------------------------------------------------------------------------------------------------------------------------------------------------------------------------------------------------------------------------------------------------------------------------------------------------------------------------------------------------------------------------------------------------------------------------------------------------------------------------------------------------------------------------------------------------------------------------------------------------------------------------------------------------------------------------------------------------------------------------------------------------------------------------------------------------------------------------------------------------------------------------------------------------------------------------------------------------------------------------------------------------------------------------------------------------------------------------------------------------------------------------------------------------------------------------------------------------------------------------------------------------------------------------------------------------------------------------------------------------------------------------------------------------------------------------------------------------------------------------------------------------------------------------------------------------------------------------------------------------------------------------------------------------------------------------------------------------------------------------------------------------------------------------------------------------------------------------------------------------------------------------------------------------------------------------------------------------------------------------------------------------------------------------------------------------------------------------------------------------------------------------------------------------------------------------------------------------------------------------------------------------------------------------------------------------------------------------------------------------------------------------------------------------------------------------------------------------------------------------------------------------------|
|        |                                                                                                             | <p>TGCTTGGTCAACAGAGTGTCTCCCAAAGATCCATAATATAGTCGAATTAAGTCGTTTTGCTGTAGGTAAAAATAGCTCAAAGATAAACTCTGCTAGTGAATTAACAATGAAACTATTTGAACTATATATAAACACGCTGTTAGTCAAGGTATTACAGAATATGTAACAGTAACATCAACAGCAATAGAGCGATTTTAAAGCGTATTAAGTTCCTTGTGCATC GTATTGGAGACAAAGAAATTCATGTATTAGTGTACTAAATCGGTTGTATTGTCTATGCCTATTATGAACAGT TTA AAAAAGCAGTCTTAAAT<b>TAATA</b>TAATACTAGAGCCAGGCATCAAATAAACGAAAGGCTCAGTCGAAAGACTGG GCCTTTCGTTTTATCTGTTGTTTGTGCGGTGAACGCTCTCTACTAGAGTCACACTGGCTCACCTTCGGGTGGGCC TTTCTGCGTTTTATA</p>                                                                                                                                                                                                                                                                                                                                                                                                                                                                                                                                                                                                                                                                                                                                                                                                                                                                                                                                                                                                                                                                                                                                                                                                                                                                                                                                                                                                                                                                                                                                                                                                                                                                                                                                                                                                                                                                                                                                                                                                                                                                                                |
| NY014A | <p>pTET-<br/>Bba_ B0034-<br/>luxR-<br/>Bba_ B0015-<br/>pluxR-<br/>Bba_ B0032-<br/>luxI*-<br/>Bba_ B0015</p> | <p>TCCCTATCAGTGATAGAGATTGACATCCCTATCAGTGATAGAGATACTGAGCACTACTAGAGAAAGAGGAGAAA TACTAG<b>ATG</b>AAAAACATAAAATGCCGACGACACATACAGAATAATTAATAAAAATAAAGCTTGTAGAAGCAATAAT GATATTAATCAATGCTTATCTGATATGACTAAAATGGTACATTGTGAATATTATTTACTCGCGATCATTTATCCT CATTCATGTTAAATCTGATATTTCAATCCTAGATAAATACCCTAAAAAATGGAGGCAATATTATGATGACGCT AATTTAATAAAAATATGATCCTATAGTAGATTATTTAACTCCAATCATTCACCAATTAATTTGGAATATATTTGAA AACAAATGCTGTAATAAAAAATCTCCAAATGTAATTAAGAGCGAAAAACATCAAGTCTTATCACTGGGTTTAGT TTCCCTATTCCATACGGCTAACAAATGGCTTCGGAATGCTTAGTTTTGCACATTAGAAAAAGACAACATATAGAT AGTTTTATTTTACATGCGTGTATGAACATACCATTAAATGTTCTCTCTAGTTGATAATATCGAAAAATAAAT ATAGCAAATAAATAAACAACAGATTAAACAAAAAGAGAAAAAGAAATGTTAGCGTGGGCATGCGAAGGAAAA AGCTCTGGGATATTTCAAAAATATAGGTTGCAGTGAGCGTACTGTCACTTTCCATTTAACCAATGCGCAAAATG AAACCAATAACAACAACCGCTGCCAAAGTATTTCTAAAGCAATTTAACAGGAGCAATTGATTGCCATACTTT AAAAATAA<b>TAATA</b>TAACACTGATAGTGTAGTGTAGATCACTACTAGAGCCAGGCATCAAATAAACGAAAGGCTC AGTCGAAAGACTGGGCCCTTTTCGTTTTATCTGTTGTTTGTGCGGTGAACGCTCTCTACTAGAGTCACACTGGCTCAC CTTCCGGTGGGCCCTTTCTGCGTTTTATATACTAGAGACCTGTAGGATCGTACAGTTTACGCAAGAAAATGGTTTTG TTATAGTCAATAAATACTAGAGT<b>CACACAGGAAAGTACTAG<b>ATG</b></b>ACTATAATGATAAAAAATCGGATTTTTT TGGCAATCCATCGGAGGAGTAAAGGATTTCTAAGTCTCGTTATCAAGTGTAAAGCAAGACTTGGGTGGG ACTTAGTTGTGGAAATAACCTTGAATCAGATGAGTATGATAACTCAAATGCAGATAATATTTATGCTTGTGATG ATACTGGAAATGTAAGTGGATGCTGGCGTTTTATTACCTACAACAGGTGATATATGCTGAAAAGTGTTCCTG AATTGCTTGGTCAACAGAGTGTCTCCAAAGATCTTAATATAGTCGAATTAAGTCTGTTTGTCTGAGGTAATAA GCTCAAAGATAAATAACTCTGCTAGTGAATTAACAATGAAACTATTTGAAGCTATATATAAACACGCTGTAGTC AAGGTATTACAGAATATGTAACAGTAACATCAACAGCAATAGAGCGATTTTAAAGCGTATTAAGTTCCCTGTG C ATCGTATTGGAGACAAAGAAATTCATGTATTAGGTGATACAAATCGGTTGTATTGTCTATTAATGAAC AGTTTTAAAAAGCAGTCTTAAAT<b>TAATA</b>TAATACTAGAGCCAGGCATCAAATAAACGAAAGGCTCAGTCGAAAGAC TGGGCCCTTTTCGTTTTATCTGTTGTTTGTGCGGTGAACGCTCTCTACTAGAGTCACACTGGCTCACCTTCGGGTGGG CCTTTCTGCGTTTTATA</p>                                                                                                                                                                                                                                                                                                                                                                                                                                                                                                                                                                                                                                                               |
| NY016A | <p>pTET-<br/>Bba_ B0034-<br/>luxR*-<br/>Bba_ B0015-<br/>pluxR-<br/>Bba_ B0032-<br/>HLPT-<br/>Bba_ B0015</p> | <p>TCCCTATCAGTGATAGAGATTGACATCCCTATCAGTGATAGAGATACTGAGCACTACTAGAGAAAGAGGAGAAA TACTAG<b>ATG</b>AAAAACATAAAATGCCGACGACACATACAGAATAATTAATAAAAATAAAGCTTGTAGAAGCAATAAT GATATTAATCAATGCTTATCTGATATGGCGAAAATGGTACATTGTGAATATTATTTACTCGCGATCATTTATCCT CATTCATGTTAAATCTGATATTTCAATCCTAGATAAATACCCTAAAAAATGGAGGCAATATTATGATGACGCT AATTTAATAAAAATATGATCCTATAGTAGATTATTTAACTCCAATCATTCACCAATTAATTTGGAATATATTTGAA AACAAATGCTGTAATAAAAAATCTCCAAATGTAATTAAGAGCGAAAAACAGCGGCTTTATCACTGGGTTTAGT TTCCCTATTCCATACGGCTAACAAATGGCTTCGGAATCTTAGTTTTGCACATTAGAAAAAGACAACATATAGAT AGTTTTATTTTACATGCGTGTATGAACATACCAATTAATTTGTTCTCTCTAGTTGATAATATCGAAAAATAAAT ATAGCAAATAAATAAACAACAGATTAAACAAAAAGAGAAAAAGAAATGTTAGCGTGGGCATGCGAAGGAAAA AGCTCTGGGATATTTCAAAAATATAGGTTGCAGTGAGCGTACTGTCACTTTCCATTTAACCAATGCGCAAAATG AAACCAATAACAACAACCGCTGCCAAAGTATTTCTAAAGCAATTTAACAGGAGCAATTGATTGCCATACTTT AAAAAT<b>TAATA</b>TAACACTGATAGTGTAGTGTAGATCACTACTAGAGCCAGGCATCAAATAAACGAAAGGCTCAGT CGAAAGACTGGGCCCTTTTCGTTTTATCTGTTGTTTGTGCGGTGAACGCTCTCTACTAGAGTCACACTGGCTCACCTT CGGGTGGGCCCTTTCTGCGTTTTATATACTAGAGACCTGTAGGATCGTACAGTTTTACGCAAGAAAATGGTTTGTTA TAGTCGAATAAATACTAGAGT<b>CACACAGGAAAGTACTAG<b>ATG</b></b>CCGTTGTTAGATAGGCTTCACAGTCGATCATA CCCGGATGGAAGCGCCTGCAGTTCCGGTGGCGAAAAACAATGAACACCCCGATGGCGACGCAATACCCTGTTCTG ATCTGCGCTTCTGCGTGCCGAACAAGAAGTGTAGTCCAGAAAGAGGGATCCATACCCTGGAGCACCTGTTTGTG TGTTTTATGCGTAACCATCTTAACGGTAATGGTGTAGAGATTATCGATATCTCGCCATGGGCTGCCGACCGGTT TTTATATAGTCTGATTGGTACGCCAGATGAGCAGCGTGTGCTGATGCCTGGAAGCGGCAATGGAAGACGTGC TGAAGTGCAGGATCAGAATCAGATCCCGAAGTGAACGCTTACCAGTGTGGCATTACCAGTGCATCGTCTGC AGGAAGCGCAGGATATTGCGGTAGCATTTCCGAAAGTGAACGTCACGATCAACAGCAAGCAAGAACTGGCACTGC CGAAAGAGAAGTTGCAGGAAGTGCACATCgcccgaagatccgacctcgagatATGAAAATCGGCATCATTTGGTG CAATGGAAGAGAAGTTACGCTGCTGCGTGACAAAATCGAAAACCGTCAAACATATCAGTCTCGGCGGTTGCGAAA TCTATACCGGCAACTGAATGGAACCGAGGTTGCGCTTCTGAAATCGGCACTCGGTAAGTCTGCGCGCTGG GTGCCACTTTGCTGTTGGAACACTGCAAGCCAGATGTGATTATTAACACCGGTTCTGCGGTGGCTGGCACCAA CGTTGAAAGTGGCGATATCGTTGCTCGGACGAAGCAGTTATCACGACCGGATGTCACGGCATTGGTTATG AATACGGTCAGTTACCAGGCTGTCCGGCAGGCTTTAAAGCTGACGATAAACTGATCGTCCGCTGAGGCTGCA TTGCCGAAGTGAATCTTAACGCTGTACGTGGCCTGATTGTTAGCGGCGACGCTTTCATCAACGCTCTGTGGTC TGGCGAAAATCCGCCACAACCTCCACAGGCCATTTGCTGTAGAGATGGAAGCGACGGCAATCGCTGCTGCC ACAATTTCAACGTCCTGTTGTTGCTGACGCGCATCTCCGACGTGGCCGATCAACAGTCTCATCTAGCTTCG ATGAGTTCTGGCTGTTGCCGCTAAACAGTCCAGCCTGATGGTTGAGTCACTGGTGCAGAAACTTGCACATGGCT <b>AA</b>TACTAGAGCCAGGCATCAAATAAACGAAAGGCTCAGTCGAAAGACTGGGCCCTTTTCGTTTTATCTGTTGTTG TCGGTGACGCTCTCTACTAGAGTCACTGGCTCACCTTCGGGTGGGCCCTTTCTGCGTTTTATA</p> |
| NY017A | <p>pTET-<br/>Bba_ B0034-<br/>luxR*-</p>                                                                     | <p>TCCCTATCAGTGATAGAGATTGACATCCCTATCAGTGATAGAGATACTGAGCACTACTAGAGAAAGAGGAGAAA TACTAG<b>ATG</b>AAAAACATAAAATGCCGACGACACATACAGAATAATTAATAAAAATAAAGCTTGTAGAAGCAATAAT GATATTAATCAATGCTTATCTGATATGGCGAAAATGGTACATTGTGAATATTATTTACTCGCGATCATTTATCCT CATTCATGTTAAATCTGATATTTCAATCCTAGATAAATACCCTAAAAAATGGAGGCAATATTATGATGACGCT</p>                                                                                                                                                                                                                                                                                                                                                                                                                                                                                                                                                                                                                                                                                                                                                                                                                                                                                                                                                                                                                                                                                                                                                                                                                                                                                                                                                                                                                                                                                                                                                                                                                                                                                                                                                                                                                                                                                                                                                                                                                                                                                                                                                                                                                                                                    |

|                                                    |                                                    |                                                                                                                                                                                                                                                                                                                                                                                                                                                                                                                                                                                                                                                                                                                                                                                                                                                                                                                                                                                                                                                                                                                                                                                                                                                                                                                                                                                                                                                                                                                                                                                                                                                                                                                                                                                                                                                                                                           |
|----------------------------------------------------|----------------------------------------------------|-----------------------------------------------------------------------------------------------------------------------------------------------------------------------------------------------------------------------------------------------------------------------------------------------------------------------------------------------------------------------------------------------------------------------------------------------------------------------------------------------------------------------------------------------------------------------------------------------------------------------------------------------------------------------------------------------------------------------------------------------------------------------------------------------------------------------------------------------------------------------------------------------------------------------------------------------------------------------------------------------------------------------------------------------------------------------------------------------------------------------------------------------------------------------------------------------------------------------------------------------------------------------------------------------------------------------------------------------------------------------------------------------------------------------------------------------------------------------------------------------------------------------------------------------------------------------------------------------------------------------------------------------------------------------------------------------------------------------------------------------------------------------------------------------------------------------------------------------------------------------------------------------------------|
| <p>BBa_ B0015-pluxR-BBa_ B0032-aiiA-BBa_ B0015</p> | <p>BBa_ B0015-pluxR-BBa_ B0032-aiiA-BBa_ B0015</p> | <p>AATTTAATAAAATATGATCCTATAGTAGATTATTTCTAACTCCAATCATTCACCAATTAATTTGGAATATATTTGAA<br/> AACAAATGCTGTAAATAAAAAATCTCCAAATGTAATTAAGAAAGCGAAAAACAGCGGGTCTTACTACCTGGGTTAGT<br/> TTCCCTATTCATACGGCTAACAAATGGCTTCGGAATTCCTTAGTTTTGCACATTCAGAAAAAGACAATATATAGAT<br/> AGTTTTATTTTTACATGCGTGTATGAACATAACCATTAAATGTTCTCTCTAGTTGATAATATCGAAAAATAAAT<br/> ATAGCAAATAATAAATCAAACAACGATTTAAACAAAAGAGAAAAAGAAATGTTTAGCGTGGGCATGCGAAGAAAA<br/> AGCTCTTGGGATATTTCAAATAATTAGGTTGCAGTGAGCGTACTGTCACTTTCCATTTAAACCAATGCGCAAAATG<br/> AACTCAATACAACAACCCGCTGCCAAAGTATTTCTAAAGCAATTTAACAGGAGCAATTTGATGGCCACTACTTT<br/> AAAAAT<b>TA</b>AATAACACTGATAGTGTAGTGTAGATCACTACTAGAGCCAGGCATCAAATAAAAAAGAAAGGCTCAGT<br/> CGAAAGACTGGGCCCTTTCGTTTTATCTGTTGTTTGTGCGGTGAACGCTCTCTACTAGAGTCACTGGCTCACCTT<br/> CGGGTGGGCCCTTCTGCGTTTATATACTAGAGACCTGTAGGATCGTACAGGTTTACGCAAGAAAAATGGTTTGTTA<br/> TAGTCGAATAAACTAGAGT<b>CACACAGGAAAGT</b>ACTAG<b>ATG</b>ACAGTAAAGAAGCTTTATTTTCGTTCCAGCAG<br/> GTCGTTGTATGTTGGATCATTTCGCTGTTAATAGTACATTAACACCAGGAGAATTTAGACTTACCGGTTTGGT<br/> GTTATCTTTTGGAGACTGAAGAAGGACCTATTTTAGTAGATACAGGTATGCCAGAAAGTGCAGTTAATAATGAAG<br/> GTCCTTTTAAACGGTACATTTGTCGAAGGGCAGGTTTACCAGAAATGACTGAAGAAGATAGAATCGTGAATATTT<br/> TAAAACGGGTTGGTTATGAGCCGGAAGACCTTCTTTATATATTAGTTCTCACTTGCATTTTGTATCATGCAGGAG<br/> GAAATGGCGCTTTTATAAATACACCAATCATGTACAGCGTGTGAATATGAGCGCGCCAGCAAGAAAT<br/> ATTTGAAAGAATGTATATTGCCGAATTTAACTACAAAATCATTGAAGGTGATTATGAAGTCGTACCAGGAGTTC<br/> AATTATGCATACACAGGCCATATCCAGGCCATCAATCGCTATTAATTGAGACAGAAAAATCCGGTCTGTAT<br/> TATTAACGATGATGCATCGTATACGAAAGAGAATTTGAAAATGAAGTGCCATTTGCGGGATTTGATTCAGAAT<br/> TAGCTTTATCTTCAATTAACGTTTAAAGAAGTGGTGTATGAAGAAGCCGATTTGTTTCTTTGGACATGATA<br/> TAGAGCAGGAAAGGGATGTAAAGTGTTCCTGAAATATATA<b>TA</b>AATAACTAGAGCCAGGCATCAAATAAAAAAGCA<br/> AAGGCTCAGTCGAAAGACTGGGCCCTTTCGTTTTATCTGTTGTTTGTGCGGTGAACGCTCTCTACTAGAGTCACT<br/> GGCTCACCTTTCGGGTGGGCCCTTCTGCGTTATA</p> |
| <p>NY018A</p>                                      | <p>pT7-luxI*-T7 term</p>                           | <p>TAATACGACTCACTATAGGGGAATTTGTGAGCGGATAACAATTCGCCCTCTAGAAAATAATTTTGTTTAACTTTAAGA<br/> AGGAGATATACAT<b>ATG</b>ACTATAATGATAAAAAATCGGATTTTTTGGCAATTCATCGGAGGAGTATAAAGGTA<br/> TTCTAAGTCTTCGTTATCAAGTGTTTAAGCAAAGACTTGGGTGGGACTTAGTTGTTGAAAATAACCTTGAATCAG<br/> ATGAGTATGATAACTCAAATGCAGAAATATATTTATGCTTGTGATGATACTGGAAATGTAAGTGGATGCTGGCGTT<br/> TATTACCTACAACAGGTGATATATGCTGAAAAGTGTTCCTGAAATGCTTGGTCAACAGAGTCTCCCAAAG<br/> ATCCTAATATAGTCGAATTAAGTCGTTTTCGCTGTAGGTAAAAATAGCTCAAAGATAAATAACTCTGCTAGTGAAA<br/> TTACAATGAAACTATTTGAAGCTATATATAAACACGCTGTAGTCAAGGTATACAGAATATGTAACAGTAAACAT<br/> CAACAGCAATAGAGCGATTTTTAAAGCGTATTAAGTTCCTTGTCACTCGTATTGGAGACAAAAGAAATTCATGTAT<br/> TAGGTGATACTAAATCGGTTGATTTGCTATGCGCTATTAATGAACAGTTTAAAAAGCAGTCTTA<b>TAAG</b>CGGATC<br/> CGAATTCGAGCTCCGTCGACAAGCTTGGCGCGACTCGAGCACCACCACCACCACCCTGAGATCCGGCTGCTAA<br/> CAAAGCCCAGAAAGGAAGCTGAGTTGGCTGCTGCCACCGCTGAGCAATAACTAGCATAACCCCTTGGGGCTCTAA<br/> ACGGGCTTGGAGGGTTTTTTG</p>                                                                                                                                                                                                                                                                                                                                                                                                                                                                                                                                                                                                                                                                                                                                                                                                                                                                                                                                           |
| <p>NY019A</p>                                      | <p>pT7-RBS-E34G E63G luxI-T7 term</p>              | <p>TAATACGACTCACTATAGGGGAATTTGTGAGCGGATAACAATTCGCCCTCTAGAAAATAATTTTGTTTAACTTTAAGA<br/> AGGAGATATACAT<b>ATG</b>ACTATAATGATAAAAAATCGGATTTTTTGGCAATTCATCGGAGGAGTATAAAGGTA<br/> TTCTAAGTCTTCGTTATCAAGTGTTTAAGCAAAGACTTGGGTGGGACTTAGTTGTTGAAAATAACCTTGAATCAG<br/> ATGAGTATGATAACTCAAATGCAGAAATATATTTATGCTTGTGATGATACTGGAAATGTAAGTGGATGCTGGCGTT<br/> TATTACCTACAACAGGTGATATATGCTGAAAAGTGTTCCTGAAATGCTTGGTCAACAGAGTCTCCCAAAG<br/> ATCCTAATATAGTCGAATTAAGTCGTTTTCGCTGTAGGTAAAAATAGCTCAAAGATAAATAACTCTGCTAGTGAAA<br/> TTACAATGAAACTATTTGAAGCTATATATAAACACGCTGTAGTCAAGGTATACAGAATATGTAACAGTAAACAT<br/> CAACAGCAATAGAGCGATTTTTAAAGCGTATTAAGTTCCTTGTCACTCGTATTGGAGACAAAAGAAATTCATGTAT<br/> TAGGTGATACTAAATCGGTTGATTTGCTATGCGCTATTAATGAACAGTTTAAAAAGCAGTCTTA<b>TAAG</b>CGGATC<br/> CGAATTCGAGCTCCGTCGACAAGCTTGGCGCGACTCGAGCACCACCACCACCACCCTGAGATCCGGCTGCTAA<br/> CAAAGCCCAGAAAGGAAGCTGAGTTGGCTGCTGCCACCGCTGAGCAATAACTAGCATAACCCCTTGGGGCTCTAA<br/> ACGGGCTTGGAGGGTTTTTTG</p>                                                                                                                                                                                                                                                                                                                                                                                                                                                                                                                                                                                                                                                                                                                                                                                                                                                                                                                                           |
| <p>RL054K</p>                                      | <p>pT3-RBS-aHL-sfGFP</p>                           | <p>ATTAACCCCTCACTAAAGGGAGAATAATTTTGTTTAACTTTAAGAAGGAGAATAATCT<b>ATG</b>GATTCTGATATCA<br/> ATATCAAACCCGGCACCCGATATCGGCTCCAATACCACCGTTAAACCCGGTGTCTGGTGACCTATGATAAAG<br/> AAAACGGTATGCATAAAAAAGTGTTTACTCGTTTATTGACGATAAAAACCATACAAAAAACTGCTGGTCAATCC<br/> GCACCAAAGGCACCATTCGGGGTCAATACCGTGTGTACTCCGAAGAAGGTGCGAACAAGCGGCTGGCTTGGC<br/> CGTCTGCCTTTAAAGTGCAGCTGCAACTGCCGGATAATGAAGTGGCGCAGATTCAGATTTATATCCGCGTAATA<br/> GCATCGATACCAAAGAAATATATGAGTACCCTGACCTATGGTTTTAATGGCAATGTTACCGGTGATCGATACGGGTA<br/> AAATTTGGCGGCTGATTGGCGCAATGTGTCCATTGGTCAACGCTGAAATACGTGCAACCGGATTTCAAACCA<br/> TTCTGGAAAGTCCGACCGATAAAAAAGTGGGTTGGAAAGTATCTCAACACATGGTGAATCAGAATCGGGGTC<br/> CGTACGATCGGATTCCTGGAAATCCGGTTTATGGCAATCAGCTGTTTATGAAAACCCGCAACCGGTAGTATGAAAG<br/> CGGCGGATAATTTTCTGGACCCGAACAAGCCTCAAGCCTGCTGTCCAGCGGTTTTTACCGCGATTTTGCACGG<br/> TTATTACCATGGATCGCAAAGCCAGCAAACAGCAGACCAACATTGATGTGATCTACGACGTGTGCGTGTATGAT<br/> ATCAACTGCATTTGGACCTCAACCAATTTGAAAGGCACCAATACCAAAGATAAATGGACGGATCGCAGTTCAGAAC<br/> GCTACAAAATGATTGGGAAAAAGAAATGACCAACGgatccggcagcggttc<b>ATG</b>CGTAAAGGCGAAGAGC<br/> TGTTCACTGGTGTGCTCCCTATTTCTGGTGAACCTGGATGGTGTATGTCACCGTGAAGTTTCTGCGTGGCGG<br/> AGGGTGAAGGTGACGCAACTAATGGTAACTGACGCTGAAGTTCATCTGTACTACTGGTAACTGCCGGTACCTT<br/> GGCCGACTCTGGTAAACGACGCTGACTTATGGTGTTCAGTGTCTTGTCTGTTATCCGGACCATATGAAGCAGCATG<br/> ACTTCTCAAGTCCGCCATGCCGGAAGGCTATGTGACGGAACGCACGATTTCCCTTAAAGGATGACGGCACGTTACA<br/> AAACCGGTGCGGAAGTGAATTTGAAGGCATACCTGGTAAACCGCATTTAGCTGAAAGGATGACTTTAAAG<br/> AAGACGGCAATATCTGGGCCATAAGCTGGAATACAAATTTAAACGCCACAAATGTTTACATCACCCGCGATAAAC<br/> AAAAAATGGCATTAAGCGAATTTAAAAATCGCCACAACGTTGGAGGATGGCAGCGTGCAGCTGGCTGATCACT<br/> ACCAGCAAAACACTCCAATCGGTGATGGTCTGTTCTGCTGCCAGACAATCACTATCTGAGCAGCGAAAGCGTTC<br/> TGTCTAAAGATCCGAACGAGAAACGGATCATATGTTTCTGCTGGAGTTCTGTAAACCGCAGCGGCATCACGCATG</p>                                                                   |

|        |                                                                      |                                                                                                                                                                                                                                                                                                                                                                                                                                                                                                                                                                                                                                                                                                                                                                                                                                                                                                                                                                                                                                                                                                                                                                                                                                                                                                                                                                                                                                                                                                                                                                                                                                                                                                                                                                                                                                                                                                                                                                                                                                                                                                                                                                                                                                                                                                                                                                                                                                                                                                                                                                                                                                                                                                                                                                                                                                                                                                                                                                                                                                                                                                                                                                                                                                                               |
|--------|----------------------------------------------------------------------|---------------------------------------------------------------------------------------------------------------------------------------------------------------------------------------------------------------------------------------------------------------------------------------------------------------------------------------------------------------------------------------------------------------------------------------------------------------------------------------------------------------------------------------------------------------------------------------------------------------------------------------------------------------------------------------------------------------------------------------------------------------------------------------------------------------------------------------------------------------------------------------------------------------------------------------------------------------------------------------------------------------------------------------------------------------------------------------------------------------------------------------------------------------------------------------------------------------------------------------------------------------------------------------------------------------------------------------------------------------------------------------------------------------------------------------------------------------------------------------------------------------------------------------------------------------------------------------------------------------------------------------------------------------------------------------------------------------------------------------------------------------------------------------------------------------------------------------------------------------------------------------------------------------------------------------------------------------------------------------------------------------------------------------------------------------------------------------------------------------------------------------------------------------------------------------------------------------------------------------------------------------------------------------------------------------------------------------------------------------------------------------------------------------------------------------------------------------------------------------------------------------------------------------------------------------------------------------------------------------------------------------------------------------------------------------------------------------------------------------------------------------------------------------------------------------------------------------------------------------------------------------------------------------------------------------------------------------------------------------------------------------------------------------------------------------------------------------------------------------------------------------------------------------------------------------------------------------------------------------------------------------|
|        |                                                                      | GTATGGATGAACTGTACAAA <b>TAA</b> ACTAGTCTGCAGTCCGGCAAAAAAGGGCAAGGTGTACCACCCCTGCCCTTTTCTTTTAAAACCGAAAAGATTACTTCGCGT                                                                                                                                                                                                                                                                                                                                                                                                                                                                                                                                                                                                                                                                                                                                                                                                                                                                                                                                                                                                                                                                                                                                                                                                                                                                                                                                                                                                                                                                                                                                                                                                                                                                                                                                                                                                                                                                                                                                                                                                                                                                                                                                                                                                                                                                                                                                                                                                                                                                                                                                                                                                                                                                                                                                                                                                                                                                                                                                                                                                                                                                                                                                             |
| RL059K | pT3-<br>lsr<br>intergenic<br>region<br>-aHL-<br>sfGFP                | ATTAACCCCTCACTAAAGGGAGa <b>AATTCATTCTTCACTTTGAACATATTTAAATCTTTAATGCAATTGTTTCAGTTC TTGCTCATTTATATCTGTGATGGCAACCACAGTTTACTCTACGAGCATGAACAAACCGCAACCGTGAATAACAA ATAGCATAAATTGTGATCTATTCTGTCGAAATATGTGCAATGTCCACCTAAGGTTATGAACAAATTTAAAGCAGA AATACATTTGTTTCAAACTCACCTGCAAACTGAACGGGGGAAAT</b> ACTAGA <b>ATG</b> GATTCTGTATCAATATCAAA ACCGGCACCACCGATATCGGCTCCAATACCACCGTTAAAAACCGGTGATCTGGTGACCTATGATAAAGAAAACGGT ATGCATAAAAAAGTGTCTTACTCGTTTATTGACGATAAAAAACCATAACAAAAAATGCTGGTCAATCCGCACCAAA GGCACCATTTGCGGGTCAATACCGTGTGTACTCCGAAGAAGGTGCGAACAAAAGCGGTCTGGCTTGGCCGTCTGCC TTTAAAGTGCAGCTGCAACTGCCGGATAATGAAGTGGCGCAGATTTCAGATTATTTACCGGTAATAGCATCGAT ACCAAAGAATATATGAGTACCTGACCTATGGTTTTAATGGCAATGTTACCGGTGATGATACGGGTAATAATTTGGC GGTCTGATTGGCGCCAATGTGTCCATTTGGTTCATACGCTGAAATACGTCGCAACCGGATTTCAAACCATCTGGAA AGTCCGACCGATAAAAAAGTGGGTTGGAAAGTTATCTTCAACAACATGGTGAATCAGAAGCTGGGGTCCGTACGAT CGCGATTCTTGAATCCGGTTTATGGCAATCAGCTGTTTATGAAAACCCGCAACGGTAGTATGAAAGCGGGGAT AATTTTCTGGACCGCAAAAGCCCTCAAGCCTGCTGTCCAGCGGTTTTAGCCCGGATTTTCCACGGTTATTTACC ATGGATCGCAAAGCCAGCAAAACAGCAGACCAACATTTGATGTGATCTACGAACGCTGTGCGTGTGATGATTATCACTG CATTGGACCTCAACCAATTGGAAAGGCACCAATACCAAAAGATAAATGGACGGATCCGAGTTCCAGAACGCTACAAA ATTGATTGGGAAAAAGAAGAAATGACCAACGgatccggcagcggttct <b>ATG</b> CGTAAAGGCGAAGAGCTGTTCACT GGTGTCTCCCTATTCTGGTGGAACTGGATGGTGTGTCACCGGTATAAGTTTTCCGTGCGTGGCGAGGGTGAA GGTGACGCAACTAATGGTAAACTGACGCTGAAGTTCATCTGTACTACTGGTAAACTGCCGGTACCTTGGCCGACT CTGGTAAACGACGCTGACTTATGGTGTTCAGTGTCTTGGCTGTTATCCGGACCATATGAAGCAGCATGACTTCTTC AAGTCCGCCATGCCGAAGGCTATGTGCAGGAACGCAGATTTCCTTTAAGGATGACGGCACGTACAAAACCGGT GCGGAAGTGAATTTGAAGGGGATACCTGGTAAACCGCATTTGAGCTGAAAGGCATTGACTTTAAAGAAGACGGC AATATCTTGGGCCATAAGCTGGAATACAATTTAACAGCCACAATGTTTACATCACCGCCGATAAACAACAAAAAT GGCATTAAGCGCAATTTAAAATTCGCCACAACGTTGGAGGATGGCAGCTGACGCTGATCTACACGCAAA AACACTCCAATCGGTGATGGTCTGTTCTGCTGCCAGACAATCATACTGAGCAGCAAAAGCGTTCTGTCTAAA GATCCGAACGAGAAACGCGATCATATGGTTCTGCTGGAGTTCGTAAACCGCAGCGGCATCACGCATGGTATGGAT GAACTGTACAAA <b>TAA</b> ACTAGTCTGCAGTCCGGCAAAAAAGGGCAAGGTGTACCACCCCTGCCCTTTTTCTTTAAA ACCGAAAAGATTACTTCGCGT                                                                                                                                                                                                                                                                                                                                                                                                                                                                                                                                                                                                                                                                                                                                                                                                                                                                                                                                                                                                                                                                                                                                                    |
| RL060K | pT7-<br>RBS-<br>lsrR-<br>RBS-<br>lsrK-<br>RBS-T3<br>RNAP-<br>T7 term | TAATACGACTCACTATAGGGGAATTGTGAGCGGATAACAATTCCCTCTAGAAAATATTTTGTTTAACTTTAAGA A <b>GGAG</b> ATATACC <b>ATG</b> GCAATCAACGATTTCGGCAATTTTCAGAACAGGGAATGTGTGAAGAAGAACAGGTCCGCGG GATCGCGTGGTTTTACTATCACGACGGGCTGACCCAGAGCGAGATCAGCGATCGTCTCGGCTGACACGTTTGAA AGTGTCCGATTTGCTGGAGAAAGGGCATCAGTCCGGCATTATTCCGGTACAGATTAACTTCGCTTTGAAGGCTG TCTGGAATATGAACTCAATTACGTCGTGAGTTTTCGCTGCAACATGTCGGGTGATCCCTGGGCTTGGCGATGC TGATGTCCGGTGGCGACTGGGGATAGCGCGCGCATATGTTGATGAGTTTACTTCAACCAACAGATGCTGGC GATTGGTTTTGGCGAGGCAACCATGAATACGCTGCAACGCTTAAGTGGTTTTATTTCTGTCACAGCAAATTCGCC TGGTACGCTCTCCGGTGGCGTCCGGTCTTATATGACGGGAATCGGGCAGCTTAACCGCGGCTGCAGTGTGAATAT TATTCGGCTCCGTTGCGGGCATCCCGCTGACATTGCCGTACGCTAAAAAATGAAAATGCGTCAAAGATGT TCTGTAGCCCGCAAGCAGCGGATGTGGCGATTGCGGCATTGGTGTGATGATCAACAGCAGATGGGCTGCAAT CATTCCGCTCCGTTATATCAGCCAGGGCGAACAGTTAATGATTGGCCGAAAAGGGCGGTTGGCGACATTTTAGG CTACTTTTTTATGCAAAAGGTGACGTTGTACGAATATCAAAATACATAACGAACCTGATTGGCTTACCTTTAAG CGCGCTGAAGACCATAACCGTCCGGTTGGCGTGGCAGGGGGAGAAAATAAAGCCGAAGCAATGGCCGCTGCAAT GAAAGCGGTTATATCAACGCACTGGTACCAGTACAGCACAGCAGCGGGGATTTTACGTAGT <b>TAA</b> GCTAGCTG TTTAACTTTAAGA <b>AGG</b> AGATATACC <b>ATG</b> GCTCGACTCTTTACCCTTTCAGAATCAAAGTACTACCTGATGGCGC TGGATGCAGGCACCGGAAGTATTCGGGCTGTGATATTCGACCTGGAAGGCAATCAAATAGCAGTGGGACAGGCGG AGTGGCGGCATCTGGCAGTACCGGACGTTCTCGTTCTATGGAATTTGATCTCAACAAAAACTGGCAACTGGCGT GTGAGTGTATGCCCAGGCGCTGCACAACCGCCGATAGCCCCGAGTATATCGCTCCGCTTTCGGCATGTTTCGA TGCGTGAAGGCATTTGTTTTATATAAATGAAGAGGACCCCGCATCTGGGCTGCGCAATGTGGATGCCAGGCGG CACGCGAAGTTAGCGAACTTAAAGAACTGCACAACAATACCTTTGAAAACGAAGTTTATCGCGCAGCCGGACAAA CACTGGCTTTAAGTGCCATCCCAAGATTACTTTGGCTGGCGCACCATCGTTCCGATATTTACCGTCAAGGCATCAA CCATCACCATGATCAGCGACTGGCTGGCCTATATGCTCAGCGCGAACTGGCGGTGGATCCCTCTAACGCTGGCA CCACGGGACTTCTTGATCTAACCAACCGTGTACTGGAAACCTGCATTGCTGGATATGGCTGGCCTAGCTGGCGATA TTCTTTCTCCTGTCAAAGAAACCGGCACATTTGCTGGGCGTGGTAAGTTCACAAGCGGGGAACTCTGGGCTGTA AGGCGGGCCTCCGGTGGTCTGTTGGAGGAGCGCAGCTGCAGCTTGGTTCGCTTGGGTAGCGGTTGTGCTCCGG CACAAACCGCGGTTCTTGGCGGCACATTTGGCAGCAAGTTGAAATTTAGCCCGCGCGGTGACAGACCCAGAAA TGAACGTGCGGTTAATCCTCATGTTATTCCTGGCATGGTACAAGCTGAATCTATAAGCTTTTTACCGGACTCA CCATGCGCTGGTTCGCGATGCTTTCTGTGCCGAAGAAAACCTGATTGCCGAACGTTTAGGCATCGACACCTATA CGCTGCTGGAAGAGATGGCCAGTCCGGTGGCGCCTGGGTCGTTGGGCGTAATGCCGATCTCTCCGACAGAAATGC GCTTTAAAACCTGGTATCACGCTGCGCCTTCTTTAATACTTGTCCATTGACCCGATAAATGTAACAAAGCGA CATTTGTTCCGTCCGCTGGAAGAAAATGCGGGCAGTTGATATCAGCGTGAATCTGCAACAAATGCTGATTTCTCGA ATATTCATCCTTCATCGTTAGTCTTTGCGAGCGGAGGTTCAAAGGGAAATTTAGGAGTCAAATTTCTCGCTGATG TCTCGGATTAACCGTCAATATTCGGTGGTCAAAGAAGCCACTGCATTAGGATGTGCCATTGCAGCTGGCGTGC GTGCCGAATTTTTTATCAATGGCAGAAACCGGAGAACCGCTGGTTCGCTGGGAACGGACGCACACACAGACC CGGAAAAGCATGAACCTTTATCAGGATTCACCGGATAAGTGGCAGGAGTTATGCAAGCTGAGGCTGGGCTGGGTTG ATCATGGACTGACGAGCTGTTATGAAAAGCGCCTGGGTT <b>TAA</b> AGCTCTTTAAACGAATTCGTTA <b>AGG</b> AGAA TAATCT <b>ATG</b> AACATCATCGAAAACATCGAAAAGAAATGACTTCTCAGAAAATCGAACTGGCTGTATCCCGTTCAAC ACACTGGCTGACCACTACGGAAGCGCCTGGCTAAAAGAGCAGTTGGCTTTAGAACATGAGTCTTATGAGCTAGGC GAGCGCGCTTCTCAAGATGCTTGAGCGTCAAGCGAAAGCTGGTGGATGCAAGCAACGACGCGCTAAGCCG TACTCGCTACGCTTCTCCCTAAGTTAAACCAACGATTCGTCGAGTGGCTCGAAGAGTACGCATCGAAGAAAGGC CGCAAGCCTAGCGCATACGCACCGCTCCAGTTACTCAAGCGGAGGCTCCGCTTTATCACCTGAAAGTTATC |

|        |                                                                                                          |                                                                                                                                                                                                                                                                                                                                                                                                                                                                                                                                                                                                                                                                                                                                                                                                                                                                                                                                                                                                                                                                                                                                                                                                                                                                                                                                                                                                                                                                                                                                                                                                                                                                                                                                                                                                                                                                                                                                                                                                                                                                                                                                                                                                                                                                                                                                                                                                                                                                                                                                                                                                                                                                                     |
|--------|----------------------------------------------------------------------------------------------------------|-------------------------------------------------------------------------------------------------------------------------------------------------------------------------------------------------------------------------------------------------------------------------------------------------------------------------------------------------------------------------------------------------------------------------------------------------------------------------------------------------------------------------------------------------------------------------------------------------------------------------------------------------------------------------------------------------------------------------------------------------------------------------------------------------------------------------------------------------------------------------------------------------------------------------------------------------------------------------------------------------------------------------------------------------------------------------------------------------------------------------------------------------------------------------------------------------------------------------------------------------------------------------------------------------------------------------------------------------------------------------------------------------------------------------------------------------------------------------------------------------------------------------------------------------------------------------------------------------------------------------------------------------------------------------------------------------------------------------------------------------------------------------------------------------------------------------------------------------------------------------------------------------------------------------------------------------------------------------------------------------------------------------------------------------------------------------------------------------------------------------------------------------------------------------------------------------------------------------------------------------------------------------------------------------------------------------------------------------------------------------------------------------------------------------------------------------------------------------------------------------------------------------------------------------------------------------------------------------------------------------------------------------------------------------------------|
|        |                                                                                                          | <p>CTTGGCTCACTAACCAGTACGAACATGACAACCATTTCAGGCGCGTCTGGTATGTCTGGGGAAAGCCATTGAGGAC<br/> GAGGCACGATTTGGGCGCATCCGTGACCTAGAAGCGAAGCACTTCAAGAAGCAGCTTGGAGAACAGCTTAAACAAG<br/> CGCCACGGGCAAGTCTACAAGAAAGCATTATGTCAGGTGGTTCGAGGCGGATATGATTTGGTTCGAGGCTGGCTTGGT<br/> GGCGAGGCGTGGTCTAGCTGGGATAAAGAAACCACGATGCACGTAGGGATTTCGCCTGATTGAAATGCTGATTGAA<br/> TCCACGGGTCTGGTGAATTACAGCGCCACAACGCAGGTAACGCAGGCTCTGACCATGAGGCACTGCAACTGGCC<br/> CAAGAGTACGTGGACGATATTAGCGAAGCGTGCAGGCGCTCTGGCGGGTATCTCTCCGATGTTCCAGCCGTGTGTC<br/> GTACCGCCGAAACCTTGGGTAGCAATCACAGGGGGCGGCTATTGGGCTAACGGTCCGACAGCTTTGGCACTCGTT<br/> CGCACTCACTTAAGAAGGGCTTGATGCGCTACGAAGACGTTTACATGCCAGAAGTCTACAAGGCTGTGAACCTC<br/> GCGCAAACACCCGATGAAATCAACAAGAAAGTCTTGTCTGTTCAATGAGATTGTTAACTGGAAGAATTGC<br/> CCGGTAGCAGACATCCATCGCTGGAGCGCAAGAGTTACCGCCTAAGCCTGACGACATTGACACCAACGAGGCA<br/> GGCTCAAGGAGTGAAGAAAGCCGCTGCTGGTATCTATCGCTTGGACAAGGCAGAGTCTCGCCGTATCAGC<br/> TTAGAGTTTATGCTGGAGCAGGCAACAAGTTTCGCAAGTAAGAAGCAATCTGGTCCCTTACAACATGGACTGG<br/> CGCGGTCTGTGTACGCTGTGCCGATGTTCAACCCGCAAGGCAACGACATGACGAAAGGCTGCTGACCCCTGCT<br/> AAAGGCAAGCCAATCGGTGAGGAAGGTTTCTACTGGCTGAAAATCCACGGTGCAGACTGTGCGGGTGTGATAAG<br/> GTTCCATTCCCGGAGCGCATCGGTTTATTGAGAAGCAGTAGACGACATTCTGGCTGCGCTAAAGACCCAATC<br/> AATAACACTTGGTGGCTGAGCAGGATTCACCGTTCTGTTTCTCGCTTTTGTCTGCGGCTGAGGCTGATGAG<br/> CACCACGGTCTGAGCTACAATTGCTCTCTGCCGCTGGCGTTCGACGGGCTTGGCTGCTGATCCAGCACTTCTCC<br/> CGGATGCTCCCGATGAGGTAGGCGGCTGTCGGTTAACCTGCTGCCAAGCGAAACCGTGCAGGACATTTACGGC<br/> ATCGTTGCACAGAAAGTAAACGAGATTCTCAAACAGGATGCAATCAACGGCACGCTAACGAGATGATTACCGTG<br/> ACCGACAAGGACACCGGGGAAATCTCAGAGAAGCTCAAACCTGGAACCTCAACCGTGGCGATGAGTGGCGCA<br/> TATGGTGTAAACCGTAGCGTAACTAAACGTTCCGGTATGACGCTGGCTTACGGTCCAAGGAGTTCGGCTTTCGT<br/> CAACAGGTATGGATGACACCATTACGCTGCAATGACAGCGGTAAAGGGCTGATGTTCAACCAACCGAACCA<br/> CGCGCTGGCTATATGGCTAAGCTGATTTGGGATGCGGTAAAGCGTACCGTAGTTGACAGCGGTTGAGGCGATGAAC<br/> TGGCTCAAATCTGCCCTAAGCTGCTGGCTGCTGAGGTCAAGGACAAGAAGGATTTGCGCCACCGT<br/> TGCGCGGTTCACTGGACTACGCCGGACGGCTTCCCGTCTGGCAGGAATACCGCAAGCCACTCCAGAAGCGTCTC<br/> GATATGATTTCTTAGGGCAATTCCGCTCTGCAACCGACGATTAATACCCTCAAGGATTACAGCATGACGCACAC<br/> AAGCAGGAGTCTGGCATCGCTCCTAATTTGTTCACTCACAGGACGGTAGCCACCTCCGCATGACAGTCTGTTAT<br/> GCTCACGAGAAGTATGGCATGAGTCTCTTTGCGCTCATCCATGACAGCTTTGGGACTATCCCGGACAGCGTGGT<br/> AAGCTCTTTAAGGCTGTGCGTGAACGATGGTTATCACCTATGAGAACAACGATGTGCTGGCAGACTTCTACTCT<br/> CAGTTTGCCGACAGCTACACGAGACCCAACCTGGACAAGATGCCTCCGCTCCGAAGAAAGGAAACCTGAACCTG<br/> CAAGACATTTCAAGTCTGACTTTGGCTTTGCA<b>TAA</b>CTCGAGCACCACCACCACCACCCTGAGATCCGGCTGCT<br/> AACAAAGCCGAAAGGAGCTGAGTTGGCTGCTGCCACCGCTGAGCAATAACTAGCATAAACCCCTTGGGGCTCT<br/> AAACGGTCTTGAGGGGTTTTTTG</p> |
| RL076A | pT7-<br>RBS-<br>CRP-T7<br>term                                                                           | <p>TAATACGACTCACTATAGGGGAATTGTGAGCGGATAACAATTCCTCTAGAAATAATTTTGTAACTTTAAGA<br/> AGGAGATATACAT<b>ATG</b>GTGCTTGGCAAACCGCAACAGACCCGACTCTCGAATGGTCTTGTCTCATTGCCACA<br/> TTCATAAGTACCCATCCAAGAGCAGCTTATTCACCAGGGTGAAAAGCGGAAACCGTGTACTACATCGTTAAAG<br/> GCTCTGTGGCAGTGTGATCAAGACGAGAGGTTAAAGAATGATCTCTCTGATTAAGTACAGGTTGATTTTA<br/> TTGGGAACTGGGCTGTTTGAAGAGGGCCAGGAACGTAGCGCATGGGTACGTGCCGAAACCGCTGTGAAGTGG<br/> CTGAAATTTCTGACAAAAATTTCCGAATTGATTAGGTAACCCGGACATTCTGATGCGTTTGTCTGCACAGA<br/> TGGCGCGTCTGCAAGTCACTTCAGAGAAAGTGGGCAACCTGGCGTTCCTCGAGTGCAGGGCCGATTGAC<br/> AGACTCTGCTGAATCTGGCAAACAACAGCCTATGACTACCCGGACGGTATGCAATCAAAATACCAGTCT<br/> AGGAATTTGGTACAGATTGTCGCTGTTCTCGTGAACCGTGGGACCATTTCTGAAGATCGGAACCAAC<br/> TGATCTCCGCACACGGTAAACCATCGTCTTTACGGCACTCGT<b>TAA</b>GCGGATCCGAATTCGAGCTCCGTCGACA<br/> AGCTTGCAGGCGACTCGAGCACCACCACCACCCTGAGATCCGGCTGTAACAAGCCGAAAGGAGCTGA<br/> GTTGGCTGCTGCCACCGCTGAGCAATAACTAGCATAAACCCCTTGGGGCTCTAACCGGTCTTGAGGGTTTTTT<br/> G</p>                                                                                                                                                                                                                                                                                                                                                                                                                                                                                                                                                                                                                                                                                                                                                                                                                                                                                                                                                                                                                                                                                                                                                                                                                                                                                                                                                                                                                                                                                                                                                                                                                                                                                                       |
| RL078A | pTET-<br>BBa_<br>B0034-<br>luxR-<br>BBa_<br>B0015-<br>pluxR-<br>BBa_<br>B0032-<br>luxI-<br>BBa_<br>B0015 | <p>TCCCTATCAGTGATAGAGATTGACATCCCTATCAGTGATAGAGATACTGAGCACTACTAGAGAAAAGGAGAAAT<br/> ACTAG<b>ATG</b>AAAAACATAAATGCCGACGACATACAGAATAATTAATAAAATTAAGCTTGTAGAAGCAATAATG<br/> ATATTAATCAATGCTTATCTGATATGACTAAAAAGGTACATTTGTGAATATATTTACTCGCGATCATTTATCCTC<br/> ATTCTATGGTTAAATCTGATATTTCAATCCTAGATAATTACCTAAAAAATGGAGGCAATATATGATGACGCTA<br/> ATTTAATAAAATATGATCCTATAGTAGATTATTCTAACTCCAATCATTACCAATTAATTTGGAATATATTTGAAA<br/> ACAATGCTGTAAATAAAAAATCTCCAATGTAATTAAGAAGCGAAAACATCAGGCTTATCACTGGGTTTGTGTT<br/> TCCCTATTATACGGCTAACAAATGGCTTCCGAATGCTTAGTTTGGCATTTCAGAAAAAGACAACATATATAGATA<br/> GTTTATTTTTACATGCGTGTATGAACATACCATAATTGTTCTTCTCTAGTTGATAATTTACGAAAAATAAATA<br/> TAGCAAATAATAAATCAAACAACGATTTAACCAAAAAGAGAAAAAGAAATGTTTAGCGTGGGATGCCAAGGAAAA<br/> GCTCTGGGATATTTCAAAATATTAGGTTGCAGTGAAGCTACTGTCACTTCCATTAAACCAATGCGCAATGA<br/> AACTCAATACAACAACCGCTGCCAAGTATTTCTAAAGCAATTTAACAGGAGCAATTTGATTTGCCCATACTTTA<br/> AAAAT<b>TAA</b>TAAACACTGATAGTGTAGTACTACTAGAGCAGGCATCAATAAAAACGAAAGGCTCAGTC<br/> GAAAGACTGGGCTTTCTGTTTATCTGTTGTTTGTGCGGTGAACGCTCTCTACTAGAGTCACTGCTCACCCTC<br/> GGGTGGGCTTTCTGCGTTTATATACTAGAGACCTGTAGGATCGTACAGGTTTACGCAAGAAATGGTTTGTAT<br/> AGTCCAATAAATACTAGAGTCAACAGGAAAGTACTAG<b>ATG</b>ACTATAATGATAAAAAATCCGATTTTTTGGCAA<br/> TTCATCCGAGGAGTATAAAGGATTTCAAGTCTTCTGTTATCAAGTGTAAAGCAAGACTTGTGTTGGACTTAG<br/> TTGTAGAAAAAATACCTTGAATCAGATGAGTATGATAAATCAACTCAAAATGCAGAAATATTTATGCTTGTGATGATC<br/> AAAATGTAAGTGGATGCTGGGCTTTATTACCTACAACAGGTGATTATATGCTGAAAAGTGTTTTTCTGAATTGC<br/> TTGGTCAACAGAGTGTCCCAAGATCCTAATATAGTCAATTAAGTCTGTTTGTGTTAGTAAAAATAGCTCAA<br/> AGATAAATAACTCTGCTAGTGAATTAACAATGAACTATTTGAAGCTATATAAACACCGCTTCTTAGTCAAGGTA<br/> TTACAGAATAATGTAACAGTAACATCAACAGCAATAGAGCGATTTTTAAAGCGTATTTAAAGCTTCTTGTGATCGTA<br/> TTGGAGACAAAGAAATTCATGTATTAGGTGATACTAAATCGGTTGTATTGTCTATGCCTATTAATGAACAGTTTA<br/> AAAAAGCAGTCTAAAT<b>TAA</b>TAACTAGAGCAGGCATCAATAAAAACGAAAGGCTCAGTCAAGACTGGGCC</p>                                                                                                                                                                                                                                                                                                                                                                                                                                                                                                                                                                                                                                                                                                                                                         |

|        |                                                                                                                |                                                                                                                                                                                                                                                                                                                                                                                                                                                                                                                                                                                                                                                                                                                                                                                                                                                                                                                                                                                                                                                                                                                                                                                                                                                                                                                                                                                                                                                                                                                                                                                                                                                                                                                                                                                                                                                                                                                                                                                                                        |
|--------|----------------------------------------------------------------------------------------------------------------|------------------------------------------------------------------------------------------------------------------------------------------------------------------------------------------------------------------------------------------------------------------------------------------------------------------------------------------------------------------------------------------------------------------------------------------------------------------------------------------------------------------------------------------------------------------------------------------------------------------------------------------------------------------------------------------------------------------------------------------------------------------------------------------------------------------------------------------------------------------------------------------------------------------------------------------------------------------------------------------------------------------------------------------------------------------------------------------------------------------------------------------------------------------------------------------------------------------------------------------------------------------------------------------------------------------------------------------------------------------------------------------------------------------------------------------------------------------------------------------------------------------------------------------------------------------------------------------------------------------------------------------------------------------------------------------------------------------------------------------------------------------------------------------------------------------------------------------------------------------------------------------------------------------------------------------------------------------------------------------------------------------------|
|        |                                                                                                                | TTCGTTTTATCTGTTGTTGTCGGTGACGCTCTCTACTAGAGTCACACTGGCTCACCTTCGGGTGGCCCTTC TCGGTTTATA                                                                                                                                                                                                                                                                                                                                                                                                                                                                                                                                                                                                                                                                                                                                                                                                                                                                                                                                                                                                                                                                                                                                                                                                                                                                                                                                                                                                                                                                                                                                                                                                                                                                                                                                                                                                                                                                                                                                     |
| RL079A | pTET-<br>BBa_<br>B0034-<br>luxR-<br>BBa_<br>B0015-<br>pluxR-<br>BBa_<br>B0032-<br>lasI-<br>BBa_<br>B0015       | TCCCTATCAGTGATAGAGATTGACATCCCTATCAGTGATAGAGATACTGAGCACTACTAGAGAAAGAGGAGAAAT<br>ACTAG <b>ATG</b> AAAAACATAAAATGCCGACGACACATACAGAATAATTAATAAAAATAAAGCTTGTAGAAGCAATAATG<br>ATATTAATCAATGCTTATCTGATATGACTAAAATGGTACATTGTGAATATATTTACTCGCGATCATTTATCCTC<br>ATTCTATGGTTAAATCTGATATTTCAATCCTAGATAAATTACCCTAAAAATGGAGGCAATATATGATGACGCTA<br>ATTTAATAAAAATATGATCCTATAGTAGATTATCTAACTCCAATCATTCCCAATTAATTGGAATATATTTGAAA<br>ACAATGCTGTAATAAAAAATCTCCAAATGTAATTAAGAAGCGAAAAACATCAGGCTTTACTCGGTTAGTT<br>TCCCTATTCATACGGCTAACAAATGGCTTCGGAATGCTTAGTTTTGCACATTCAGAAAAAGACAACATATAGATA<br>GTTTATTTTTACATGCGGTGATGAACATACCATTAATTGTTCCTTCTCTAGTTGATAAATTATCGAAAAATAATA<br>TAGCAAAATAAAATCAAACAACGATTTAACCAAAAAGAGAAAAAGAAATGTTTAGCGTGGGCATGCCAAGGAAAA<br>GCTCTTGGGATATTTCAAAAATATTAGGTTGCAGTGAGCGTACTGTCACCTTCCATTTAACCAATGCCGAAATGA<br>AACTCAATACAACAACCGCTGCCAAAGTATTTCTAAAGCAATTTAACAGGAGCAATTGATTGCCCATACTTTA<br>AAAA <b>TAA</b> AACACTGATAGTGCTAGTGTAGATCACTACTAGAGCCAGGCATCAAATAAAACGAAAGGCTCAGTC<br>GAAAGACTGGGCCTTTCGTTTTATCTGTTGTTGTGCGGTGACGCTCTCTACTAGAGTCACACTGGCTCACCTTC<br>GGGTGGCCCTTCTGCGTTTATATACTAGAGACCTGTAGGATCGTACAGGTTTACGCAAGAAAATGGTTTTGTAT<br>AGTCGAATAAAATACTAGAGTCACACAGGAAAGTACTAG <b>ATG</b> ATCGTTTTCAGATCGGTCGTCGTTGAAGAGTTCGACA<br>AAAACTGCTGGGTGAAATGCACAACTGCGTGCTCAGGTTTTCAAGAAGCTAAAGGTTGGGACGTTCCCGTAA<br>TCGACGAAATGGAAATCGACGGTTACGACGCTCTGTCCTCCGCTACTACATGCTGATCCAGGAAGACACCCCGGAG<br>CTCAGGTTTTCGGTTGCTGGGCTATCTTCGACACCACCGGTCCTGATGCTGAAAAACACTTCCCGGAAATGC<br>TGCACGGTAAAGAAGCTCCGTGCTCCCGCACATCTGGGAATGTCCTCCGTTTCGCTATCACTCCGGTCAGAAAG<br>GTTCCCTGGGTTTCTCGACTGCACCTGGAAGCTATGCGTGCTCTGGCTCGTTACTCCTTGCAGAACGACATCC<br>AGACCTGGTTACCGTTACCACCGTTGGTGTGAAAAAATGATGATCCGTCGCTGGTCTGGACGTTTCCCGTTTCG<br>GTCCGCACCTGAAATCGGTATCGAACGTCGTTGCTCTGCGTATCGAAGTGAACGCAATTAACCCAGATCGCTC<br>TGTACGGTGGTTCGTTGTTGAACGCGTCTGGCTGTTTT <b>TAA</b> AATAACTAGAGCCAGGCATCAAATAAAACGAA<br>AAGGCTCAGTCGAAAGACTGGGCCTTTCGTTTTATCTGTTGTTGTGCGGTGACGCTCTCTACTAGAGTCACACT<br>GGCTCACCTTCGGGTGGCCCTTCTGCGTTTATA |
| RL080A | pTet-<br>BBa_<br>B0034-<br>luxR-<br>BBa_<br>B0015-<br>pluxR-<br>BBa_<br>B0032-<br>rhII-<br>BBa_<br>B0015       | TCCCTATCAGTGATAGAGATTGACATCCCTATCAGTGATAGAGATACTGAGCACTACTAGAGAAAGAGGAGAAAT<br>ACTAG <b>ATG</b> AAAAACATAAAATGCCGACGACACATACAGAATAATTAATAAAAATAAAGCTTGTAGAAGCAATAATG<br>ATATTAATCAATGCTTATCTGATATGACTAAAATGGTACATTGTGAATATATTTACTCGCGATCATTTATCCTC<br>ATTCTATGGTTAAATCTGATATTTCAATCCTAGATAAATTACCCTAAAAATGGAGGCAATATATGATGACGCTA<br>ATTTAATAAAAATATGATCCTATAGTAGATTATCTAACTCCAATCATTCCCAATTAATTGGAATATATTTGAAA<br>ACAATGCTGTAATAAAAAATCTCCAAATGTAATTAAGAAGCGAAAAACATCAGGCTTTACTCGGTTAGTT<br>TCCCTATTCATACGGCTAACAAATGGCTTCGGAATGCTTAGTTTTGCACATTCAGAAAAAGACAACATATAGATA<br>GTTTATTTTTACATGCGGTGATGAACATACCATTAATTGTTCCTTCTCTAGTTGATAAATTATCGAAAAATAATA<br>TAGCAAAATAAAATCAAACAACGATTTAACCAAAAAGAGAAAAAGAAATGTTTAGCGTGGGCATGCCAAGGAAAA<br>GCTCTTGGGATATTTCAAAAATATTAGGTTGCAGTGAGCGTACTGTCACCTTCCATTTAACCAATGCCGAAATGA<br>AACTCAATACAACAACCGCTGCCAAAGTATTTCTAAAGCAATTTAACAGGAGCAATTGATTGCCCATACTTTA<br>AAAA <b>TAA</b> AACACTGATAGTGCTAGTGTAGATCACTACTAGAGCCAGGCATCAAATAAAACGAAAGGCTCAGTC<br>GAAAGACTGGGCCTTTCGTTTTATCTGTTGTTGTGCGGTGACGCTCTCTACTAGAGTCACACTGGCTCACCTTC<br>GGGTGGCCCTTCTGCGTTTATATACTAGAGACCTGTAGGATCGTACAGGTTTACGCAAGAAAATGGTTTTGTAT<br>AGTCGAATAAAATACTAGAGTCACACAGGAAAGTACTAG <b>ATG</b> ATCGAACTGCTGCCGAATCCCTGGAGGTTGTT<br>CCGCTGCTATGATCGCTGAACTGGGTCGTTACCCTCACCAGGTTTTTCATCGAAAACTGGGTTGGGACGTTGTTT<br>CCACCTCCCGTGTTCGTGACCAGGAGTTCGACCAGTTCGACCACCCGACAGCCGTTACATCGTTGCTATGTCCT<br>GTCAGGATCTGCGGTTGCGCTCGTCTGCTGCCGACCACCGAGCTTACCTGCTGAAAGACGTTTTTCGTTTACC<br>TGTGCTCCGAAACCCCGCCGTCGACCCGCTCCGTTTTGGGAAGTCTCCGTTACGCTGCTCCGCTGACGAC<br>CGCAGCTGGCTATGAAATCTTCTGGTCTCCCTCCAGTGCCTGGTACCTGGGTGCTTCTCCGTTGTTGCTG<br>TTACCACCACCGCTATGGAACGTTACTTCCGTTGTAACGTTGTTATCCTCCAGCCTGCTGGGTCCGCCGAGAAAG<br>TTAAAGGTGAAACCCCTGGTTGCTATCTCTCCCGGCTTACCAGGAACGTTGGTGGAAATGCTGCTGCTGCTTACC<br>ACCCGAAATGGCTCCAGGTTGTTCCGCTGCTCCATGGCTGTT <b>TAA</b> AATAACTAGAGCCAGGCATCAAATAAAACGAA<br>AAGGCTCAGTCGAAAGACTGGGCCTTTCGTTTTATCTGTTGTTGTGCGGTGACGCTCTCTACTAGAGTCACACT<br>GGCTCACCTTCGGGTGGCCCTTCTGCGTTTATA    |
| RL081A | pTET-<br>BBa_<br>B0034-<br>luxR-<br>BBa_<br>B0015-<br>pluxR-<br>BBa_<br>B0032-<br>R7<br>RNAP-<br>BBa_<br>B0015 | TCCCTATCAGTGATAGAGATTGACATCCCTATCAGTGATAGAGATACTGAGCACTACTAGAGAAAGAGGAGAAAT<br>ACTAG <b>ATG</b> AAAAACATAAAATGCCGACGACACATACAGAATAATTAATAAAAATAAAGCTTGTAGAAGCAATAATG<br>ATATTAATCAATGCTTATCTGATATGACTAAAATGGTACATTGTGAATATATTTACTCGCGATCATTTATCCTC<br>ATTCTATGGTTAAATCTGATATTTCAATCCTAGATAAATTACCCTAAAAATGGAGGCAATATATGATGACGCTA<br>ATTTAATAAAAATATGATCCTATAGTAGATTATCTAACTCCAATCATTCCCAATTAATTGGAATATATTTGAAA<br>ACAATGCTGTAATAAAAAATCTCCAAATGTAATTAAGAAGCGAAAAACATCAGGCTTTACTCGGTTAGTT<br>TCCCTATTCATACGGCTAACAAATGGCTTCGGAATGCTTAGTTTTGCACATTCAGAAAAAGACAACATATAGATA<br>GTTTATTTTTACATGCGGTGATGAACATACCATTAATTGTTCCTTCTCTAGTTGATAAATTATCGAAAAATAATA<br>TAGCAAAATAAAATCAAACAACGATTTAACCAAAAAGAGAAAAAGAAATGTTTAGCGTGGGCATGCCAAGGAAAA<br>GCTCTTGGGATATTTCAAAAATATTAGGTTGCAGTGAGCGTACTGTCACCTTCCATTTAACCAATGCCGAAATGA<br>AACTCAATACAACAACCGCTGCCAAAGTATTTCTAAAGCAATTTAACAGGAGCAATTGATTGCCCATACTTTA<br>AAAA <b>TAA</b> AACACTGATAGTGCTAGTGTAGATCACTACTAGAGCCAGGCATCAAATAAAACGAAAGGCTCAGTC<br>GAAAGACTGGGCCTTTCGTTTTATCTGTTGTTGTGCGGTGACGCTCTCTACTAGAGTCACACTGGCTCACCTTC<br>GGGTGGCCCTTCTGCGTTTATATACTAGAGACCTGTAGGATCGTACAGGTTTACGCAAGAAAATGGTTTTGTAT<br>AGTCGAATAAAATACTAGAGTCACACAGGAAAGTACTAG <b>ATG</b> AAACACGATTAACATCGTCAAGAACGACTTCTC<br>GACATCGAACTGGCTGCTATCCCGTTCAACACTCTGGCTGACCATTACGGTGAGCGTTTAGCTCGCGAACGTTG<br>GCCCTTGAGCATGAGTCTTACGAGATGGGTGAAGCAGCTTCCGCAAGATGTTTAGCGTCAACTTAAAGCTGGT<br>GAGGTTGGGATAACGCTGCCGCCAAGCCTCTCATCACTACCCTACTCCCTAAGATGATTGCACGCACTAACGAC                                                                                                                                                                                                                                                                                                                                                                                                                                                                                                                                   |

|        |                                                                                                                                                             |                                                                                                                                                                                                                                                                                                                                                                                                                                                                                                                                                                                                                                                                                                                                                                                                                                                                                                                                                                                                                                                                                                                                                                                                                                                                                                                                                                                                                                                                                                                                                                                                                                                                                                                                                                                                                                                                                                                                                                                                                                                                                                                                                                                                                                                                                                                                                                                                                                                                                                                                                                                                                                                                                                                                                                                                 |
|--------|-------------------------------------------------------------------------------------------------------------------------------------------------------------|-------------------------------------------------------------------------------------------------------------------------------------------------------------------------------------------------------------------------------------------------------------------------------------------------------------------------------------------------------------------------------------------------------------------------------------------------------------------------------------------------------------------------------------------------------------------------------------------------------------------------------------------------------------------------------------------------------------------------------------------------------------------------------------------------------------------------------------------------------------------------------------------------------------------------------------------------------------------------------------------------------------------------------------------------------------------------------------------------------------------------------------------------------------------------------------------------------------------------------------------------------------------------------------------------------------------------------------------------------------------------------------------------------------------------------------------------------------------------------------------------------------------------------------------------------------------------------------------------------------------------------------------------------------------------------------------------------------------------------------------------------------------------------------------------------------------------------------------------------------------------------------------------------------------------------------------------------------------------------------------------------------------------------------------------------------------------------------------------------------------------------------------------------------------------------------------------------------------------------------------------------------------------------------------------------------------------------------------------------------------------------------------------------------------------------------------------------------------------------------------------------------------------------------------------------------------------------------------------------------------------------------------------------------------------------------------------------------------------------------------------------------------------------------------------|
|        |                                                                                                                                                             | <p>TGGTTTGGAGGAGTGAAGCTAAGCGCGGCAAGCGCCGACAGCCTTCCAGTTCCCTGCAAGAAATCAAGCCGGAA<br/> GCCGTAGCGTACATACCATTAAGACCCTCTGGCTTGCCTAACCCAGTGTGACAATACACCCTCAGGCTGTA<br/> GCAAGCGCAATCGGTCGGGCCATTGAGGACGAGGCTCGCTTCGGTTCGTATCCGTGACTTGAAGCTAAGCACTT<br/> AAGAAAAACGTTGAGGAACAACCAACAAGCGCGTAGGGCAGCTCACAAGAAAGCATTTATGCAAGTTGTCGAG<br/> GCTGACATGCTCTAAGGGTCTACTCGGTGGCAGGCGTGGTCTTCTGTCGCATAAGGAAGACTCTATTCATGTA<br/> GGAGTACGCTGCATCGAGATGCTCATTGAGTCAACCGGAATGGTTAGCTTACACCGCCAAAATGCTGGCGTAGTA<br/> GGTCAAGACTCTGAGACTATCGAATCGCACTGAATACGCTGAGGCTATCGCAACCCTGCAGGTGGCGTGGCT<br/> GGCATCTCTCCGATGTTCCAACCTTTCGCTAGTTCCCTTAAGCCGTTGGACTGGCATTACTGGTGGTGGCTATTGG<br/> GCTAACGGTCTGCTCTCTGGCGTGGTGGCTACTCACAGTAAGAAAGCACTGATGCGCTACGAAGACGTTTAC<br/> ATGCCTGAGGTGTACAAAGCGATTAACTTTCGCAAAAACCCGCATGGAAAATCAACAAGAAAGTCTTAGCGGTC<br/> GCCAACGTAATCACCAAGTGAAGCATTGTCGGTGCAGGACATCCCTGCGATTGAGCCTGAAGAACTCCCGATG<br/> AAACCGGAAGACATCGACATGAATCCTGAGGCTCTCACCCGCTGGAACGCTGCTGCCGCTCTGTGTACCACAAG<br/> GACAAGGCTCGCAAGTCTCGCCGTATCAGCCTTGAAGTTCATGCTTGAAGCAAGCAATAAGTTGCTAACCATAG<br/> GCCATCTGGTTCCTTACAACATGGACTGGCGGGTGGTGTACGCTGTGTCAATGTTCAACCCGCAAGGTAAC<br/> GATATGACCAAAGGACTGCTTACGCTGGCGAAAGGTAACCAATCGGTAAGGAAGGTACTACTGGCTGAAAATC<br/> CACGGTCAAACTGTGCGGGTGTGATAAGTTCCGTTCCCTGAGCGCATCAAGTTCGCTGCTGTGTACCACAAG<br/> AACATCATGGCTTGGCTAAGTCTCCACTGGAGAACACTTGGTGGGCTGAGCAAGATTCTCCGTTCTGCTTCCCT<br/> CGCTTCTGCTTGGTACGCTGGGGTACAGCACCAGCGCTGAGCTATAACTGCTCCCTCCGCTGGCGTTTGGAC<br/> GGTCTTGTCTGGCATCCAGCACTTCTCCGCGATGCTCCGAGATGAGGTAGGTGGTCCGCGGTTAACTTGCTT<br/> CCTAGTGAACCGTTCAGGACATCTACGGGATTTGTTGCTAAGAAAGTCAACGAGATCTCTAAGCAAGCAATC<br/> AATGGGACCGATAACGAAGTAGTTACCGTGACCGATGAGAACACTGGTGAATCTCTGAGAAAGTCAAGCTGGGC<br/> ACTAAGGCACCTGGCTGGTCAATGGCTGGCTTACGGTGTACTCGCAGTGTGACTAAGCGTTCAGTTCATGACGCTG<br/> GCTTACGGGTCCAAAGAGTTCGGCTTCCGTTCAACAAGTGTGGAAGATACCATTGACCCAGCTATTGATTTCCGGC<br/> AAGGGTCTGATGTTCACTCAGCGGAATCAGGCTGCTGGATACATGGCTAAGCTGATTTGGGAATCTGTGAGCGTG<br/> ACGGTGGTAGCTGCGGTTGAAGCAATGAACGGCTTAAAGTCTGCTGCTAAGCTGCTGGCTGCTGAGGTCAAAGAT<br/> AAGAAGACTGGAGAGATTCTTCGCAAGCGTTCGCGTGTGCATTGGGTAACCTGATGGTTCCTGTGTGGCAG<br/> GAATACAAGAAGCCTATTACAGCGCGTTGAACCTGATGTTCCCTCGGTGAGTTCGCTTACAGCCTACCATTAA<br/> ACCAACAAGATAGCGAGATTGATGACACACAACAGGAGTCTGGTATCGCTCCTAACTTTGTACACAGCAAGAC<br/> GGTAGCCACCTTCGTAAGACTGTAGTGTGGGCACACGAGAAGTACGGAATCGAATCTTTGCACTGATTCACGAC<br/> TCCTTCGGTACCATTCCGGCTGACGCTGCGAACCTGTTCAAAGCAGTTCGCGGAAACTATGGTTGACACATATGAG<br/> TCTTGTGATGACTGGCTGATTTCTACGACCAGTTCGCTGACCAGTTGCACGAGTCTCAATTGGCAAAAATGCCA<br/> GCACCTCCCGGCTAAAGGTAACCTGAACCTCCGTCGATCTTAGAGTCGGACTTCGGGTTCCGCGTAAATACTAG<br/> AGCCAGGCATCAAATAAAACGAAAGGCTCAGTCGAAAGACTGGGCCTTTCGTTTTATCTGTTGTTTGTGCGGTGAA<br/> CGCTCTACTAGAGTCACACTGGCTCACCTTCGGGTGGGCTTTTCTGCGTTTATA</p> |
| RL086A | <p>pTET-<br/> BBa_ B0034-<br/> T33A<br/> S116A<br/> M135I<br/> luxR-<br/> BBa_ B0015-<br/> pluxR-<br/> BBa_ B0032-<br/> GFpmut<br/> 3b-<br/> BBa_ B0015</p> | <p>TCCCTATCAGTGATAGAGATTGACATCCCTATCAGTGATAGAGATACTGAGCACTACTAGAGAAAGAGGAGAAAT<br/> ACTAGATGAAAAACATAAAATGCCGACGACACATACAGAATAATTAATAAAATTAAGCTTGTAGAAGCAATAATG<br/> ATATTAATCAATGCTTATCTGATATGGCGAAAATGGTACATTGTGAATATTTACTCGCGATCATTTATCCTC<br/> ATTCTATGGTTAAATCTGATATTTCAATCCTAGATAAATACCTAAAAATGGAGCAATATATGATGACGCTA<br/> ATTTAATAAAATATGATCCTATAGTAGATTATTTCACTCAATCATTACCAATTAATTTGGAATATATTTGAAA<br/> ACAATGCTGTAATAAAAAATCTCCAAATGTAATTAAGAAGCGAAAACAGCGGGTCTTATCACTGGGTTAGTT<br/> TCCCTATTTCATACGGCTAACCAATGGCTTCGGAATTTAGTTTTGCACATTCAGAAAAAGACAACATATATAGATA<br/> GTTTTATTTTACATGCGTGTATGAACATACCATTAAATGTTCCCTTCTAGTTGATAATTATCGAAAAATAATA<br/> TAGCAAAATAAAATCAAACAACGATTTAAACAAAAGAGAAAAAGAAATGTTAGCGTGGGCATGCGAAGGAAAA<br/> GCTCTTGGGATATTTCAAAAATATTAGGTTGCAGTACGCTACTGCTCACTTTCCATTTAACCAATGCGCAAAATGA<br/> AACTCAATACAACAACCCGCTGCCAAAGTATTTCTAAAGCAATTTTAAACAGGAAATTTGATTTGCCAATCTTA<br/> AAAATTAATAACACTGATAGTGTAGTGTAGATCACTACTAGAGCCAGGCATCAAATAAAACGAAAGGCTCAGTC<br/> GAAAGACTGGGCCTTTCGTTTTATCTGTTGTTTGTGCGGTGAACGCTCTCTACTAGAGTCACACTGGCTCACCTTC<br/> GGTGGGCCTTTCGCGTTTATATACTAGAGACTGAGGATCGTACAGGTTTACGCAAGAAATGGTTTTGTAT<br/> AGTCGAATAAAATACAGATCACACAGGAAGCTAGATGACTACTATAATGATAAAATTAAGCTTCTTTTGGCAA<br/> TTCCATCGGAGGAGTATAAAGGTATTTCAAGTCTTCGTTATCAAGTGTTTAAGCAAGACTTGGTGGGACTTAG<br/> TTGTAGAAAAATAACCTTGAATCAGATGAGTATGATAACTCAAATGCAGAATATATTTATGCTTGTGATGACTG<br/> AAAATGTAAGTGGATGCTGGCGTTTATTAACCTACAACAGGTGATTATATGCTGAAAAGTGTTTTTCTGAAATGC<br/> TTGGTCAACAGAGTTGCTCCCAAGATCCTAATATAGTCAATTAAGTCTGTTTTGCTGAGTAAAAATAGCTCAA<br/> AGATAAATAACTCTGCTAGTAAATTAACAATAACTATTTGAAGCTATATAAACAACGCTGTTAGTCAAGGTA<br/> TTACAGAATATGTAACAGTAACATCAACAGCAATAGAGCGATTTTAAAGCGTATAAAGTTCCTGTGATCGTA<br/> TTGGAGACAAGAAATTCATGTATTAGGTGATACTAAATCGGTTGATTGCTATGCCTATTAATGAACAGTTTA<br/> AAAAAGCAGTCTTAAATTAATAACTAGAGCCAGGCATCAAATAAAACGAAAGCTCAGTCGAAAGACTGGGCC<br/> TTTCGTTTTATCTGTTGTTTTGTCGGTGAACGCTCTACTAGAGTCACACTGGCTCACACTGGGTTGGCCCTTTC<br/> TGCCTTTATA</p>                                                                                                                                                                                                                                                                                                                                                                                                                                                                                                                                                                                                                                                                                                                                                                                               |
| RL087A | <p>pTET-<br/> BBa_ B0034-<br/> T33A<br/> R65M<br/> S116A<br/> M135I<br/> luxR-<br/> BBa_ B0015-<br/> pluxR-<br/> BBa_</p>                                   | <p>TCCCTATCAGTGATAGAGATTGACATCCCTATCAGTGATAGAGATACTGAGCACTACTAGAGAAAGAGGAGAAAT<br/> ACTAGATGAAAAACATAAAATGCCGACGACACATACAGAATAATTAATAAAATTAAGCTTGTAGAAGCAATAATG<br/> ATATTAATCAATGCTTATCTGATATGGCGAAAATGGTACATTGTGAATATTTACTCGCGATCATTTATCCTC<br/> ATTCTATGGTTAAATCTGATATTTCAATCCTAGATAAATACCTAAAAATGGATGCAATATATGATGACGCTA<br/> ATTTAATAAAATATGATCCTATAGTAGATTATTTCACTCAATCATTACCAATTAATTTGGAATATATTTGAAA<br/> ACAATGCTGTAATAAAAAATCTCCAAATGTAATTAAGAAGCGAAAACAGCGGGTCTTATCACTGGGTTAGTT<br/> TCCCTATTTCATACGGCTAACCAATGGCTTCGGAATTTAGTTTTGCACATTCAGAAAAAGACAACATATAGATA<br/> GTTTTATTTTACATGCGTGTATGAACATACCATTAAATGTTCCCTTCTAGTTGATAATTATCGAAAAATAATA<br/> TAGCAAAATAAAATCAAACAACGATTTAAACAAAAGAGAAAAAGAAATGTTAGCGTGGGCATGCGAAGGAAAA<br/> GCTCTTGGGATATTTCAAAAATATTAGGTTGCAGTACGCTACTGCTCACTTTCCATTTAACCAATGCGCAAAATGA<br/> AACTCAATACAACAACCCGCTGCCAAAGTATTTCTAAAGCAATTTTAAACAGGAAATTTAAGCAAGAAATTTG<br/> AAAATTAATAACACTGATAGTGTAGTGTAGATCACTACTAGAGCCAGGCATCAAATAAAACGAAAGGCTCAGTC</p>                                                                                                                                                                                                                                                                                                                                                                                                                                                                                                                                                                                                                                                                                                                                                                                                                                                                                                                                                                                                                                                                                                                                                                                                                                                                                                                                                                                                                                                                                                                                                                                                                                                                                                                                                                                                     |



|                                                     |                                                                                                                                       |                                                                                                                                                                                                                                                                                                                                                                                                                                                                                                                                                                                                                                                                                                                                                                                                                                                                                                                                                                                                                                                                                                                                                                                                                                                                                                                                                                                                                                                                                                                                                                                                                                                                                                                                                                                                                                                                                                                                                                                                                                                                                                                                                                                                                                                                                                                                                                                                                                                                                                                                                                                                                                                                                                                                                                                                                                                                                                                                                                                                                                                                                                                                                                                                                                                                                                                                                                                     |
|-----------------------------------------------------|---------------------------------------------------------------------------------------------------------------------------------------|-------------------------------------------------------------------------------------------------------------------------------------------------------------------------------------------------------------------------------------------------------------------------------------------------------------------------------------------------------------------------------------------------------------------------------------------------------------------------------------------------------------------------------------------------------------------------------------------------------------------------------------------------------------------------------------------------------------------------------------------------------------------------------------------------------------------------------------------------------------------------------------------------------------------------------------------------------------------------------------------------------------------------------------------------------------------------------------------------------------------------------------------------------------------------------------------------------------------------------------------------------------------------------------------------------------------------------------------------------------------------------------------------------------------------------------------------------------------------------------------------------------------------------------------------------------------------------------------------------------------------------------------------------------------------------------------------------------------------------------------------------------------------------------------------------------------------------------------------------------------------------------------------------------------------------------------------------------------------------------------------------------------------------------------------------------------------------------------------------------------------------------------------------------------------------------------------------------------------------------------------------------------------------------------------------------------------------------------------------------------------------------------------------------------------------------------------------------------------------------------------------------------------------------------------------------------------------------------------------------------------------------------------------------------------------------------------------------------------------------------------------------------------------------------------------------------------------------------------------------------------------------------------------------------------------------------------------------------------------------------------------------------------------------------------------------------------------------------------------------------------------------------------------------------------------------------------------------------------------------------------------------------------------------------------------------------------------------------------------------------------------------|
| <p>B0032-<br/>GFpmut<br/>3b-<br/>BBa_<br/>B0015</p> |                                                                                                                                       | <p>GAAAGACTGGGCCTTTCTGTTTTATCTGTTGTTGTGCGGTGAACGCTCTCTACTAGAGTCACACTGGCTCACCTTC<br/>GGGTGGGCCTTTCTGCGTTTTATATACTAGAGACCTGTAGGATCGTACAGGTTTACGCAAGAAAATGGTTTTGTAT<br/><b>AGTCGAATAAA</b>TACTAGAGTCACACAGGAAAGTACTAG<b>ATG</b>ACTATAATGATAAAAAATCGGATTTTTGGCAA<br/>TTCCATCGGAGGAGTATAAAGGTATTCTAAGTCTTTCGTTATCAAGTGTTTAAGCAAAGACTTGAGTGGGACTAG<br/>TTGTAGAAAATAACCTTGAATCAGATGAGTATGATAACTCAAATGCAGAATATATTTATGCTTGTGATGATACTG<br/>AAAATGTAAGTGGATGCTGGCGTTTTATTACCTACAACAGGTGATTATATGCTGAAAAGTGTTTTTCTGAAATTGC<br/>TTGGTCAACAGAGTGTCCCAAAGATCCTAATATAGTCGAATTAAGTCGTTTTGCTGTAGTAAAAATAGCTCAA<br/>AGATAAATAACTCTGCTAGTGAATTACAATGAAACTATTGAAGCTATATATAAACACCGTGTTAGTCAAGGTA<br/>TTACAGAATATGTAACAGTAACATCAACAGCAATAGAGCGATTTTTAAAGCGTATTAAAGTTCCTTGTATCGTA<br/>TTGGAGACAAAAGAAATTCATGTATTAGGTGATACTAAATCGGTTGTATTGCTATGCCTATTAATGAACAGTTTTA<br/>AAAAAGCAGTCTAAAT<b>TAA</b>TAATACTAGAGCCAGGCATCAAATAAAACGAAAGGCTCAGTCGAAAGACTGGGCC<br/>TTTTGTTTTATCTGTTGTTTGTGCGTGAACGCTCTCTACTAGAGTCACACTGGCTCACCTTCGGGTGGGCCTTTC<br/>TGCCTTTATA</p>                                                                                                                                                                                                                                                                                                                                                                                                                                                                                                                                                                                                                                                                                                                                                                                                                                                                                                                                                                                                                                                                                                                                                                                                                                                                                                                                                                                                                                                                                                                                                                                                                                                                                                                                                                                                                                                                                                                                                                                                                                                                                                                                                                                                                                                                                                                                                  |
| <p>RL089C</p>                                       | <p>pTET-<br/>BBa_<br/>B0034-<br/>aiiA-<br/>BBa_<br/>B0015</p>                                                                         | <p>TCCCTATCAGTGATAGAGATTGACATCCCTATCAGTGATAGAGATACTGAGCACTACTAGAGAAAGAGGAGAAAT<br/>ACTAG<b>ATG</b>ACAGTAAAGAAGCTTATTTCGTCGCCAGCAGGTCGTTGTATGTTGGATCATTCTGCTGTTAATAGTA<br/>CATTAAACACCAGGAGAAATTATTAGACTTACCGGTTTGGTGTATCTTTTGGAGACTGAAGAAGGACCTATTTTAG<br/>TAGATACAGGTATGCCAGAAAGTGCAGTTAATAATGAAGGCTTTTTTAACGGTACATTTGTCGAAGGGCAGGTTT<br/>TACCGAAAATGACTGAAGAAGATAGAATCGTGAATATTTTAAAACGGGTTGGTTATGAGCCGGAAGACCTTCTTT<br/>ATATTATTAGTCTCACTTGCATTTTGATCATGCAGGAGGAAATGGCGCTTTTATAAATACACCAATCATGTGAC<br/>AGCGTGTGAATATGAGGCGGCGCAGCATAGCGAAGAATATTTGAAAAGATGTATATGCCGAATTTAAACTACA<br/>AAATCATTGAAGGTGATTATGAAGTGTACCAGGAGTCAATATATGCATACACACAGGCTACTCCAGGCGATC<br/>AATCGCTATTAATTGAGACAGAAAATCCGGTCTGTATTATTAACGATTGATGCATCGTATACGAAAGAGAATT<br/>TTGAAAATGAAGTGCATTTTGGGGATTGATTGAGAAATAGCTTTATCTCAATTAACGTTTAAAGAAAGTGG<br/>TGATGAAAGAGAAGCCGATTGTTTTCTTGGACATGATATAGAGCAGGAAAGGGGATGAAAAGTGTCCCTGAAT<br/>ATATA<b>TAA</b>CGCTGATAGTGTAGTGTAGTGTAGTGTAGTGTAGTGTAGTGTAGTGTAGTGTAGTGTAGTGTAGTGTAGT<br/>AGACTGGGCCTTTTCGTTTTATCTGTTGTTTTGTCGGTGAACGCTCTCTACTAGAGTCACACTGGCTCACCTTCGGG<br/>TGGCCTTTCTGCGTTTATA</p>                                                                                                                                                                                                                                                                                                                                                                                                                                                                                                                                                                                                                                                                                                                                                                                                                                                                                                                                                                                                                                                                                                                                                                                                                                                                                                                                                                                                                                                                                                                                                                                                                                                                                                                                                                                                                                                                                                                                                                                                                                                                                                                                                                                                                                                                    |
| <p>RL092A</p>                                       | <p>pTET-<br/>BBa_<br/>B0034-<br/>lasR-<br/>BBa_<br/>B0015-<br/>pluxR-<br/>BBa_<br/>B0032-<br/>lucife<br/>rase-<br/>BBa_<br/>B0015</p> | <p>TCCCTATCAGTGATAGAGATTGACATCCCTATCAGTGATAGAGATACTGAGCACTACTAGAGAAAGAGGAGAAA<br/>TACTAGT<b>ATG</b>CGCTTGGTTGACGGTTTTCTTGGAGCTGGAACGCTCAAGTGGAAAATTTGGAGTGGAGCGCCATCCCT<br/>CCAGAAGATGGCGAGCGACCTTGGATTCCTGAAGATCTCTGTCGGCTGTTCGCTTAAGSACAGCCAGGACTACGA<br/>GAACGCTTTCATCTCGTCCGCACTACCCGGCCGCTGGCGCGAGCATACGACCCGGCTGGCTACGCGCGGTTCGA<br/>CCCGACGGTCACTGACTGTACCCAGAGCGTACTGCCGATTTCTGGGAACCGTCCATCTACCAGACGCGAAAGCA<br/>GCACGAGTCTTCGAGGAAGCCTCGCCCGCGCCCTGGTGTATGGCTGACCATGCCGCTCATGGTGTCTCGCGG<br/>CGAACTCGGCGCGCTGAGCCTCAGCGTGGAAAGCGAAAACCGGGCCGAGGCCAACCGTTTATAGAGTCCGTCCT<br/>GCCGACCTGTGGATGCTCAAGACTACGCCTGCAAAAGCGGTGCCGACTGGCTTCAAGCACTCCGCTGCAACAA<br/>ACCGGTGGTTCGACCAGCCGGGAGAAGGAAGTGTGAGTGGTGGCCATCGGCAAGACCAGTGGGAGATATC<br/>GGTTATCTGCAACTGCTCGGAAGCCAAATGTGAACCTCCATATGGGAAATATTCGGCGGAAGTTCGGTGTGACCTC<br/>CCGCCGCTAGCGGCCATTATGGCCGTTAATTTGGGTCTTATTACTCT<b>TAA</b>CACTAGTGTAGTGTAGTGTAGTGTAGT<br/>ACTACTAGAGCCAGGCATCAAATAAAACGAAAGGCTCAGTGCAGAAAGACTGGCCCTTTCGTTTTATCTGTTGTTG<br/>TCGGTGAACGCTCTCTACTAGAGTCACACTGGCTCACCTTCGGGTGGGCCTTTCTGCGTTTTATATACTAGAGACC<br/><b>TGTAGATCGTACAGGTTTACGCAAGAAAATGGTTTGTATAGTCAATAAAATAC</b>TAGAGTCACACAGGAAAGT<br/>ACTAG<b>ATG</b>GAAGACGCCAAAACATAAAGAAAGGCCCGCGCCATTTCTATCTCTAGAGGATGGAACCGCTGGAG<br/>AGCAACTGCATAAGGCTATGAAGAGATACGCCCTGGTTCCGGAACAATGCTTTTGTGAGTATTTCTGTCTGAT<br/>TTCTTTCGAGTTAACGAAATGTTCTATGTTTCTTATAGACAGATGCATATCAGGTTGAACCTACGACCGCGG<br/>AATACTTCGAAATGTCGGTTCGGTTGGCAGAAGCTATGAAACGATATGGGCTGAATACAAATCACAGAATCGTCCG<br/>TATGCACTGAAAACCTCTCTCAATTTTATGCCGCTGTTGGCGCGTTATTTATCGGAGTTCAGTTCGCCCGG<br/>CGAACGACATTTATAATGAACGTAAGCACCTCGCCATCAGACCAAAGGGAATGACGTATTTAATTTTTAAGGTG<br/>AATTGCTCAACAGTATGAAACATTTCCGACCTACCGTACTGTTGTTTCCAAAAGGGTTGCAAAAATTTTGA<br/>ACGTGCAAAAATAATACCAATAATCCAGAAAATTTATCATGGATTCTAAAACGGATTACCAGGGATTTCAGT<br/>CGATGTACAGTTCGTCACATCTCATCTACCTCCCGGTTTTAATGAATACGATTTTGTACCAGAGTCTTTGATC<br/>GTGACAAAACAATGCACTGATAATGAATTCCTCTGGATCTACTGGGTTACCTAAGGGTGTGGCCCTTCCGCATA<br/>GAATGCCTGCGTCAGATTCTCGCATGCCAGGTATGTCGTATAACAGAGATTAAGTAATGTTGCTACACACTT<br/>GTAGAGATCCTATTTTTGGCAATCAAATCATTCCGGATACTGCGATTTTAAAGTGTGTTCCATTCCATCACGGTT<br/>TTGGAATGTTTACTACACTCGGATATTGATATGGATTTCGAGTCTGCTTAATGTATAGATTTGAAGAAGAGC<br/>TGTTTTTACGATCCCTTCAGGATTCAAAAATCAAAGTGCCTGTAGTACCAACCCATTTTCAATTTCTTCGCCA<br/>AAAGCACTCTGATTGACAAATACGATTTATCTAATTTACACGAAATGCTTTCGGGGCGCACCTCTTTCGAAAG<br/>AAGTCGGGGAAGCGGTTGCAAAAACGGTGAAGTAAAGCGCATTGCTAGTATTTCAAGGCTCTAAAACGGCGGTAGC<br/>TTCATCTTCCAGGGATACGACAAGGATATGGGCTCACTGAGACTACATCAGTATTTCTGATACACCCGAGGGG<br/>GATGATAAACCGGGCGCGGTGAAAGTGTTCATTTTTTGAAGCGAAGGTTGTGGATCTGGATACCGGGAAA<br/>ACGCTGGGCGTTAATCAGAGAGGCGAATTAATGTCAGAGGACCTATGATTATGTCGGTGTGTTAAACAATCCG<br/>GAAGCGACCAACGCTTGAATTGACAAGGATGGATGGCTACATTTCTGGAGACATAGCTTACTGGGACGAAGACGAA<br/>CACTTCTCATAGTTGACCGTGTGAAGTCTTAAATTAATAACAAAGGATATCAGGTAATGAAGATTTTTACATGC<br/>ACACACGCTACAATACCTGTAGGTGGCCCCGCTGAATTTGAATCGATATGTTTAAACACCCCAACATCTTCGA<br/>CGCGGGCGTGGCAGGTTTCCCGACGATGACGCGGTTGAACCTTCCCGCGCGGTTGTTGTTTACGTTACTCGTACTACAATT<br/>CCTTTTCATAGGTCAAGTAACAACCGGAAAAGTTCGCGGAGGAGTTGTGTTTGTGACGAAGTACCGAAAGGT<br/>CTTACCGGAAAACCTCGACGCAAGAAAATCAGAGAGATCCATAAAGGCCAAGAAGGGCGGAAAGTCCAAATTTG<br/><b>TAA</b>TAATACTAGAGCCAGGCATCAAATAAAACGAAAGGCTCAGTCGAAAGACTGGGCCTTTTCGTTTTATCTGTTG<br/>TTTGTGCGTGAACGCTCTCTACTAGAGTCACACTGGCTCACCTTCGGGTGGGCCTT</p> |

|                                                                                                                                                                                            |                                                                                                                                                                                                                                                                                                                                                                                                                                                                                                                                                                                                                                                                                                                                                                                                                                                                                                                                                                                                                                                                                                                                                                                                                                                                                                                                                                                                                                                                                                                                                                                                                                                                                                                                                                                                                                                                                                                                                                                                                                                                                                                                                                                                                                                                                                                                                                                                                                                                                                                                                                                                                                                                                                                                                                                                                                                                                                                                                                                                                                                                                                                                                                                                                                                                                                                                                                                                                                                                                                      |
|--------------------------------------------------------------------------------------------------------------------------------------------------------------------------------------------|------------------------------------------------------------------------------------------------------------------------------------------------------------------------------------------------------------------------------------------------------------------------------------------------------------------------------------------------------------------------------------------------------------------------------------------------------------------------------------------------------------------------------------------------------------------------------------------------------------------------------------------------------------------------------------------------------------------------------------------------------------------------------------------------------------------------------------------------------------------------------------------------------------------------------------------------------------------------------------------------------------------------------------------------------------------------------------------------------------------------------------------------------------------------------------------------------------------------------------------------------------------------------------------------------------------------------------------------------------------------------------------------------------------------------------------------------------------------------------------------------------------------------------------------------------------------------------------------------------------------------------------------------------------------------------------------------------------------------------------------------------------------------------------------------------------------------------------------------------------------------------------------------------------------------------------------------------------------------------------------------------------------------------------------------------------------------------------------------------------------------------------------------------------------------------------------------------------------------------------------------------------------------------------------------------------------------------------------------------------------------------------------------------------------------------------------------------------------------------------------------------------------------------------------------------------------------------------------------------------------------------------------------------------------------------------------------------------------------------------------------------------------------------------------------------------------------------------------------------------------------------------------------------------------------------------------------------------------------------------------------------------------------------------------------------------------------------------------------------------------------------------------------------------------------------------------------------------------------------------------------------------------------------------------------------------------------------------------------------------------------------------------------------------------------------------------------------------------------------------------------|
| <p>RL093A</p> <p>pTET-<br/>BBa_<br/>B0034-<br/>T33A<br/>R65M<br/>S116A<br/>M135I-<br/>luxR-<br/>BBa_<br/>B0015-<br/>pluxR-<br/>BBa_<br/>B0032-<br/>lucife<br/>rase-<br/>BBa_<br/>B0015</p> | <p>TCCCTATCAGTGATAGAGATTGACATCCCTATCAGTGATAGAGATACTGAGCACTACTAGAGAAAAGAGGAGAAT<br/>ACTAG<b>ATG</b>AAAAACATAAAATGCCGACGACACATACAGAATAATTAATAAAAATAAAGCTTGTAGAAGCAATAATG<br/>ATATTAATCAATGCTTATCTGATATGGCGAAAATGGTACATGTGAATATATTTACTCGCGATCATTATCCTC<br/>ATTCTATGGTTAAATCTGATATTTCAATCCTAGATAATTACCCTAAAAAATGGATGCAATATATGATGACGCTA<br/>ATTTAATAAAAATATGATCCTATAGTAGATTATTCTAACTCCAATCATTCCCAATTAATTGGAATATATTTGAAA<br/>ACAATGCTGTAATAAAAAAATCTCCAAATGTAATTAAGAAGCGAAAAACAGCGGGTCTTATCACTGGGTTTAGTT<br/>TCCCTATTCATACGGCTAACAAATGGCTTCGGAATTTCTAGTTTTCACATTCAGAAAAAGACAACATATATAGATA<br/>GTTTATTTTTACATGCGTGTATGAACATACCATTAATTTGTCCTTCTAGTTGATAAATTCGAAAAATAAATA<br/>TAGCAATAATAAATCAAACAACGATTTAACCAAAAAGAGAAAAAGAAATGTTTAGCGTGGGCATGCGAAGGAAAA<br/>GCTCTTGGGATATTTCAAAAATATTAGGTTGCAGTGAGCGTACTGTCACCTTCCATTTAACCAATGCGCAATGA<br/>AACTCAATACAACAAACCGCTGCCAAAGTATTTCTAAAGCAATTTTAACAGGAGCAATGATTGCCACACTTTA<br/>AAAAT<b>TA</b>AACACTGATAGTGTAGTGTAGATCACTACTAGAGCCAGGCATCAAAATAAACGAAAGGCTCAGTC<br/>GAAAGACTGGGCCTTTCGTTTTATCTGTTGTTGTGCGGTGAACGCTCTCTACTAGAGTCACACTGGCTCACCTTC<br/>GGGTGGGCCTTCTGCGTTTTATATACTAGAGACCTGTAGGATCGTACAGGTTTACGCAAGAAAATGGTTTGTAT<br/>AGTCGAATAAAATACTAGAGTCACACAGGAAAGTACTAG<b>ATG</b>GAAGACGCCAAAAACATAAAGAAAGGCCCGGCGC<br/>CATTCTATCCTCTAGAGGATGGAACCGCTGGAGAGCAACTGCATAAGGCTATGAAGATACCGCTCCGCTCAGT<br/>GAACAATTGCTTTTGTGAGTATTTCTGTCTGATTTCTTTCGAGTTAACGAAATGTTCTTATGTTTCTTTAGACAG<br/>ATGCACATATCGAGGTGAACATCACGTACGCGGAATACTTCGAAATGTCGGTTCGGTGGCAGAAGCTATGAAAC<br/>GATATGGGCTGAATACAAATCACAGAATCGTCGTATGCAGTGAAACTCTCTCAATTTCTTATGCCGGTGTGG<br/>GCGCGTTATTTATCGGAGTTGCAGTTGCGCCCGCAACGACATTTATAATGAACGATAAAGCAATGAAAGCTCAGA<br/>CCAAAGGGAATGACGTATTTAATTTTTAAGGTGAATGCTCAACAGTATGAACATTTGCGAGCCTACCGTAGTGT<br/>TTGTTTCCAAAAGGGGTTGCAAAAATTTTGAACGTGCAAAAAAATTACCAATAATCCAGAAAATATTTATCA<br/>TGGATTCTAAAACGGATTACCAGGGATTTAGTTCGATGTACACGTTCTGCATCATCTACCTCCCGGTTTTTA<br/>ATGAATACGATTTTGTACCAGATCCTTTGATCGTGACAAAACAATTGCATGATAAATTCCTCTGGATCTA<br/>CTGGGTTACCTAAGGGTGTGGCCCTTCCGCATAGAACTGCCTGCGTCAGATTCTCGCATGCCAGGTATGTCGTAT<br/>AACAAGAGATTAAGTAATGTTGCTACACACATTTGTAGAGATCCTATTTTTGGCAATCAAAATCATTCCGGATCTG<br/>CGATTTTAAGTGTGTTCCATTTCCATCACGGTTTTTGGAAATGTTTACTACACTCGGATATTTGATATGTGGATTT<br/>GAGTCGTCTTAATGTATAGATTTGAAGAAGAGCTGTTTTTACGATCCCTTACGATTTACAAAATTCCTCTGGATCTA<br/>TGCTAGTACCAACCCATTTTTCATTTCTCGCCAAAAGCACTCTGATTGACAAATACGATTTATCTAATTTACACG<br/>AAATGCTTTCGGGGCGCACCTCTTTCGAAAGAAGTCCGGGAAGCGGTTGCAAAACGGTGAATTAAGCGCATG<br/>CTAGTATTTCAAGGCTCTAAAACCGCGCTAGCTTCCATCTTCCAGGATACGACAAAGGATATGGGCTCACTGAG<br/>ACTACATCAGCTATTTCTGATTACACCGAGGGGATGATAAACCGGGCGCGTCCGTTAAAGTTTTCATTTT<br/>GAAGCGAAGGTTGTGGATCTGGATACCGGGAAAACGCTGGCGTTAATCAGAGAGCGAATTTATGTCAGAGGA<br/>CCTATGATTAATGTCGGGTTATGTAACAATCCGGAAGCGACCAACGCTTATTGACAAAGGATGGATGGCTACAT<br/>TCTGGAGACATAGCTTACTGGGACGAAGACGAACACTTCTCATAGTTGACCGTTGAAGTCTTTAATTAATAATC<br/>AAAGGATATCAGGTAATGAAGATTTTACATGCACACAGCTACAATACCTGTAGTGGCCCGCTGAATTTGGA<br/>ATCGATATTGTTACAACACCCCAACATCTTTCGACGCGGGCGTGGCAGGTTCTCCGACGATGACGCGGTTGA<br/>TCCCAGCGCGCTTGTGTTTTGGAGCACGGAAGACGATGACGGAAGAGATCGTGGATTACGTCGCCAGTAA<br/>ATGAATTCGTTTTACGTTACTCGTACTACAATTTCTTTTCAAGTCAAGTAAACCGCGAAAAAGTTGCGCGGA<br/>GGAGTTGTGTTGTGGACGAAGTACCGAAAGGCTTACCAGAAAACCTCGACGCAAGAAAATCAGAGAGATCCTC<br/>ATAAAGGCCAAGAAGGGCGGAAAGTCCAAATG<b>TA</b>AATAACTAGAGCCAGGCATCAAAATAAACGAAAGGCTCA<br/>GTCGAAAGACTGGGCCTTTCGTTTTATCTGTTGTTTGTGCGGTGAACGCTCTCTACTAGAGTCACACTGGCTCAC<br/>TTCGGGTGGGCCTTTCTGCGTTTTATA</p> |
| <p>RL094A</p> <p>pTET-<br/>BBa_<br/>B0034-<br/>T33A<br/>S116A<br/>M135I<br/>luxR-<br/>BBa_<br/>B0015-<br/>pluxR-<br/>BBa_<br/>B0032-<br/>lucife<br/>rase-<br/>BBa_<br/>B0015</p>           | <p>TCCCTATCAGTGATAGAGATTGACATCCCTATCAGTGATAGAGATACTGAGCACTACTAGAGAAAAGAGGAGAAT<br/>ACTAG<b>ATG</b>AAAAACATAAAATGCCGACGACACATACAGAATAATTAATAAAAATAAAGCTTGTAGAAGCAATAATG<br/>ATATTAATCAATGCTTATCTGATATGGCGAAAATGGTACATGTGAATATATTTACTCGCGATCATTATCCTC<br/>ATTCTATGGTTAAATCTGATATTTCAATCCTAGATAATTACCCTAAAAAATGGAGCAATATATGATGACGCTA<br/>ATTTAATAAAAATATGATCCTATAGTAGATTATTCTAACTCCAATCATTCCCAATTAATTGGAATATATTTGAAA<br/>ACAATGCTGTAATAAAAAAATCTCCAAATGTAATTAAGAAGCGAAAAACAGCGGGTCTTATCACTGGGTTTAGTT<br/>TCCCTATTCATACGGCTAACAAATGGCTTCGGAATTTCTAGTTTTCACATTCAGAAAAAGACAACATATATAGATA<br/>GTTTATTTTTACATGCGTGTATGAACATACCATTAATTTGTCCTTCTAGTTGATAAATTCGAAAAATAAATA<br/>TAGCAATAATAAATCAAACAACGATTTAACCAAAAAGAGAAAAAGAAATGTTTAGCGTGGGCATGCGAAGGAAAA<br/>GCTCTTGGGATATTTCAAAAATATTAGGTTGCAGTACGCTACTGTCACCTTCCATTTAACCAATGCGCAAAATGA<br/>AACTCAATACAACAAACCGCTGCCAAAGTATTTCTAAAGCAATTTTAACAGGAGCAATGATTGCCACACTTTA<br/>AAAAT<b>TA</b>AACACTGATAGTGTAGTGTAGATCACTACTAGAGCCAGGCATCAAAATAAACGAAAGGCTCAGTC<br/>GAAAGACTGGGCCTTTCGTTTTATCTGTTGTTTGTGCGGTGAACGCTCTCTACTAGAGTCACACTGGCTCACCTTC<br/>GGGTGGGCCTTTCGCGTTTTATATACTAGAGACCTGTAGGATCGTACAGGTTTACGCAAGAAAATGGTTTGTAT<br/>AGTCGAATAAAATACTAGAGTCACACAGGAAAGTACTAG<b>ATG</b>GAAGACGCCAAAAACATAAAGAAAGGCCCGGCGC<br/>CATTCTATCCTCTAGAGGATGGAACCGCTGGAGAGCAACTGCATAAGGCTATGAAGATACGCGCTGGTTCCTG<br/>GAACAATTGCTTTTGTGAGTATTTCTGTCTGATTTCTTTCGAGTTAACGAAATGTTCTTATGTTTCTTTAGACAG<br/>ATGCACATATCGAGGTGAACATCACGTACGCGGAATACTTCGAAATGTCGGTTCGGTGGCAGAAGCTATGAAAC<br/>GATATGGGCTGAATACAAATCACAGAATCGTCGTATGCAGTGAAACTCTCTCAATTTCTTATGCCGGTGTGG<br/>GCGCGTTATTTATCGGAGTTGCAGTTGCGCCCGCAACGACATTTATAATGAACGTAAGCACCCCTCGCCATCAGA<br/>CCAAAGGGAATGACGTATTTAATTTTTAAGGTGAATGCTCAACAGTATGAACATTTGCGAGCCTACCGTAGTGT<br/>TTGTTTCCAAAAGGGGTTGCAAAAATTTTGAACGTGCAAAAAAATTACCAATAATCCAGAAAATATTTATCA<br/>TGGATTCTAAAACGGATTACCAGGGATTTAGTTCGATGTACACGTTCTGCATCATCTACCTCCCGGTTTTTA<br/>ATGAATACGATTTTGTACCAGAGTCTTTGATCGTGACAAAACAATTGCATGATAATGAATTCCTCTGGATCTA<br/>CTGGGTTACCTAAGGGTGTGGCCCTTCCGCATAGAACTGCCTGCGTCAGATTCTCGCATGCCAGGTATGTCGTAT<br/>AACAAGAGATTAAGTAATGTTGCTACACACATTTGTAGAGATCCTATTTTTGGCAATCAAAATCATTCCGGATCTG<br/>CGATTTTAAGTGTGTTCCATTTCCATCACGGTTTTTGGAAATGTTTACTACACTCGGATATTTGATATGTGGATTT</p>                                                                                                                                                                                                                                                                                                                                                                                                                                                                                                                                                                                                                                                                                                                                                                                                                                                                                                                                                                                                                                                                                                                                                                                                                                                     |

|       |                                                                                                                                                 |                                                                                                                                                                                                                                                                                                                                                                                                                                                                                                                                                                                                                                                                                                                                                                                                                                                                                                                                                                                                                                                                                                                                                                                                                                                                                                                                                                                                                                                                                                                                                                                                                                                                                                                                                                                                                                                                                                                                                                                                                                                          |
|-------|-------------------------------------------------------------------------------------------------------------------------------------------------|----------------------------------------------------------------------------------------------------------------------------------------------------------------------------------------------------------------------------------------------------------------------------------------------------------------------------------------------------------------------------------------------------------------------------------------------------------------------------------------------------------------------------------------------------------------------------------------------------------------------------------------------------------------------------------------------------------------------------------------------------------------------------------------------------------------------------------------------------------------------------------------------------------------------------------------------------------------------------------------------------------------------------------------------------------------------------------------------------------------------------------------------------------------------------------------------------------------------------------------------------------------------------------------------------------------------------------------------------------------------------------------------------------------------------------------------------------------------------------------------------------------------------------------------------------------------------------------------------------------------------------------------------------------------------------------------------------------------------------------------------------------------------------------------------------------------------------------------------------------------------------------------------------------------------------------------------------------------------------------------------------------------------------------------------------|
|       |                                                                                                                                                 | <p>GAGTCGTCCTTAATGTATAGATTGAAGAAGAGCTGTTTTACGATCCCTTCAGGATTACAAAATTCAAAGTGCCT<br/> TGCTAGTACCAACCCCTATTTTCATTTCTCGCCAAAAGCACCTCTGATTGACAAATACGATTTATCTAATTTACACG<br/> AAATTGCTTCTGGGGGCGCACCTCTTTCGAAAGAAGTCGGGAAGCGGTTGCAAAACGGTGAGTTAAGCGCATTG<br/> CTAGTATTTCAAGGCTCTAAAACGGCGCTAGCTTCCATCTTCCAGGGATACGACAAGGATATGGCTCACTGAG<br/> ACTACATCAGCTATTCTGATTACACCGAGGGGATGATAAACCGGGCGGGTCGGTAAAGTTGTTCCATTTTTT<br/> GAAGCGAAGGTTGTGGATCTGGATACCGGAAAACGCTGGGCGTTAATCAGAGAGGCGAATTATGTGTGACAGGA<br/> CCTATGATTATGTCCGGTTATGTAACAATCCGGAAGCGACCAACGCCTTGATTGACAAGGATGGATGGCTACAT<br/> TCTGGAGACATAGCTTACTGGGACGAAGACGAACACTTCTTCATAGTTGACCCTTGAAGCTTTAATTAATAAC<br/> AAAGGATATCAGGTAATGAAGATTTTACATGCACACACGCTACAATACCTGTAGGTGGCCCCCGCTGAATTGGA<br/> ATCGATATTGTTACAAACACCCCAACATCTTCGACGCGGGCGTGGCAGGCTTCCCACGATGACGCGGGTGAAC<br/> TCCCGCCCGCTTGTGTTTTGGAGCAGGAAAGACGATGACGGAAGAGATCGTGGATTACGTCGCCAGTAA<br/> ATGAATTCGTTTTACGTTACTCGTACTACATTTCTTTTCAAGTTCAAGTAAACCGGAAAAAGTTGCGCGGA<br/> GGAGTTGTGTTTTGTGGACGAAGTACCGAAAGGCTTACCGGAAAACCTCGACGCAAGAAAAATCAGAGAGATCCTC<br/> ATAAAGGCCAAGAAGGGCGGAAAGTCCAAATG<b>TAA</b>TAACTAGAGCCAGGCATCAATAAAACGAAAGGCTCA<br/> GTCGAAAGACTGGGCCTTTCGTTTTATCTGTTGTTGTGCGGTGAACGCTCTCTACTAGAGTCACACTGGCTCACC<br/> TTCGGTGGGCCTTTCTGCGTTTATA</p>                                                                                                                                                                                                                                                                                                                                                                                                                                                                                                                                                                                                                                                                                                                                                                            |
| T9002 | <p>pTET-<br/> Bba_<br/> B0034-<br/> luxR-<br/> Bba_<br/> B0015-<br/> pluxR-<br/> Bba_<br/> B0032-<br/> GFPmut<br/> 3b-<br/> Bba_<br/> B0015</p> | <p><u>TCCCTATCAGTGATAGAGATTGACATCCCTATCAGTGATAGAGATACTGAGCACTACTAGAGAAAAGGGAGAAAAT</u><br/> ACTAG<b>ATG</b>AAAAACATAAATGCCGACGACACATACAGAATAATTAATAAAAATTAAGCTTGTAGAAGCAATAATG<br/> ATATTAATCAATGCTTATCTGATATGACTAAAATGGTACATTTGTGAATATATTTACTCGCGATCATTTATCCTC<br/> ATTCTATGGTTAAATCTGATATTTCAATCCTAGATAATTACCCTAAAAAATGGAGGCAATATATGATGACGCTA<br/> ATTTAATAAAATATGATCCTATAGTAGATTATTCTAACTCCAATCATTACCAATTAATTGGAATATATTTGAAA<br/> ACAATGCTGTAATAAAAAATCTCCAAATGTAATTAAGAAGCGAAAACATCAGGCTTATCACTGGGTTTGTAGTT<br/> TCCCTATTCATACGGCTAACAAATGGCTTCGGAATGCTTAGTTTTGCACATTCAGAAAAAGACAACATATAGATA<br/> GTTTATTTTTTACATGCGGTGATGAACATACCATTAATTGTTCCCTTCTAGTTGATAATTTACGAAAAATAATA<br/> TAGCAAATAATAAATCAAACAACGATTTAACCAAAAGAGAAAAAGAAATGTTTAGCGTGGGCATGCCAAGGAAAAA<br/> GCTCTGGGATATTTCAAAAATATTAGGTTGCAGTGAGCGTACTGTCACCTTCCATTTAACCAATGCGCAATGA<br/> AACTCAATACAACAACCGCTGCCAAAGTATTTCTAAAGCAATTTAACAGGAGCAATTTGATTGCCATACTTTA<br/> AAAA<b>TAA</b>TAACTACTGATAGTGTAGTACTACTAGAGCCAGGCATCAATAAAACGAAAGGCTCAGTC<br/> GAAAGACTGGGCCTTTCGTTTTATCTGTTGTTTTGTCGGTGAACGCTCTCTACTAGAGTCACACTGGCTCACCTTC<br/> GGGTGGGCCTTTCGCGTTTATATACTAGACACCTGTAGGATCGTACAGGTTTACGCAAGAAAATGGTTTGTAT<br/> AGTCGAATAAATACTAGAGTCACACAGGAAAGTACTAG<b>ATG</b>ACTATAATGATAAAAAAATCGGATTTTTTGGCAA<br/> TTCCATCGGAGGAGTATAAAGGTATTTCAAGTCTTCGTTATCAAGTGTAAAGCAAGACTTGAGTGGGACTTAG<br/> TTGTAGAAAAAACCCTGAATCAGATGAGTATGATAACTCAAATGCAGAAATATATTTATGCTTGTGATGATACTG<br/> AAAATGTAAGTGGATGCTGGCGTTTATTACCTACAACAGGTGATTATATGCTGAAAAGTGTTTTTCTGAATTGC<br/> TTGGTCAACAGAGTGTCCCAAAGATCCTAATATAGTCAATTAAGTTCGTTTTGCTGTAGGTAATAAATAGCTCAA<br/> AGATAAATAACTCTGCTAGTGAATTACAATGAACTATTTGAAGCTATATATAAACACGCTGTTAGTCAAGGTA<br/> TTACAGAATAAGTAAACAGTAAACATCAACAGCAATAGAGCGATTTTTAAAGCGTATTAAGTTCCTGTCTATCGTA<br/> TTGGAGACAAAAGAAATTCATGTATTAGGTGATACTAAATCGGTTGTATTGTCTATGCCTATTAATGAACAGTTTA<br/> AAAAAGCAGTCTTAAT<b>TAA</b>TAACTACTAGAGCCAGGCATCAATAAAACGAAAGGCTCAGTCGAAAGACTGGGCC<br/> TTTCGTTTTATCTGTTGTTTTGTCGGTGAACGCTCTCTACTAGAGTCACACTGGCTCACCTTCGGTGGGCCTTTC<br/> TGCGTTTATA</p> |

\*Promoters are underlined, start and stop codons are in bold, the RBS is in italics, and linker sequences of encoded fusion proteins are in lowercase. The *lrs* intergenic region is in red.

## REFERENCES

- (1) Fernandes, R.; Bentley, W. E. Al-2 biosynthesis module in a magnetic nanofactory alters bacterial response via localized synthesis and delivery. *Biotechnol. Bioeng.* **2009**, *102*, 390–399.
- (2) Allen, T. M.; Cleland, L. G. Serum-induced leakage of liposome contents. *Biochim. Biophys. Acta.* **1980**, *597*, 418–426.
- (3) Yu, W.; Sato, K.; Wakabayashi, M.; Nakaishi, T.; Ko-Mitamura, E. P.; Shima, Y.; Urabe, I.; Yomo, T. Synthesis of functional protein in liposome. *J. Biosci. Bioeng.* **2001**, *92*, 590–593.
- (4) Spencer, A. C.; Torre, P.; Mansy, S. S. The Encapsulation of Cell-free Transcription and Translation Machinery in Vesicles for the Construction of Cellular Mimics. *J. Vis. Exp.* **2013**, e51304.
- (5) Vilchez, R.; Lemme, A.; Thiel, V.; Schulz, S.; Sztajer, H.; Wagner-Döbler, I. Analysing traces of autoinducer-2 requires standardization of the *Vibrio harveyi* bioassay. *Anal. Bioanal. Chem.* **2007**, *387*, 489–496.
- (6) Jett, B. D.; Hatter, K. L.; Huycke, M. M.; Gilmore, M. S. Simplified agar plate method for quantifying viable bacteria. *Biotechniques* **1997**, *23*, 648–650.
- (7) S., A. FastQC: a quality control tool for high throughput sequence data. Available online at: <http://www.bioinformatics.babraham.ac.uk/projects/fastqc>. **2010**.
- (8) Langmead, B.; Salzberg, S. L. Fast gapped-read alignment with Bowtie 2. *Nat. Methods* **2012**, *9*, 357–359.
- (9) Trapnell, C.; Hendrickson, D. G.; Sauvageau, M.; Goff, L.; Rinn, J. L.; Pachter, L. Differential analysis of gene regulation at transcript resolution with RNA-seq. *Nat. Biotechnol.* **2013**,

31, 46–53.

- (10) Roberts, A.; Pimentel, H.; Trapnell, C.; Pachter, L. Identification of novel transcripts in annotated genomes using RNA-Seq. *Bioinformatics* **2011**, *27*, 2325–2329.
- (11) Trapnell, C.; Roberts, A.; Goff, L.; Pertea, G.; Kim, D.; Kelley, D. R.; Pimentel, H.; Salzberg, S. L.; Rinn, J. L.; Pachter, L. Differential gene and transcript expression analysis of RNA-seq experiments with TopHat and Cufflinks. *Nat. Protoc.* **2012**, *7*, 562–578.
- (12) Antunes, L. C. M.; Schaefer, A. L.; Ferreira, R. B. R.; Qin, N.; Stevens, A. M.; Ruby, E. G.; Greenberg, E. P. Transcriptome Analysis of the *Vibrio fischeri* LuxR-LuxI Regulon. *J. Bacteriol.* **2007**, *189*, 8387–8391.
- (13) Sonesson, C.; Delorenzi, M.; Mortazavi, A.; Williams, B.; McCue, K.; Schaeffer, L.; Wold, B.; Chen, G.; Wang, C.; Shi, T.; et al. A comparison of methods for differential expression analysis of RNA-seq data. *BMC Bioinformatics* **2013**, *14*, 91.
- (14) Cosson, P.; Zulianello, L.; Join-lambert, O.; Faurisson, F.; Gebbie, L.; Benghezal, M.; Delden, C. Van; Curty, L. K.; Cosson, P.; Zulianello, L.; et al. *Pseudomonas aeruginosa* Virulence Analyzed in a *Dictyostelium discoideum* Host System. *J. Bacteriol.* **2002**, *184*, 3027–3033.
